# Supplementary material for: Synthesis and antioxidant activities of N-thiophenyl ebselenamines: a 77Se{1H} NMR mechanistic study
Source: Royal Society of Chemistry journal article supplement (doi:10.1039/d2nj01225a), 2022-01-01

## Supporting Information

for

### Synthesis and Antioxidant Activities of *N*-Thiophenyl Ebselenamines: The $^{77}\text{Se}\{^1\text{H}\}$ NMR Mechanistic Study†

Manish Kumar and Vijay P. Singh\*

Department of Chemistry & Centre of Advanced Studies in Chemistry, Panjab  
University, Sector-14, Chandigarh – 160 014, India

\*E-mail: [vijay@pu.ac.in](mailto:vijay@pu.ac.in)

#### ---Table of Contents---

|           |                                                                                                                                                                                |
|-----------|--------------------------------------------------------------------------------------------------------------------------------------------------------------------------------|
| p S2-S13  | $^1\text{H}$ , $^{13}\text{C}$ , $^{77}\text{Se}\{^1\text{H}\}$ NMR and HRMS spectra for compounds <b>8</b> , <b>9</b> , <b>15</b> and <b>7a</b>                               |
| p S14-S24 | The $^{77}\text{Se}\{^1\text{H}\}$ NMR data for mechanistic study of <b>8</b> with PhSH and $\text{H}_2\text{O}_2$                                                             |
| p S25-31  | The $^{77}\text{Se}\{^1\text{H}\}$ NMR data for mechanistic study of <b>9</b> with PhSH and $\text{H}_2\text{O}_2$                                                             |
| p S32-35  | The $^{77}\text{Se}\{^1\text{H}\}$ NMR mechanistic study spectra of <b>9</b> with PhSSPh                                                                                       |
| p S36     | The $^{77}\text{Se}\{^1\text{H}\}$ NMR spectrum of diselenide <b>15</b> with $\text{H}_2\text{O}_2$ and PhSH                                                                   |
| p S37-57  | $^1\text{H}$ , $^{13}\text{C}$ , $^{77}\text{Se}\{^1\text{H}\}$ NMR and HRMS spectra for <b>10</b> , <b>12</b> , <b>16</b> and <b>17</b>                                       |
| p S58-61  | <b>Table S1-S4.</b> Optimized geometries, Sum of electronic and thermal Enthalpies and Cartesian coordinates                                                                   |
| p S62-63  | <b>Table S5-S6.</b> Data obtained by DFT calculations, bond dissociation enthalpies, and $^{77}\text{Se}\{^1\text{H}\}$ NMR isotropic and anisotropic values                   |
| p S64     | <b>Figure S56.</b> Spin density maps of the radical cations of <b>12</b> and <b>17</b> formed upon 1-electron oxidation calculated at the UB3LYP/6-311+G(d) level in gas phase |
| pS65      | <b>Scheme S1.</b> Proposed mechanism for <b>12</b> from diselenide <b>9</b>                                                                                                    |

Figure S1. The  $^1\text{H}$  NMR spectrum of compound **8** in  $\text{CDCl}_3$

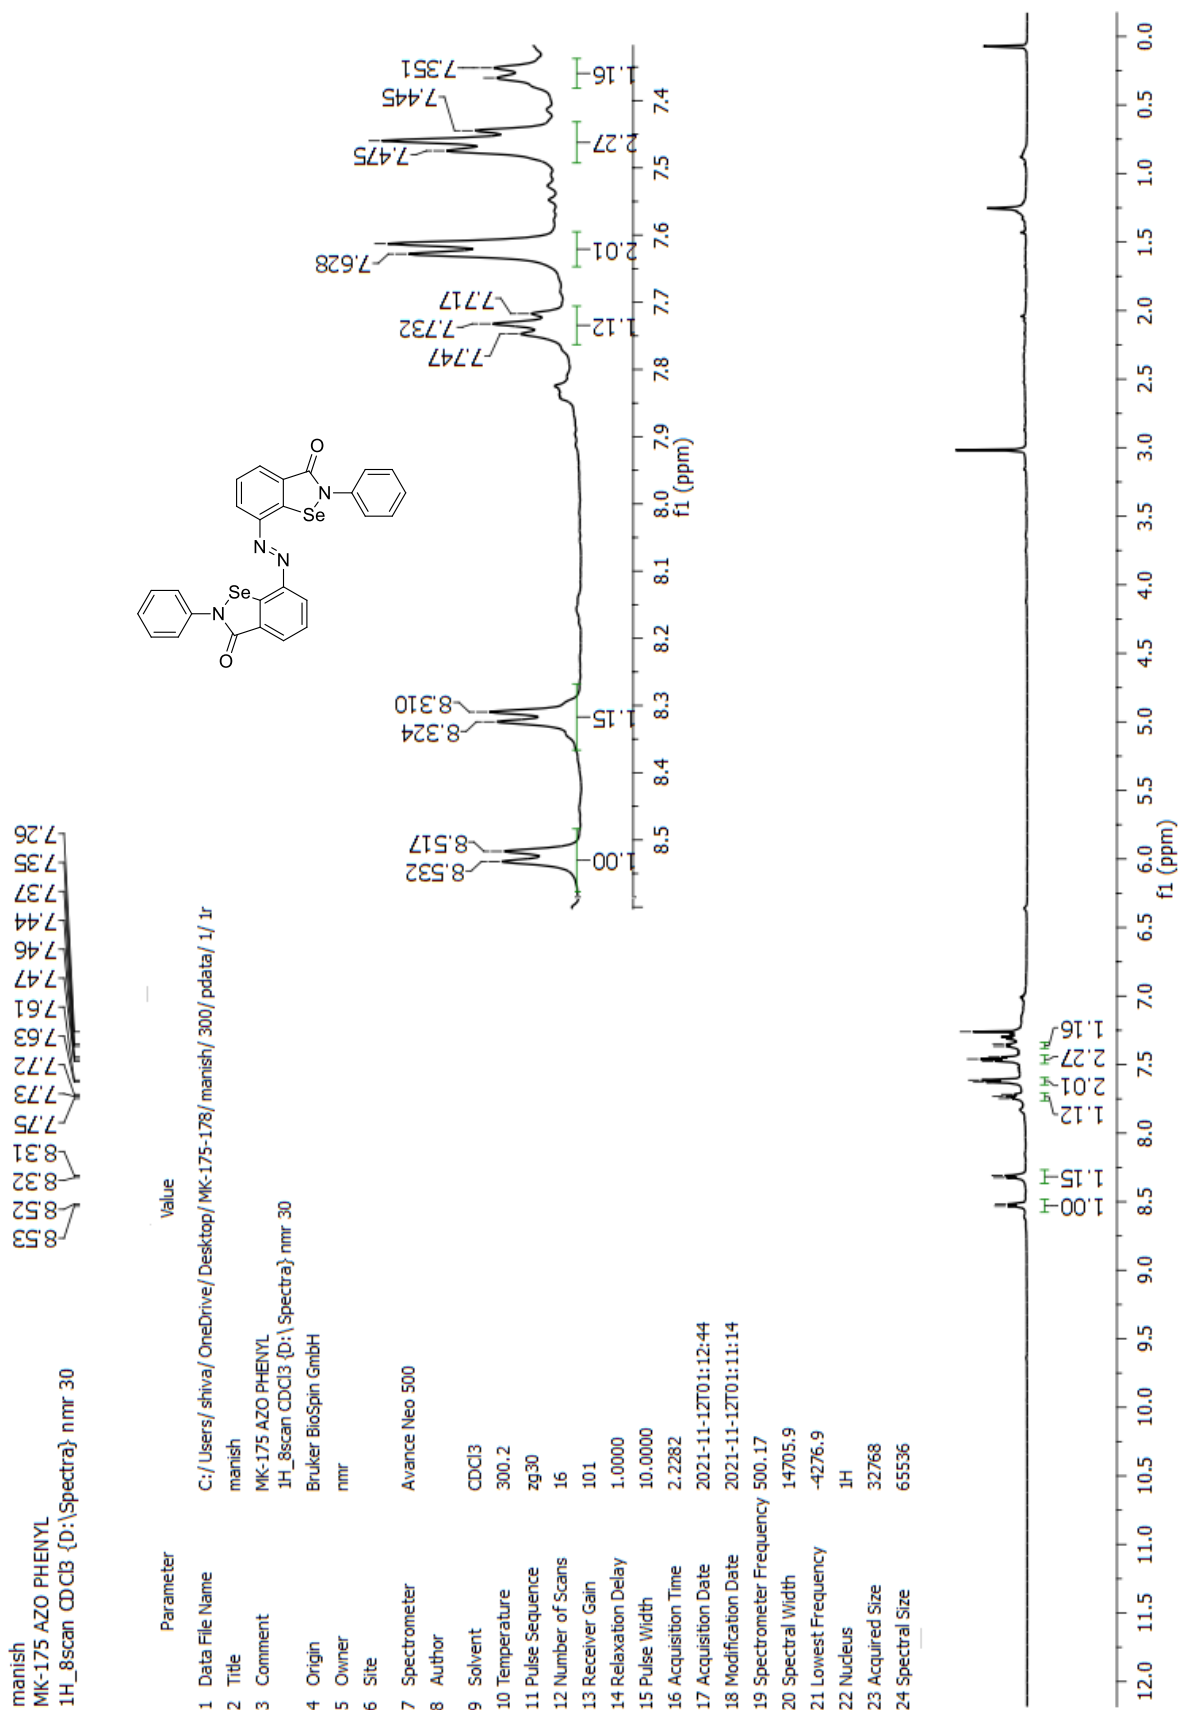

Figure S2. The  $^{13}\text{C}$  NMR spectrum of compound **8** in  $\text{CDCl}_3$

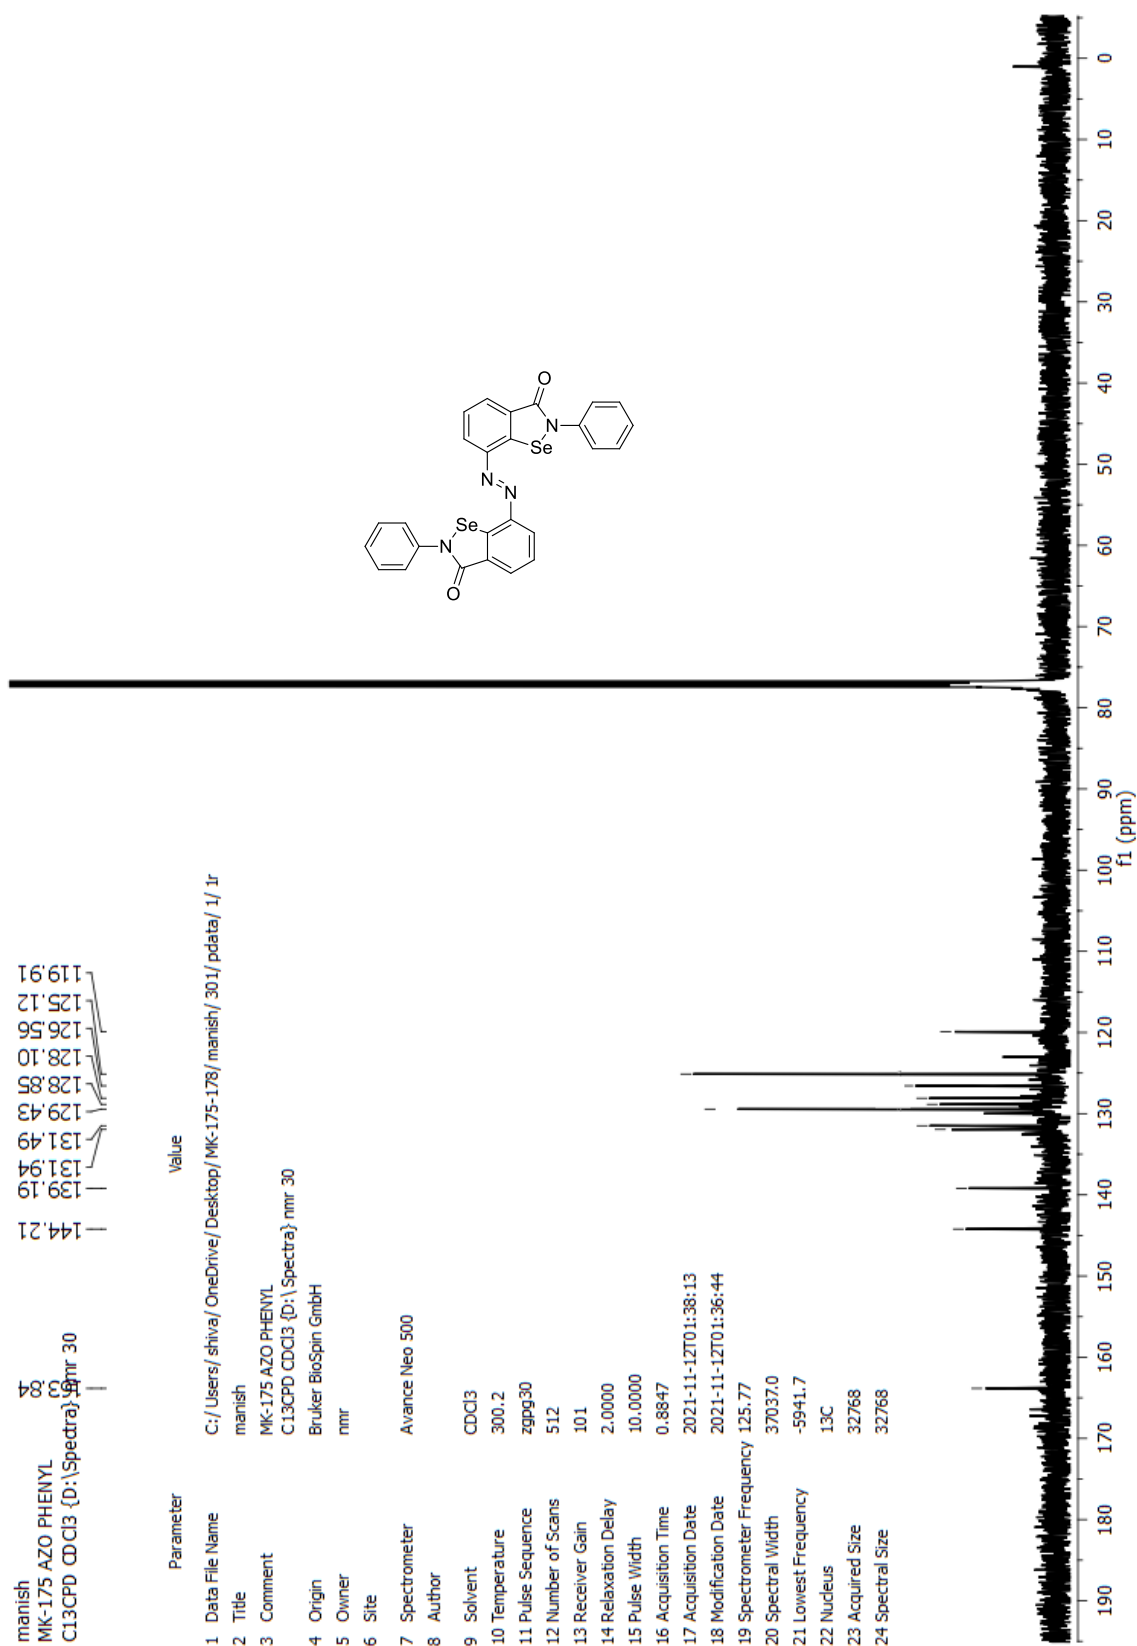

Figure S3. The  $^{77}\text{Se}\{^1\text{H}\}$  NMR spectrum of compound **8** in  $\text{CDCl}_3$

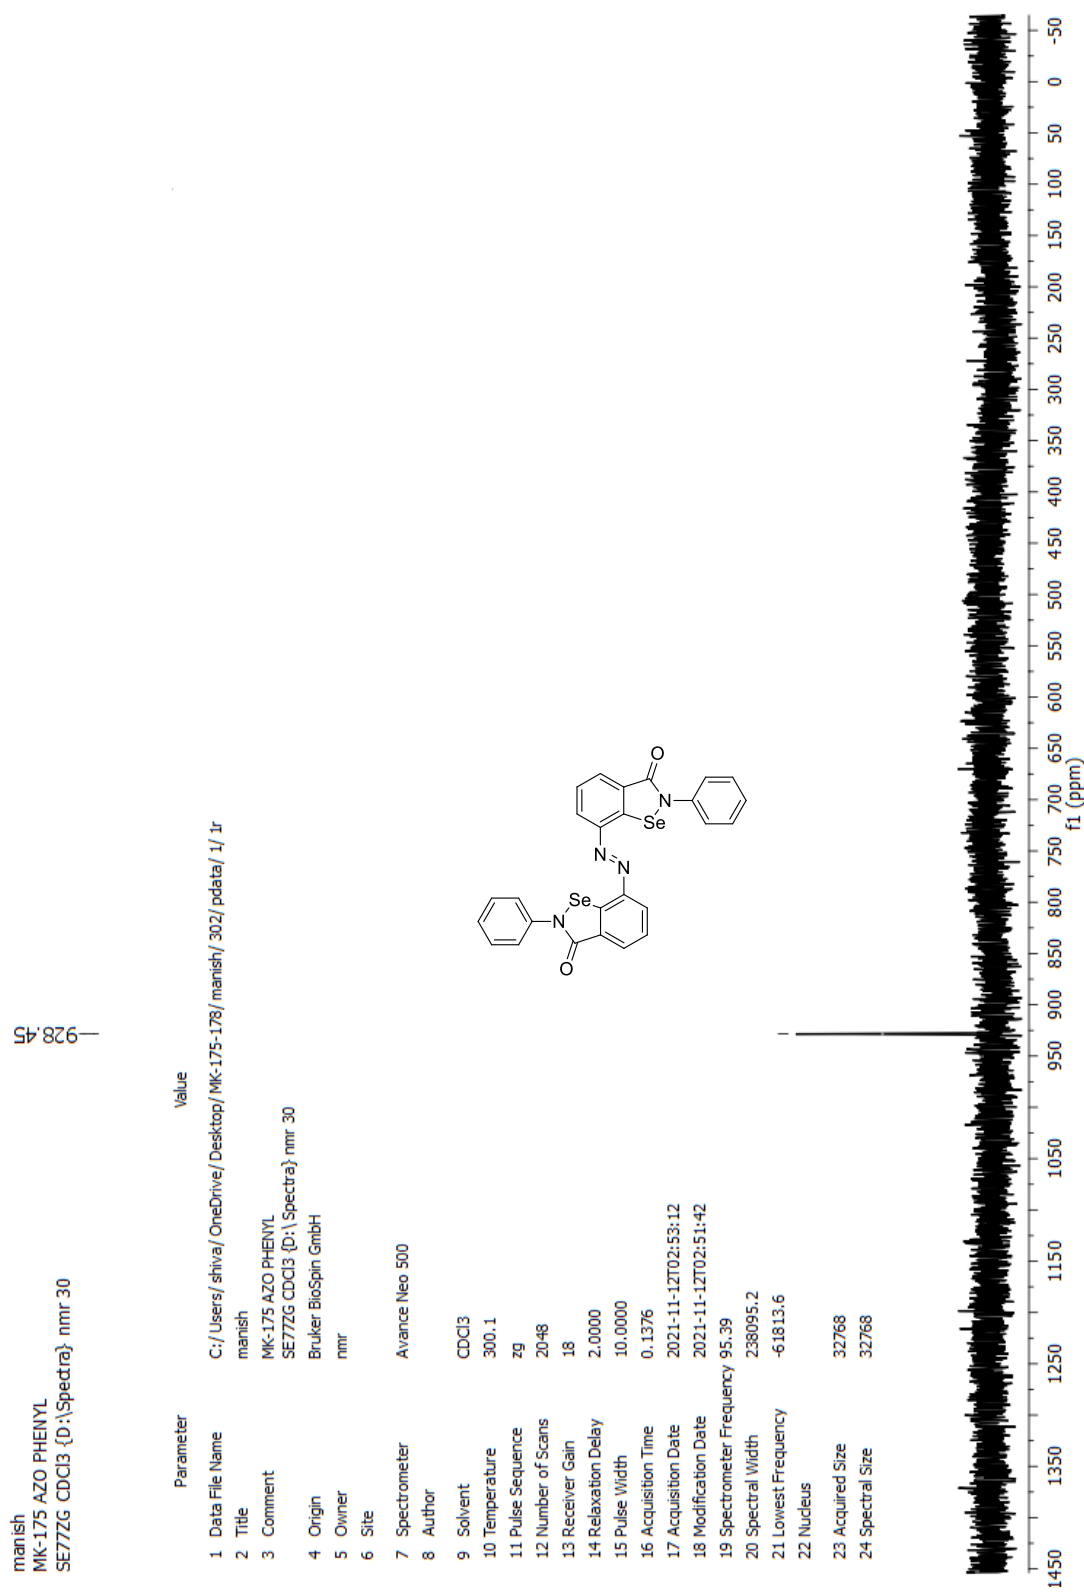

Figure S4. The  $^1\text{H}$  NMR spectrum of diselenide **9** in  $\text{CDCl}_3$

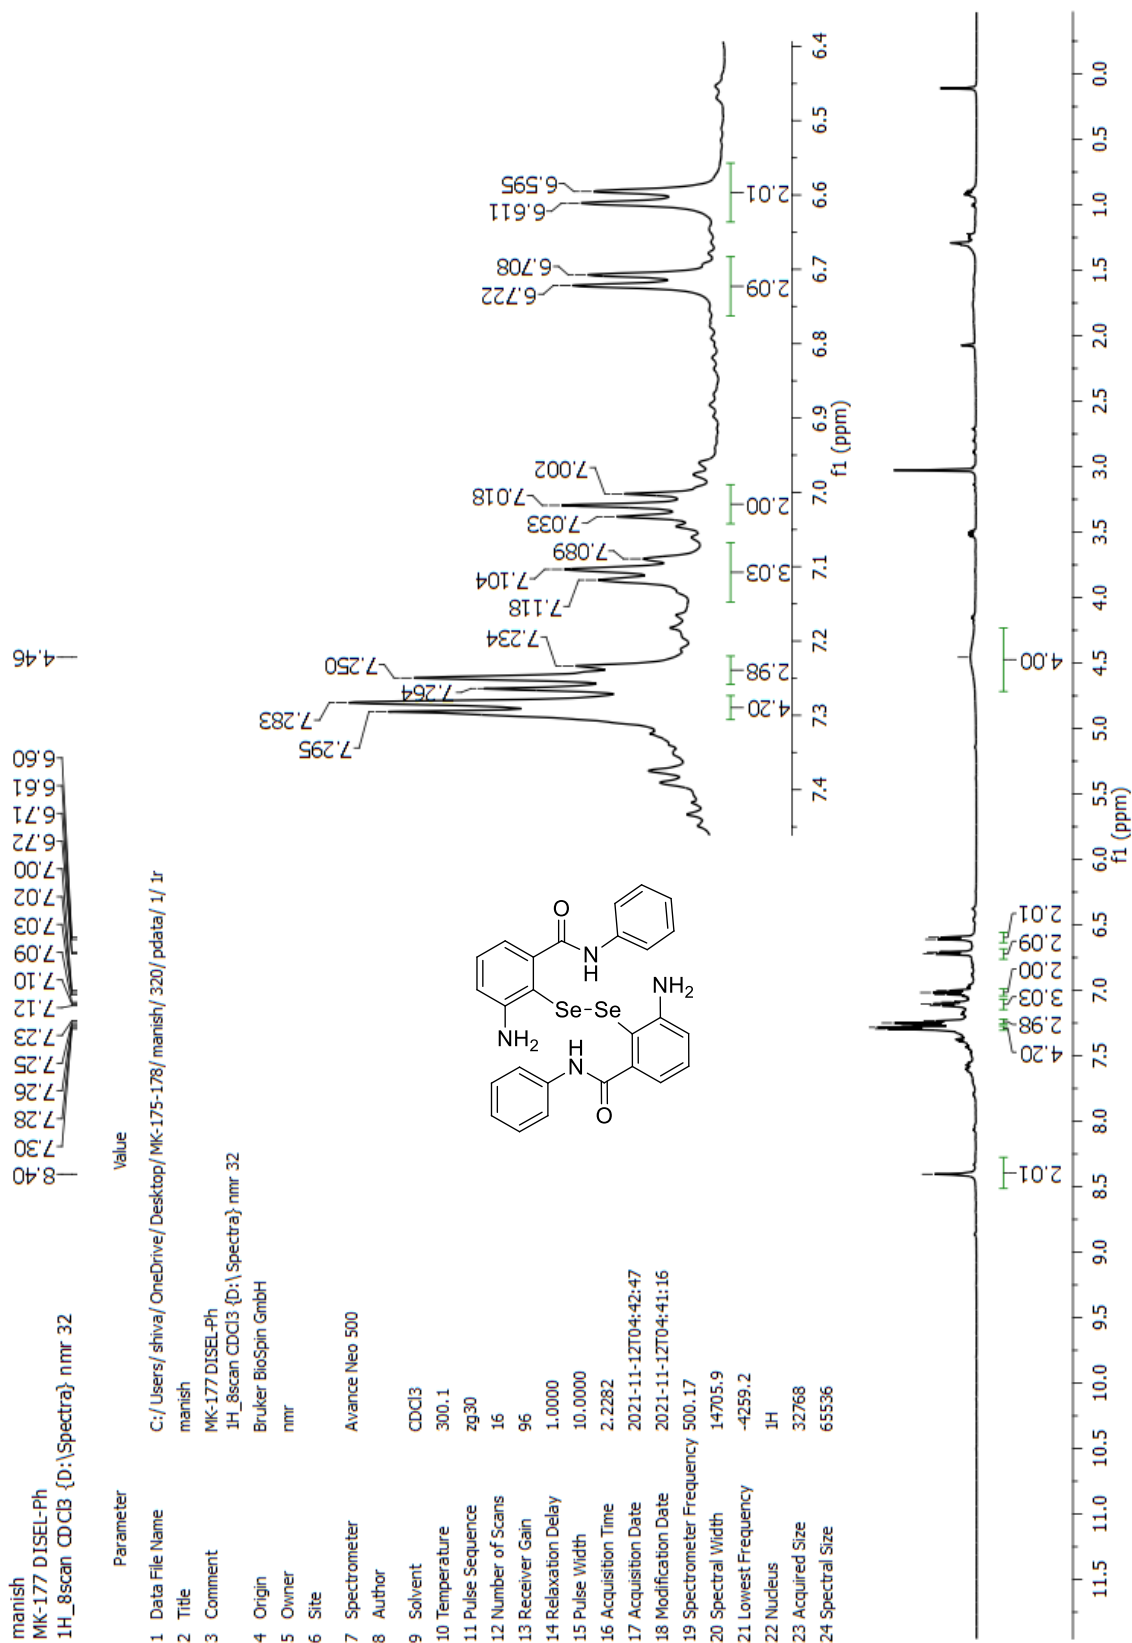

Figure S5. The  $^{13}\text{C}$  NMR spectrum of diselenide **9** in  $\text{CDCl}_3$

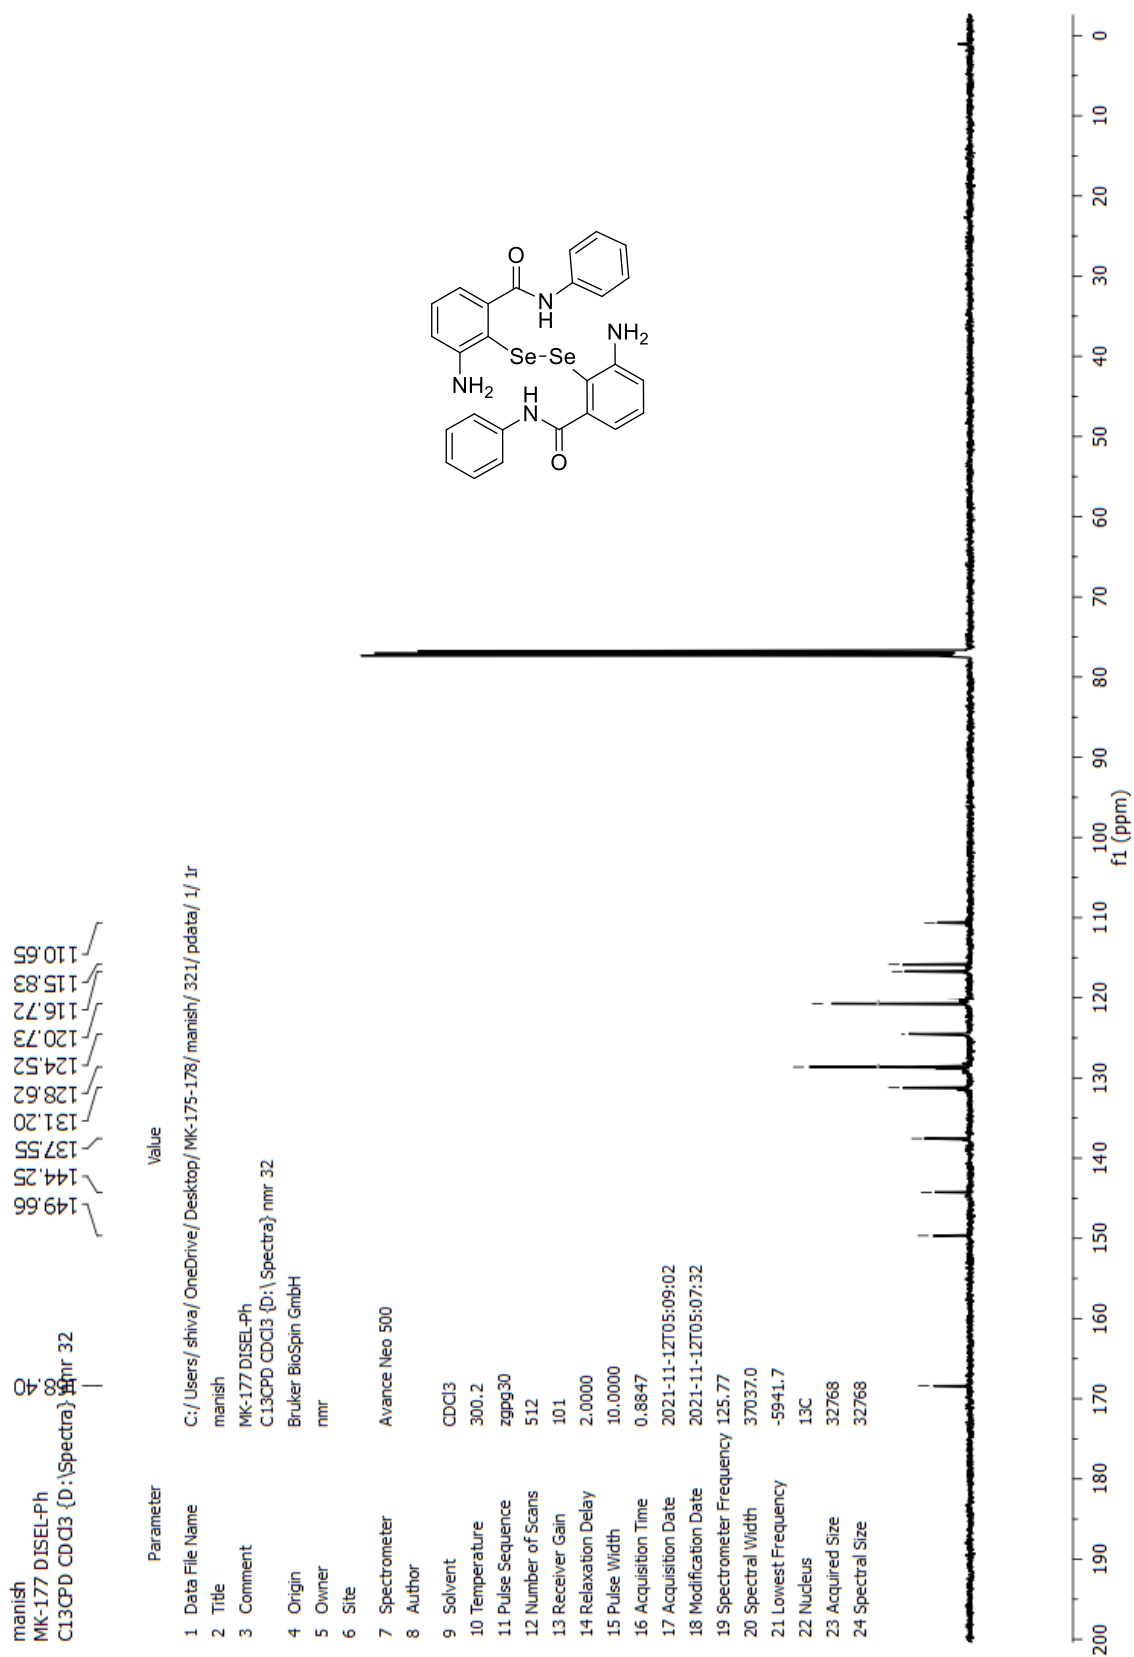

Figure S6. The  $^{77}\text{Se}\{^1\text{H}\}$  NMR spectrum of diselenide **9** in  $\text{CDCl}_3$

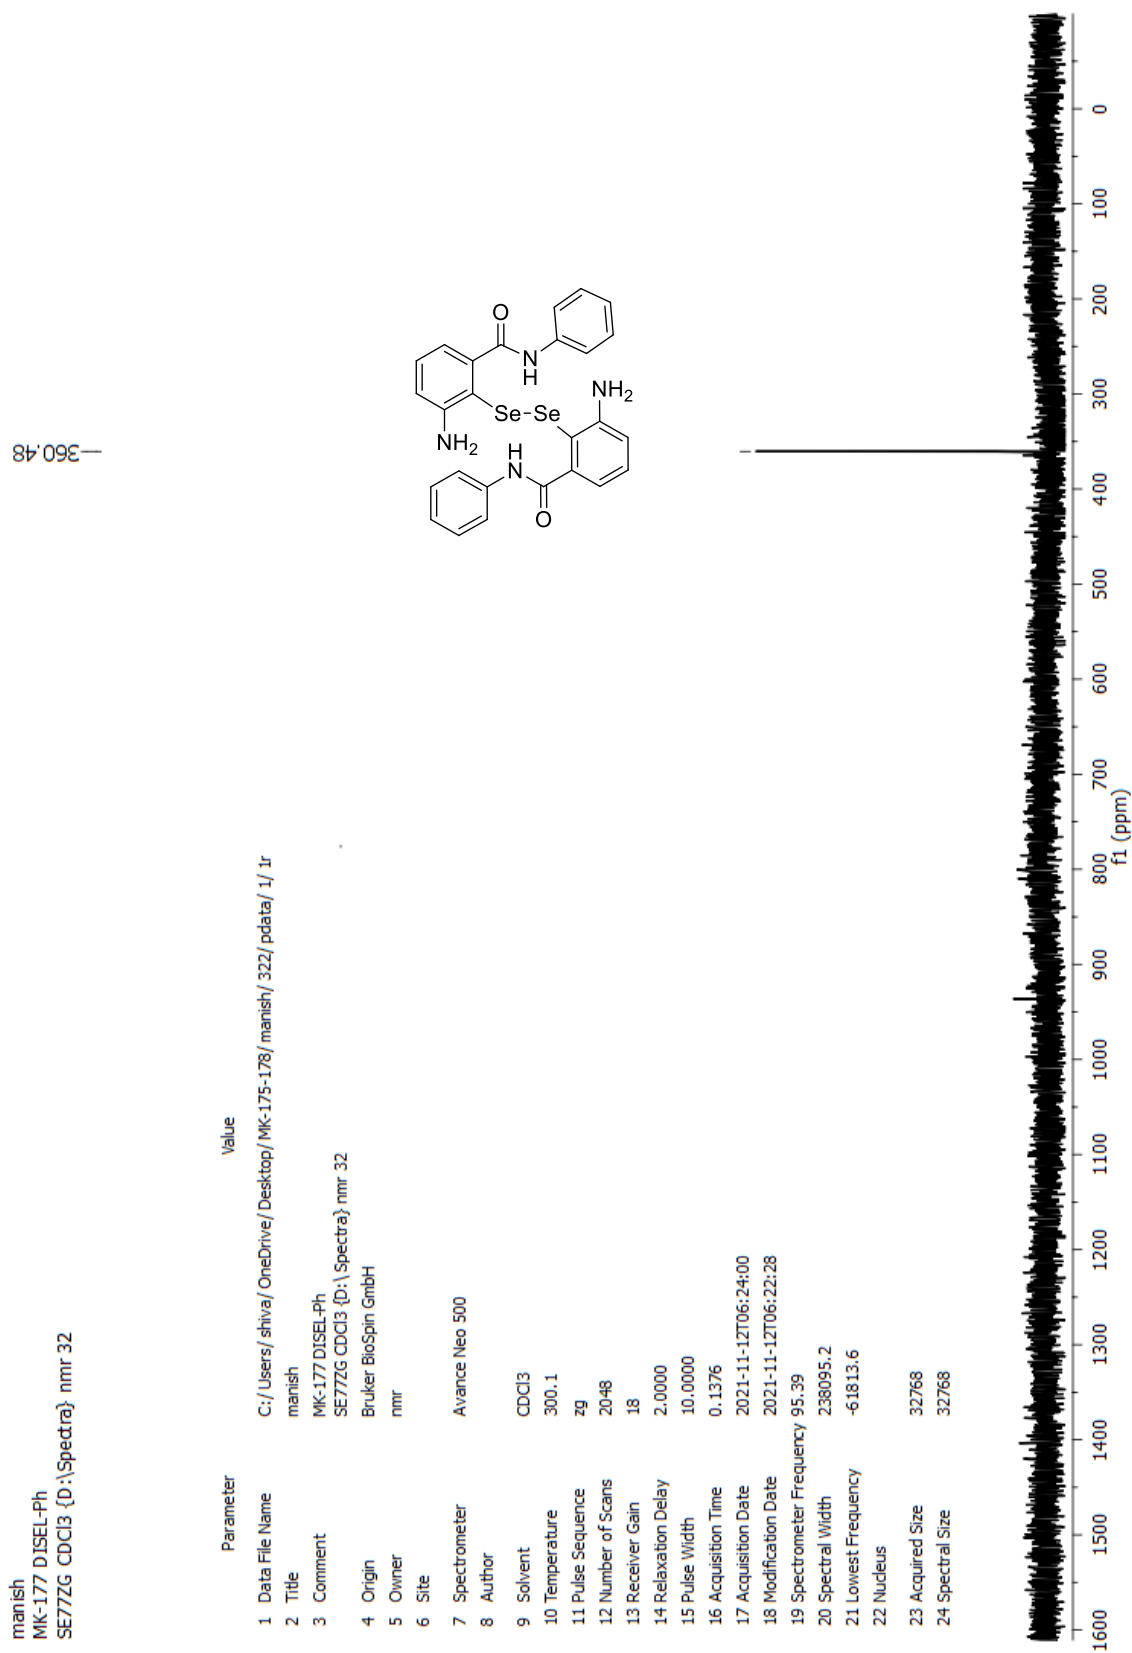

Figure S7. The  $^1\text{H}$  NMR spectrum of diselenide **15** in  $\text{CDCl}_3$

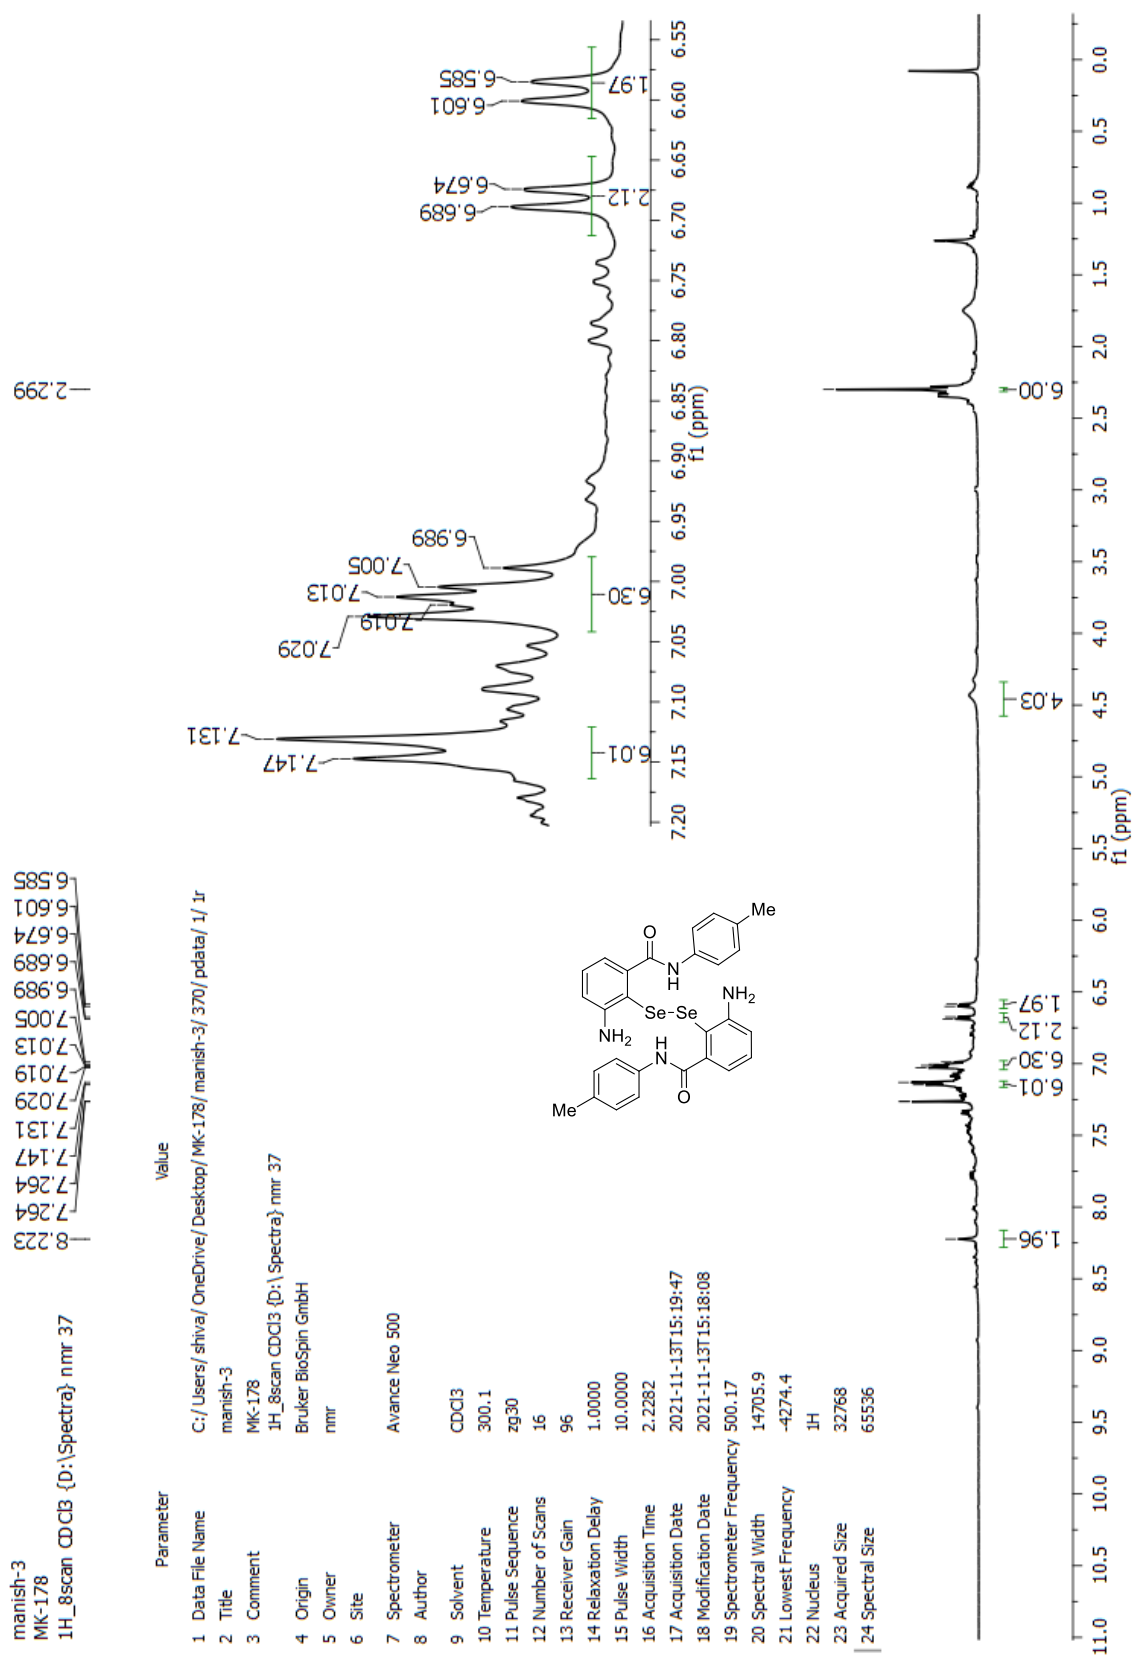



Figure S8. The  $^{13}\text{C}$  NMR spectrum of diselenide **15** in  $\text{CDCl}_3$

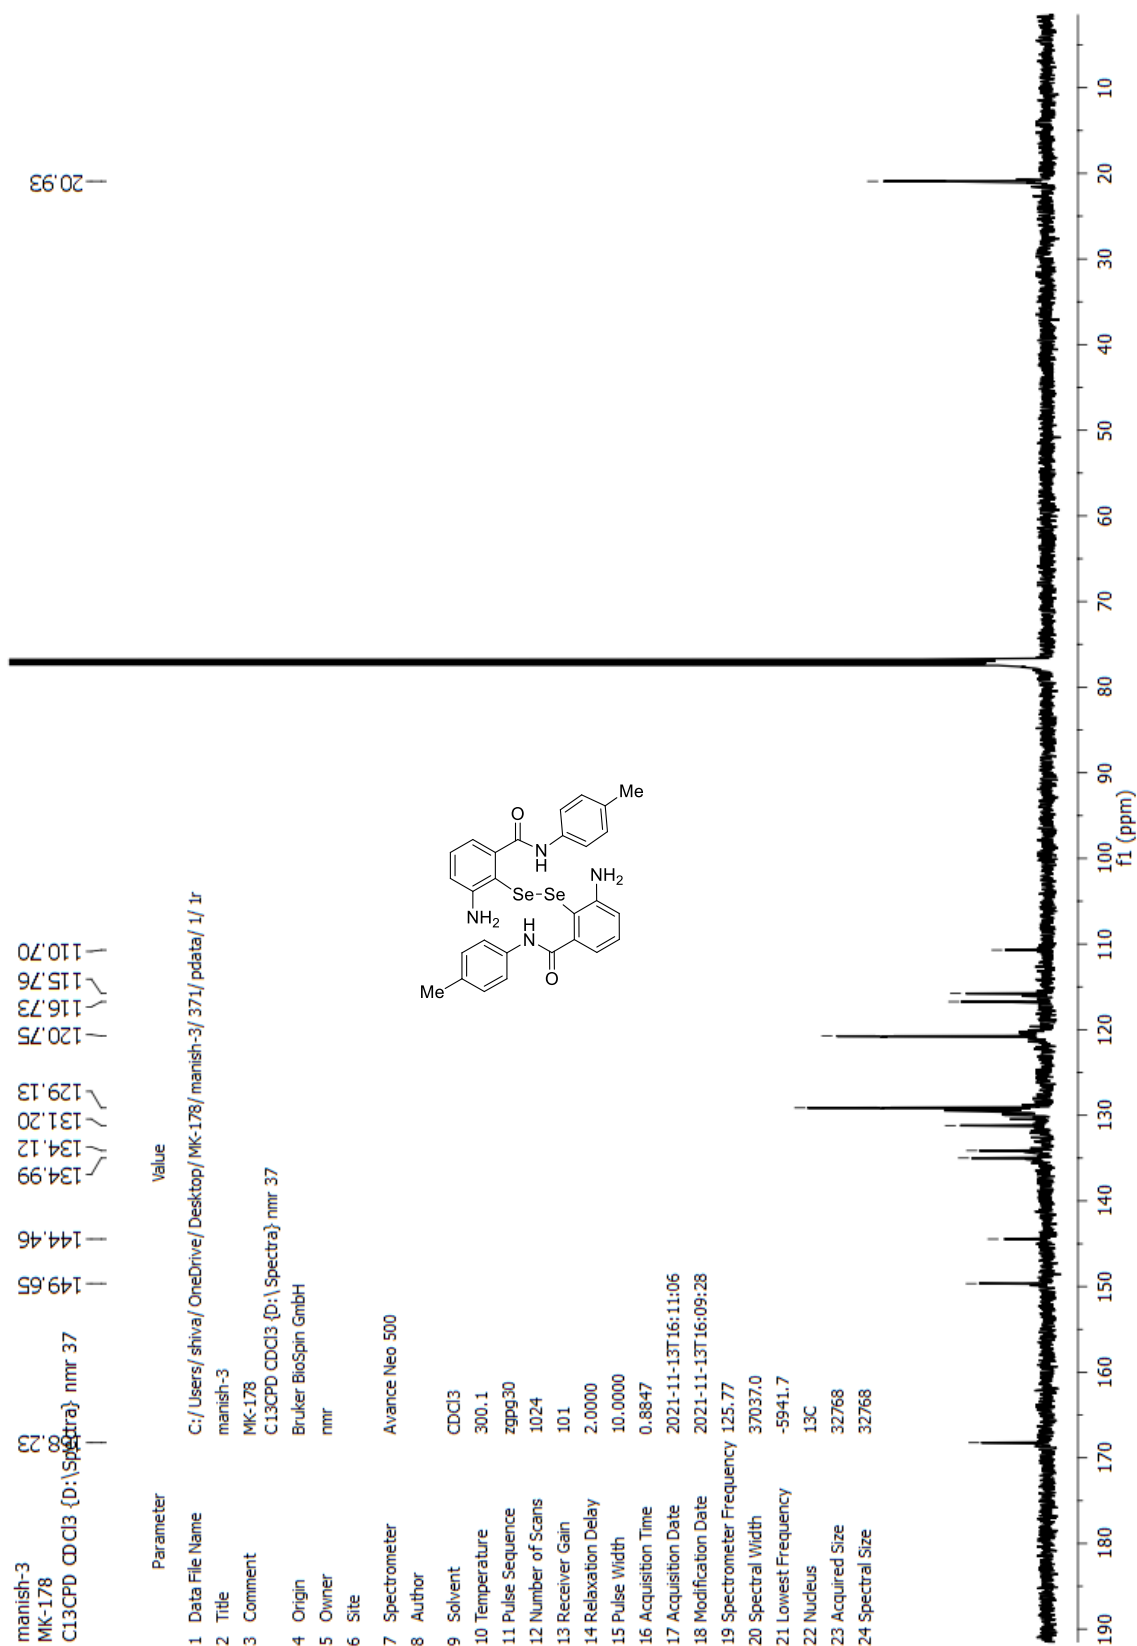

Figure S9. The  $^{77}\text{Se}\{^1\text{H}\}$  NMR spectrum of diselenide **15** in  $\text{CDCl}_3$

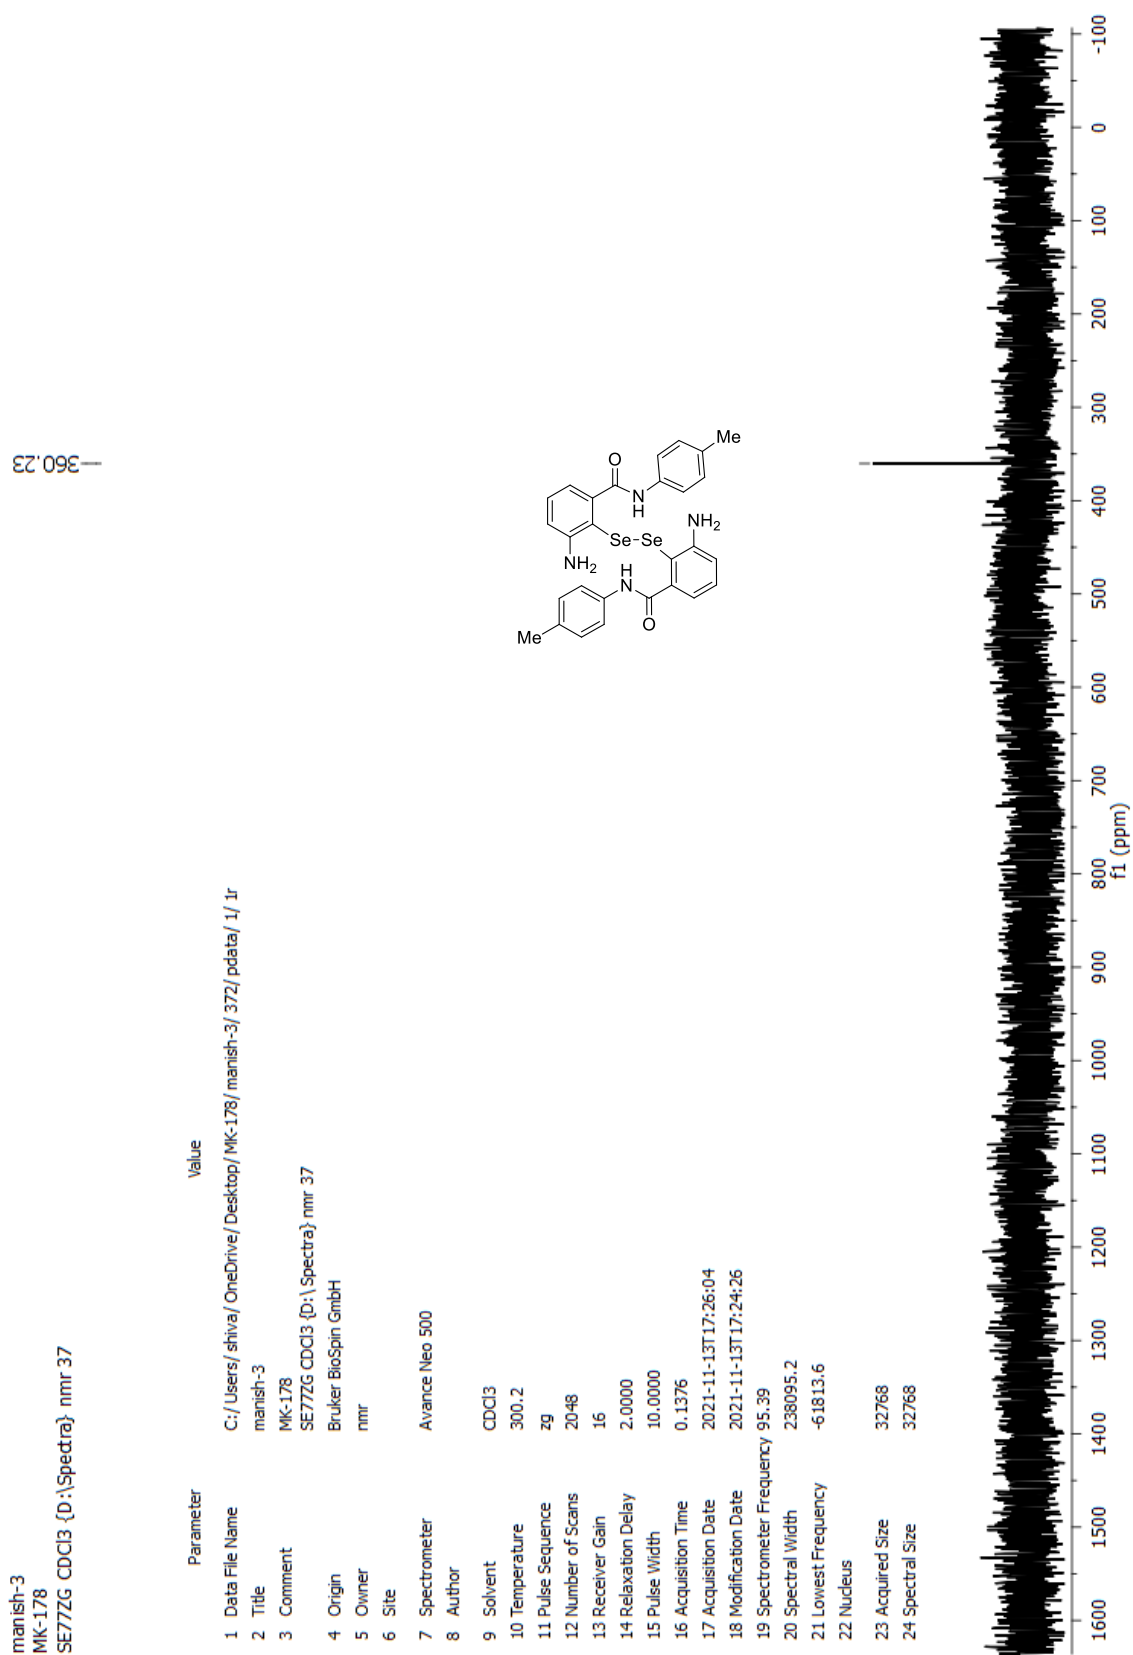



Figure S11. The  $^{13}\text{C}$  NMR spectrum of compound **7a** in  $\text{DMSO-d}_6$

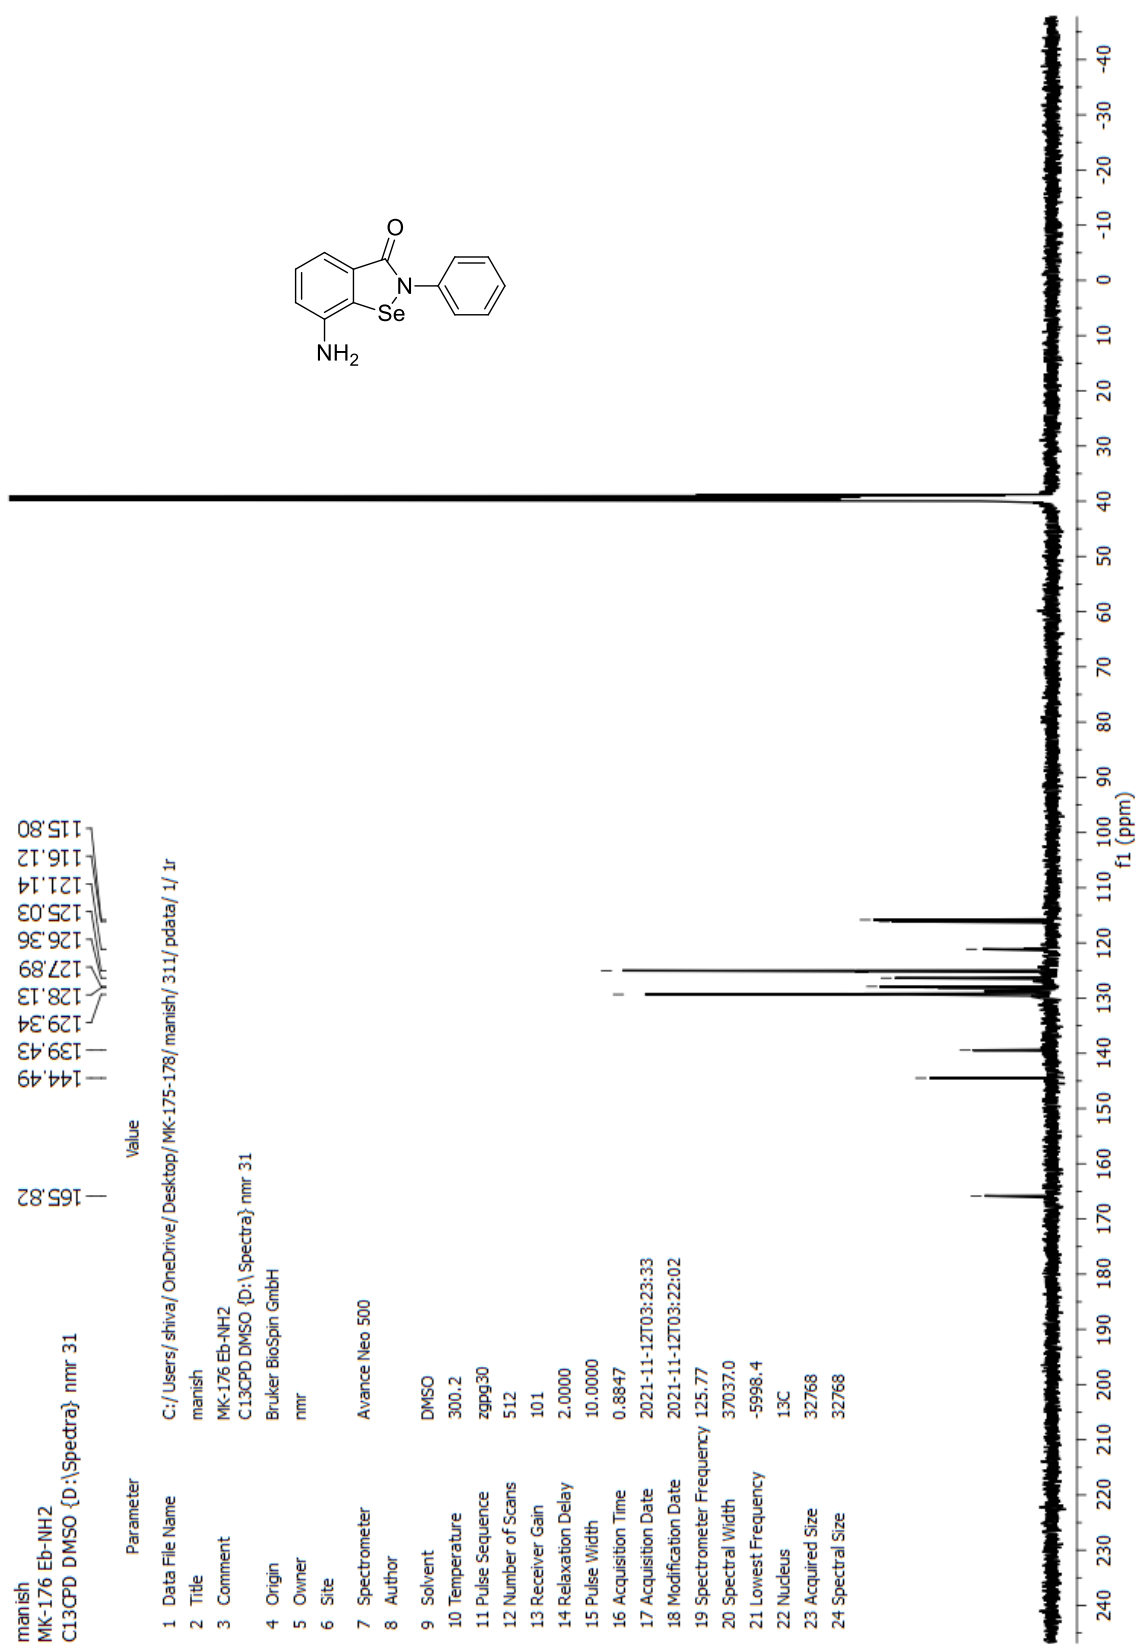

Figure S12. The  $^{77}\text{Se}\{^1\text{H}\}$  NMR spectrum of compound **7a** in DMSO- $d_6$

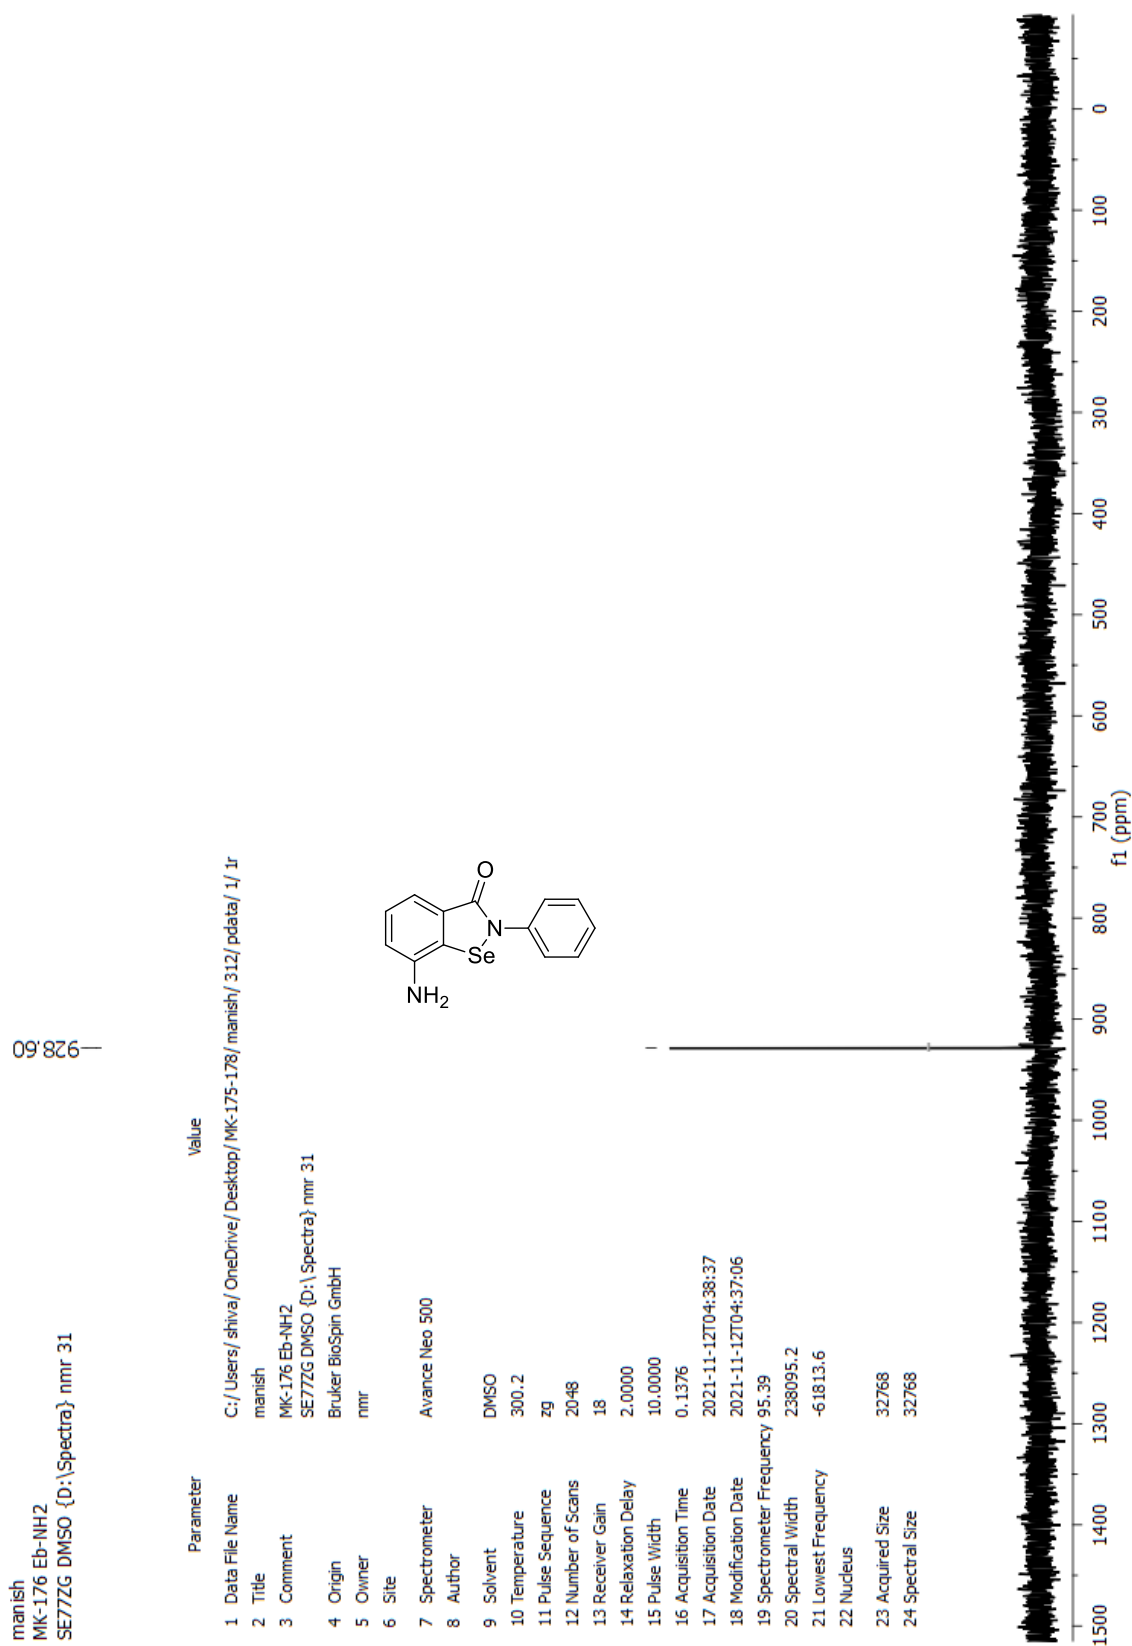

## Mechanistic study of **8** with PhSH and H<sub>2</sub>O<sub>2</sub>

Figure S13. The <sup>77</sup>Se{<sup>1</sup>H} NMR spectrum of compound **8** in CDCl<sub>3</sub>

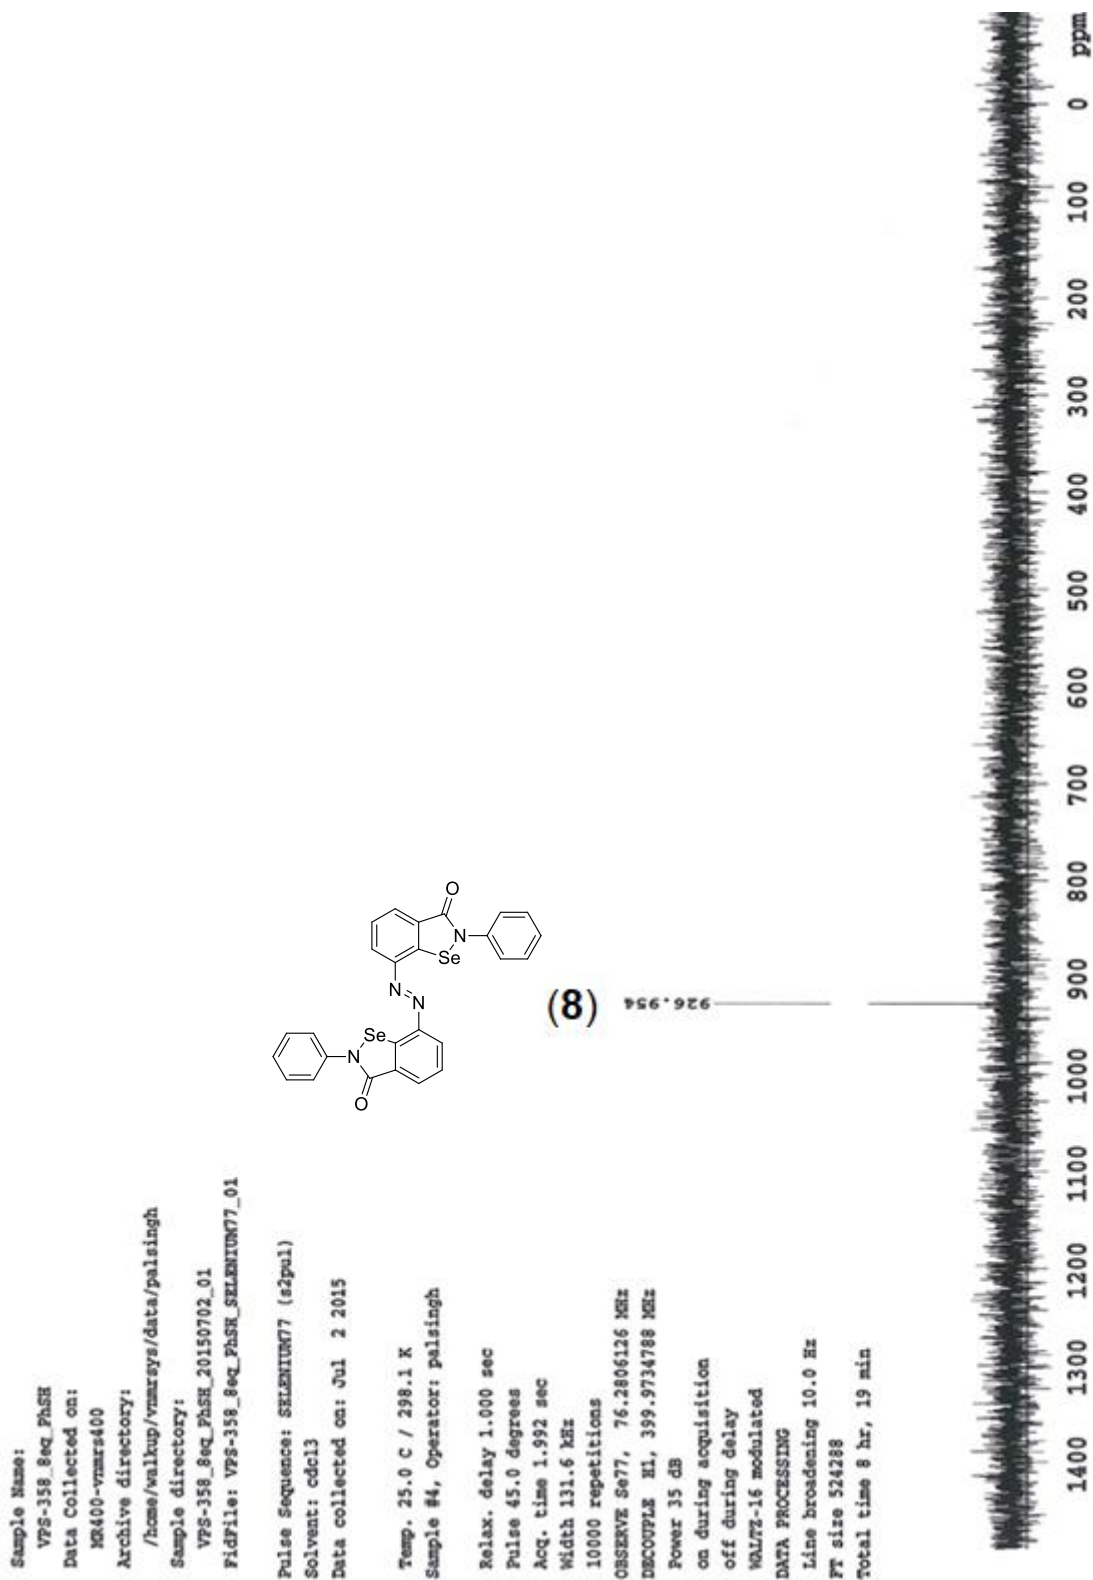

Figure S14. The  $^{77}\text{Se}\{^1\text{H}\}$  NMR spectrum of **8** with PhSH (8 equiv)

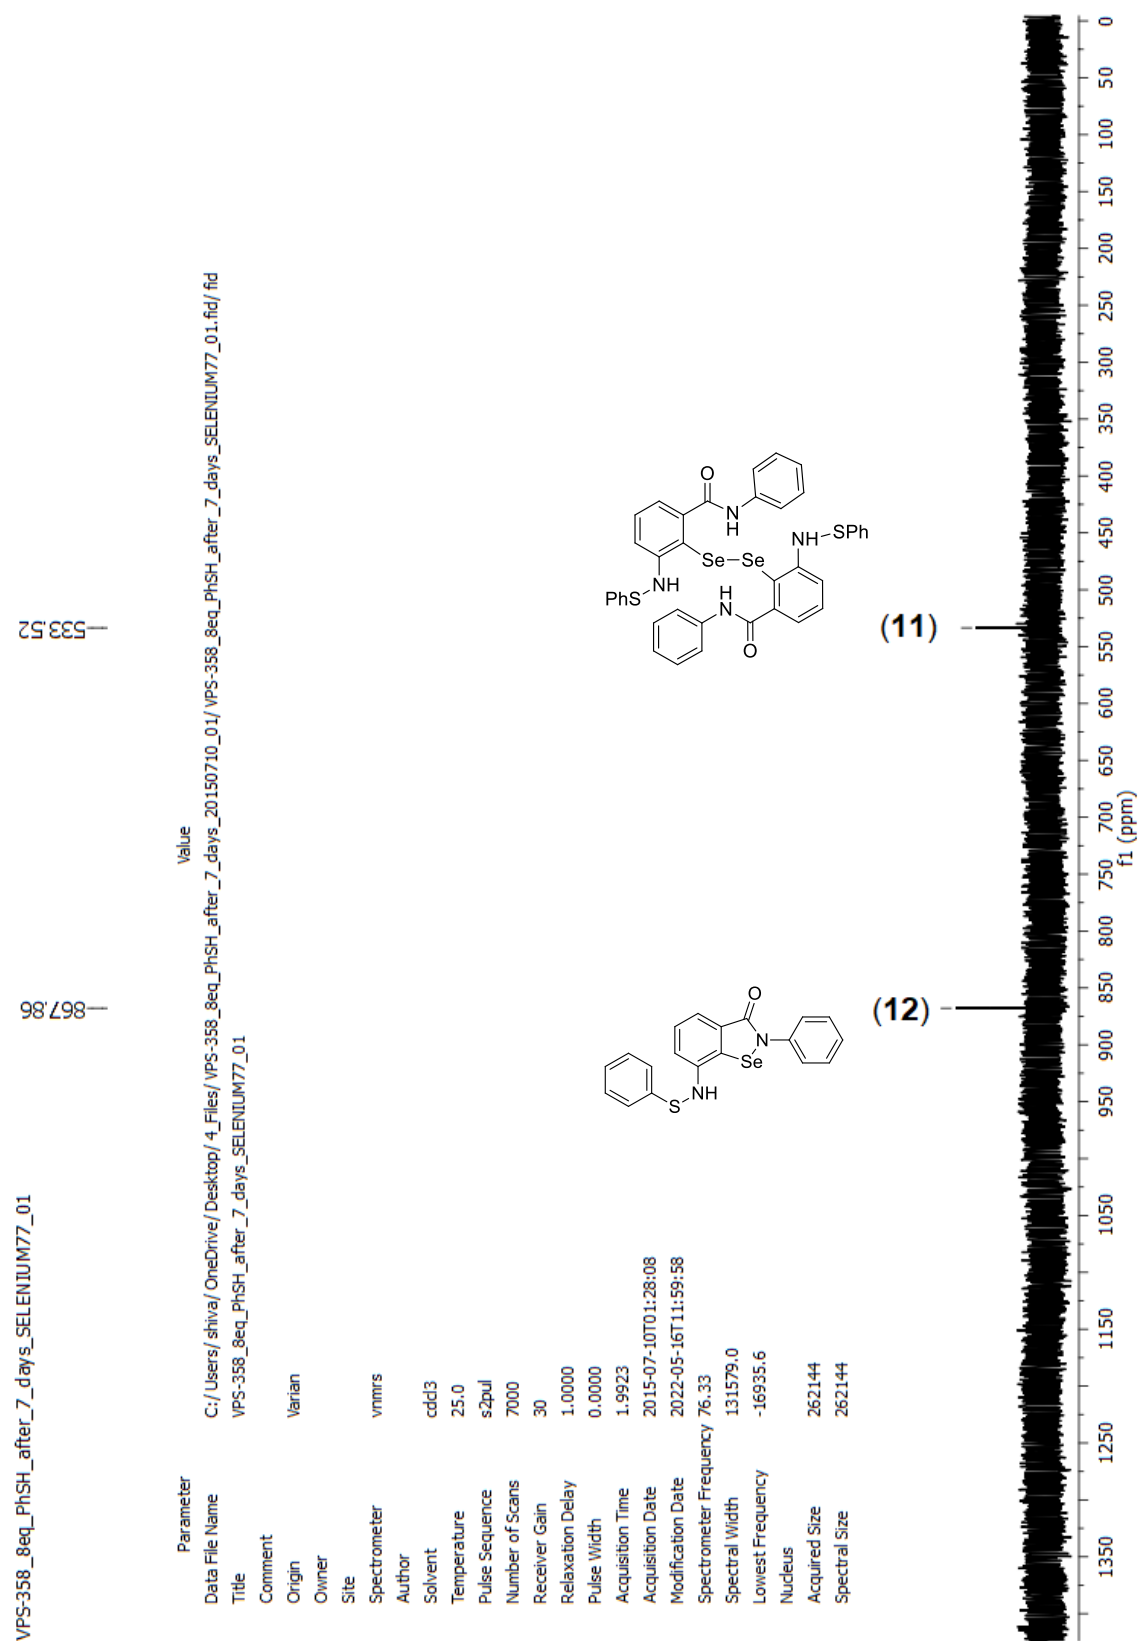

Figure S15. The  $^{77}\text{Se}\{^1\text{H}\}$  NMR spectrum of **8** with PhSH (8 + 8 equiv)

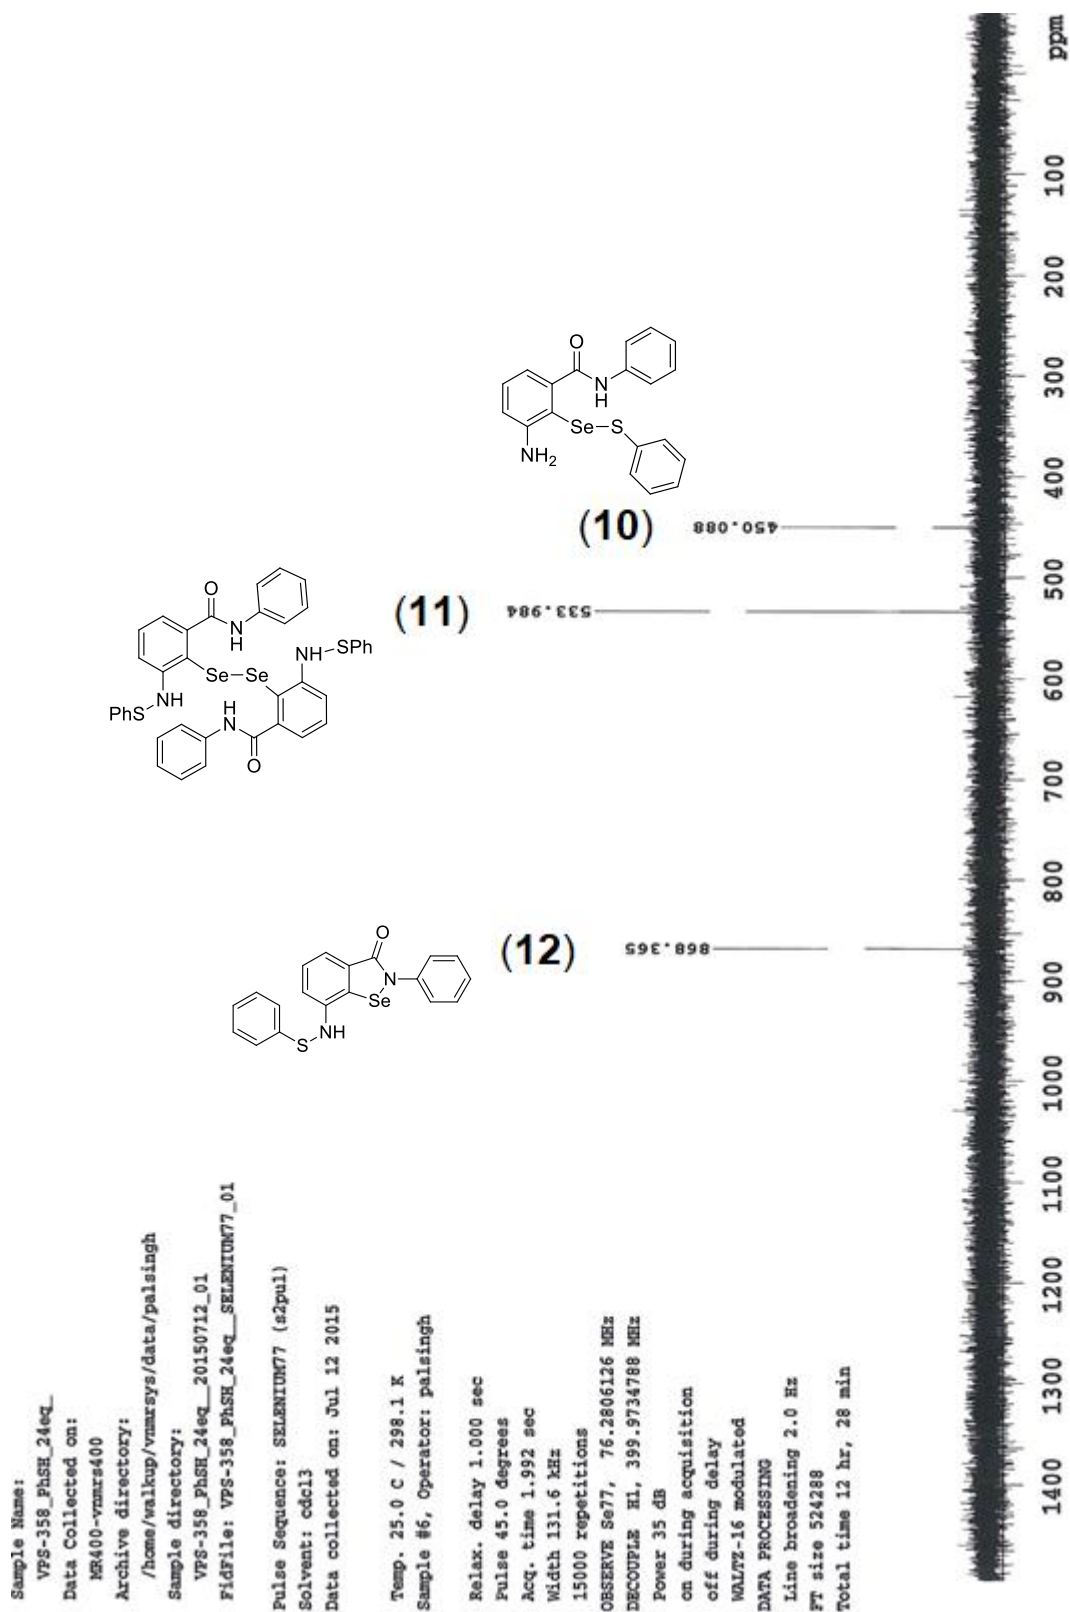



Figure S16. The  $^{77}\text{Se}\{^1\text{H}\}$  NMR spectrum of **8** with PhSH (24 equiv)

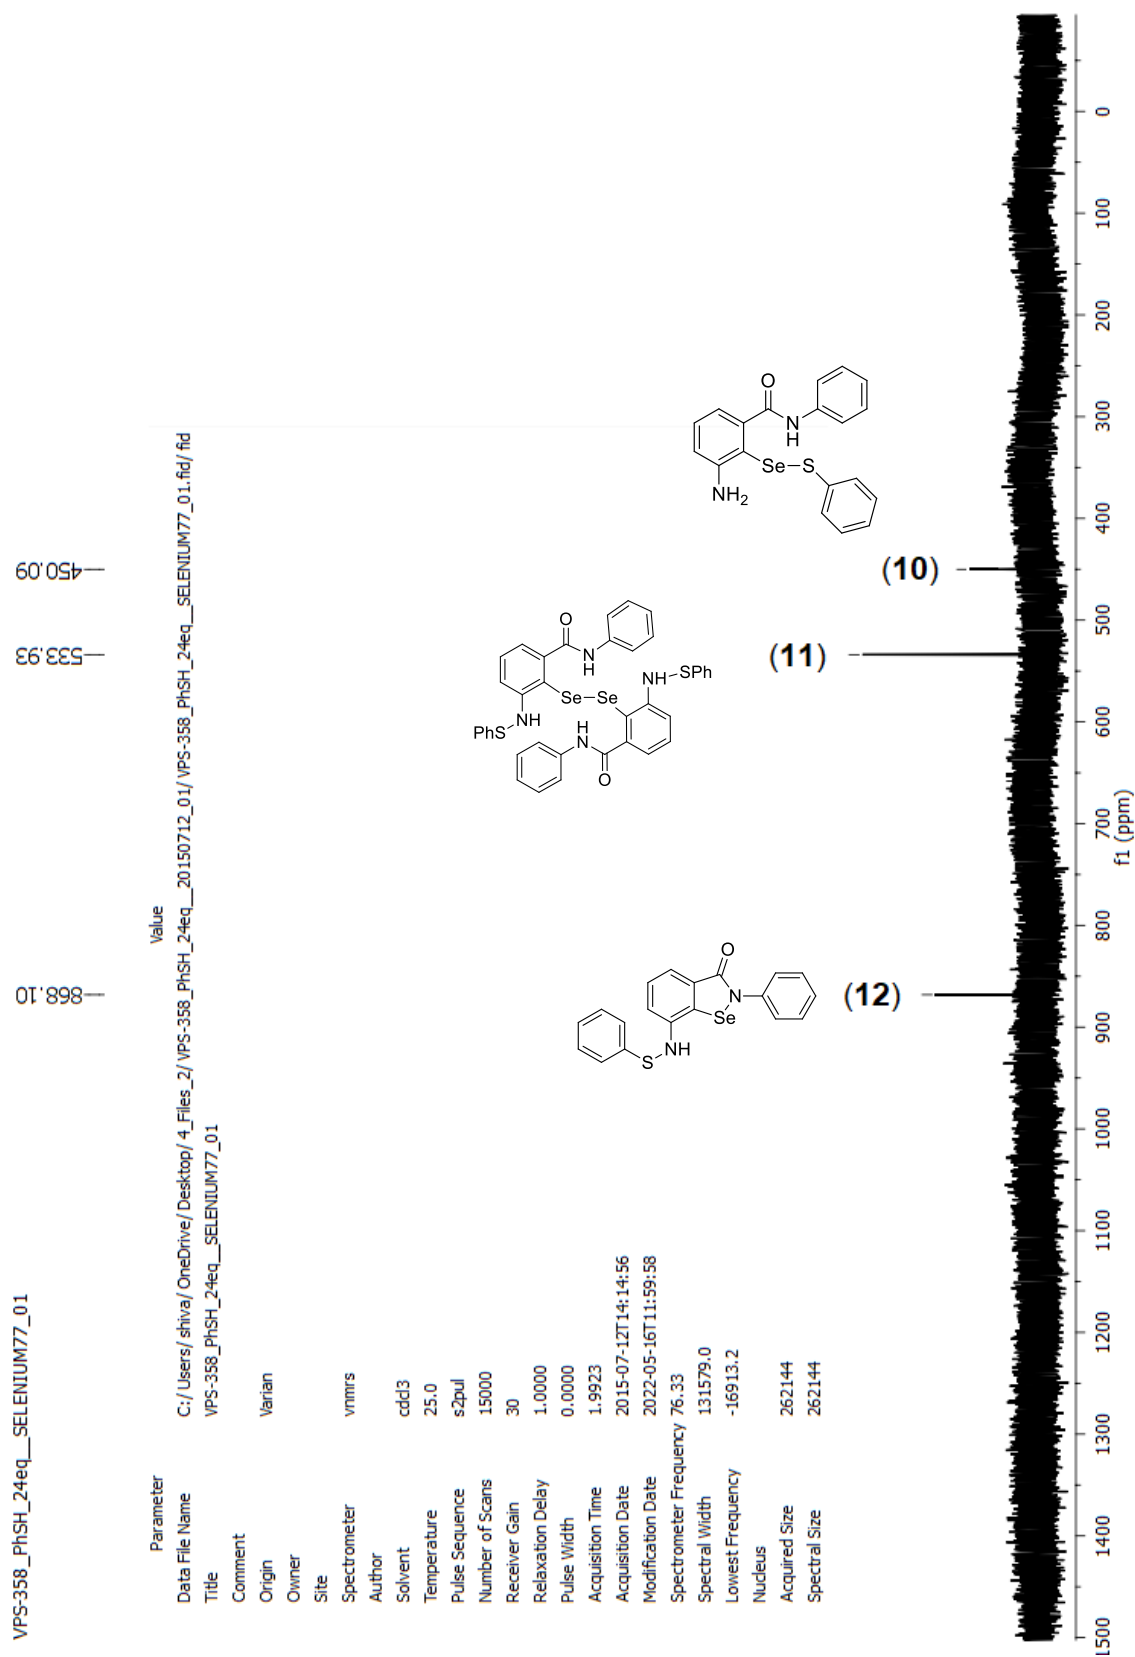

Figure S17. The  $^{77}\text{Se}\{^1\text{H}\}$  NMR spectrum of **8** with PhSH (24 equiv) and  $\text{H}_2\text{O}_2$  (6 equiv)

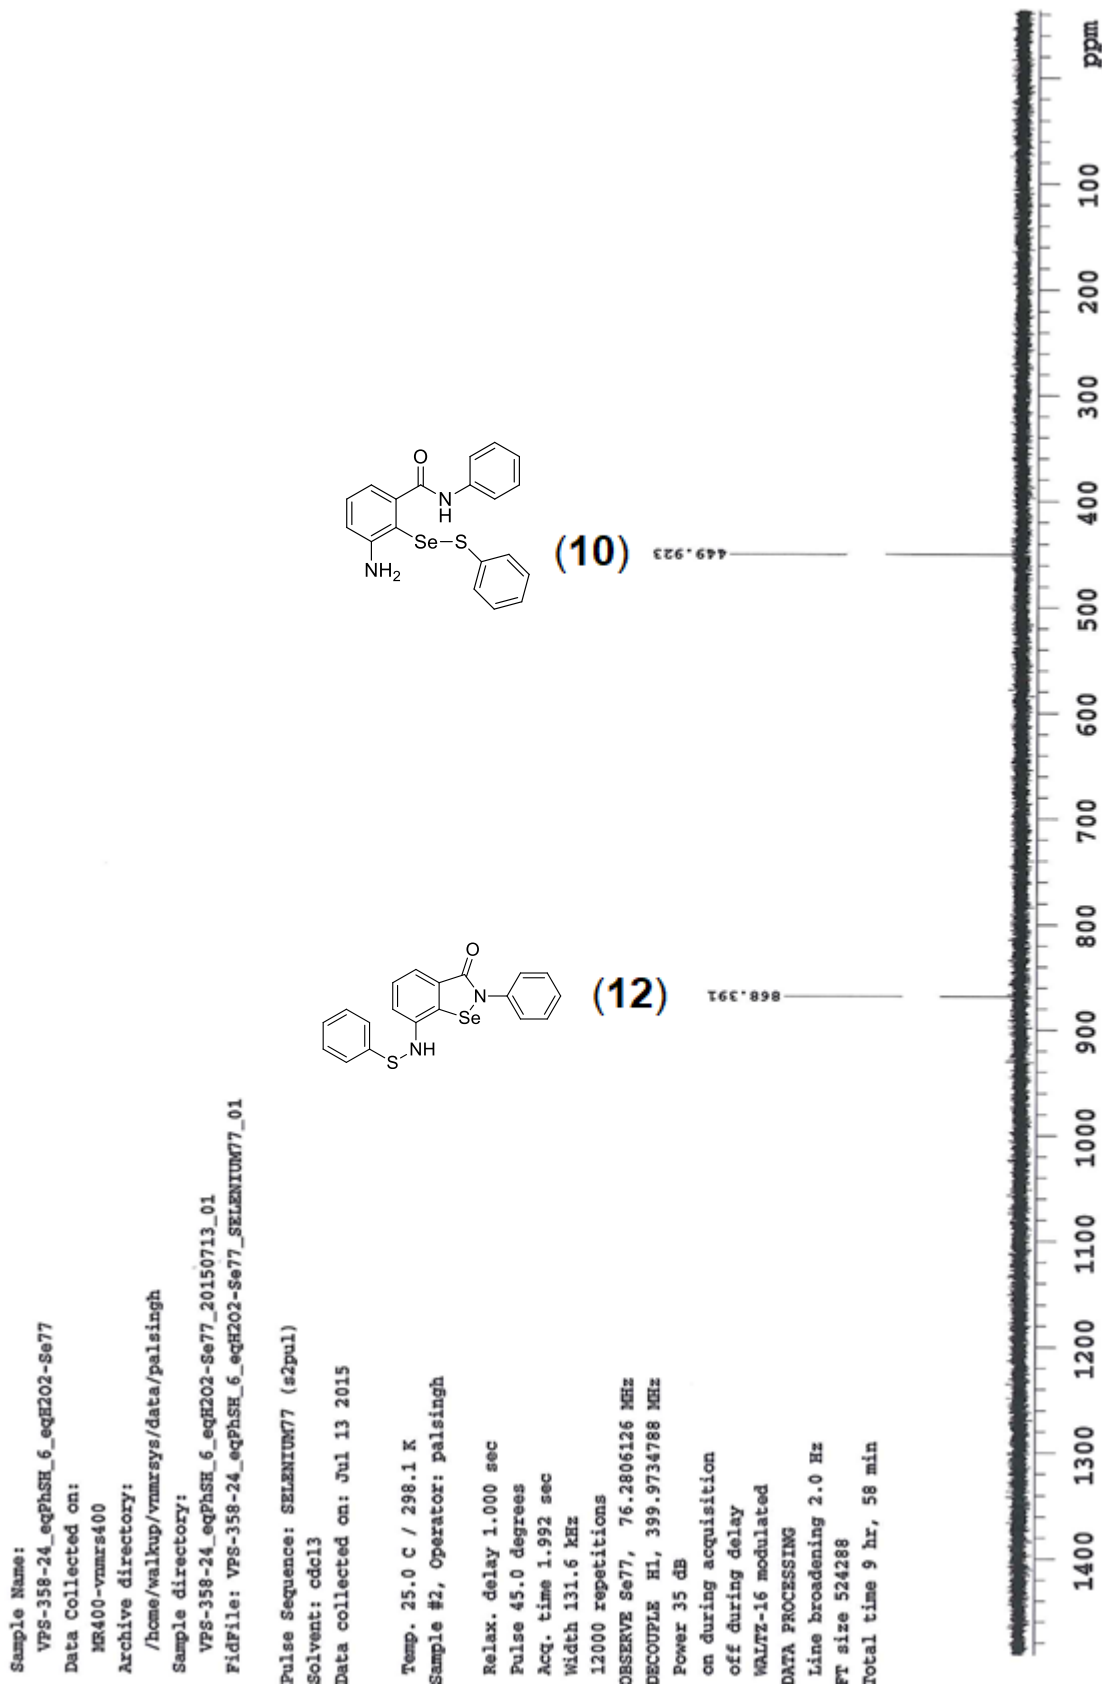

Figure S18.  $^{77}\text{Se}\{^1\text{H}\}$  NMR spectrum of **8** with PhSH (24 equiv) and  $\text{H}_2\text{O}_2$  (24 equiv)

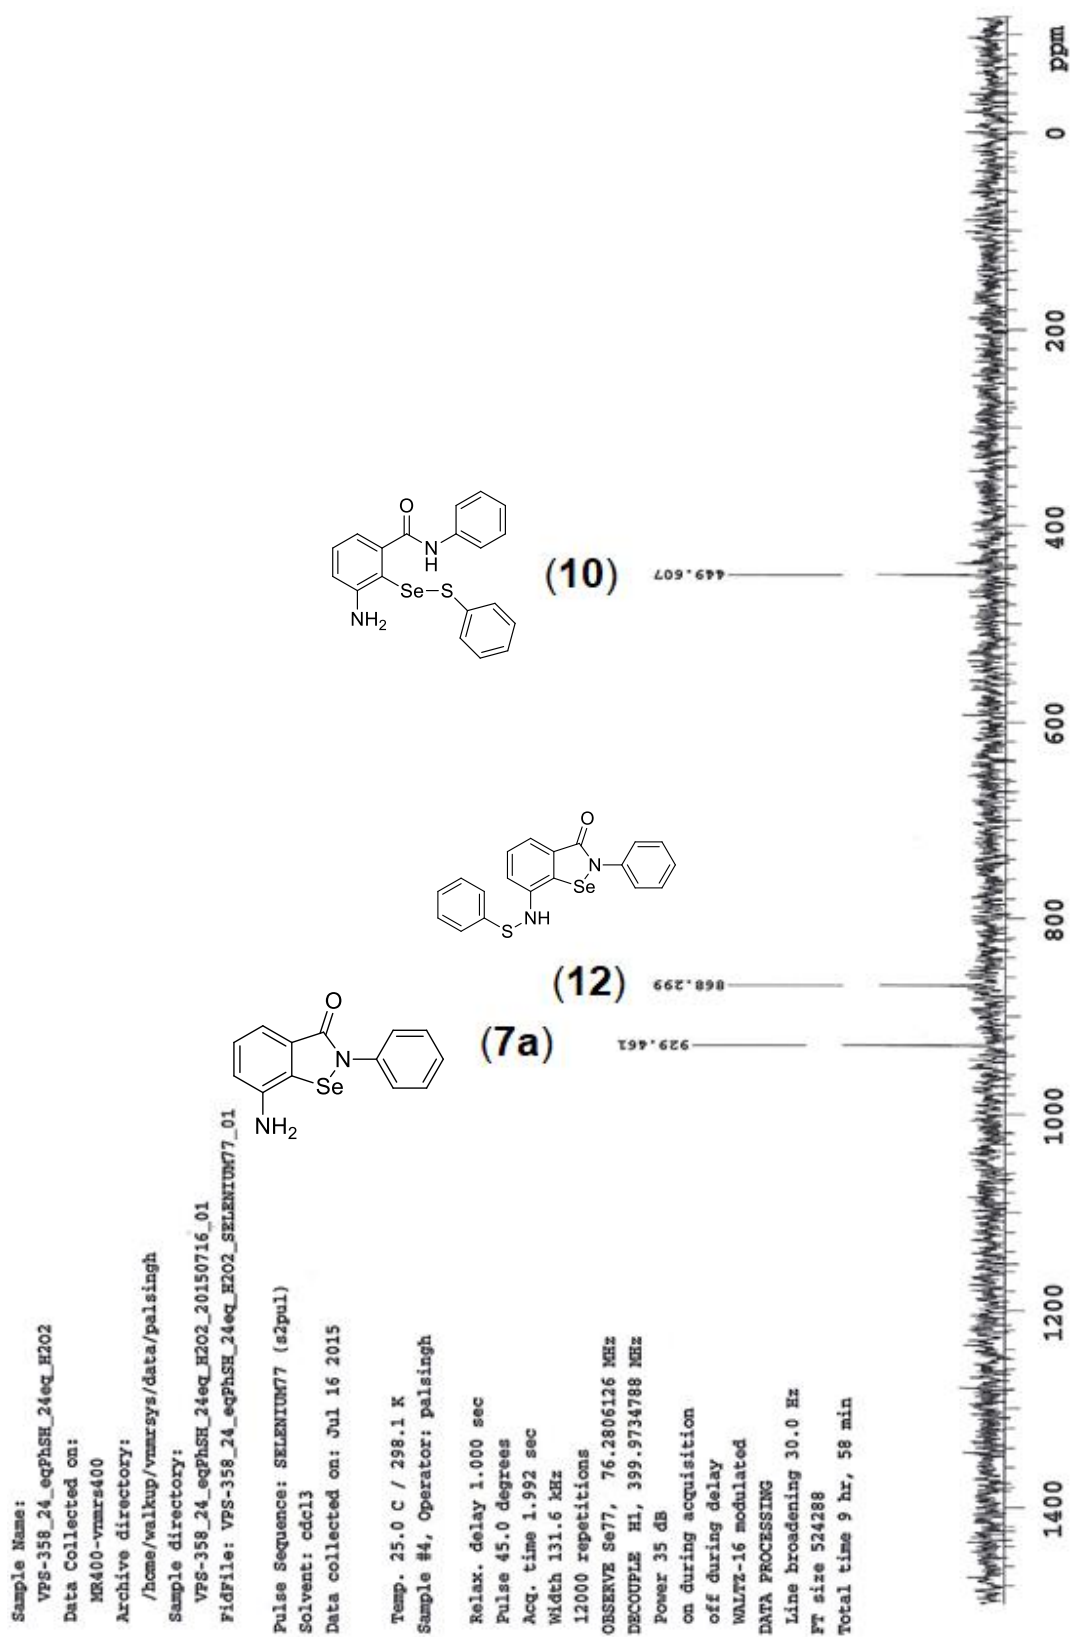

## Repeated mechanistic experiment of **8** with PhSH and H<sub>2</sub>O<sub>2</sub>

Figure S19. The <sup>77</sup>Se{<sup>1</sup>H} NMR spectrum of **8** with PhSH (8 equiv) in CDCl<sub>3</sub>

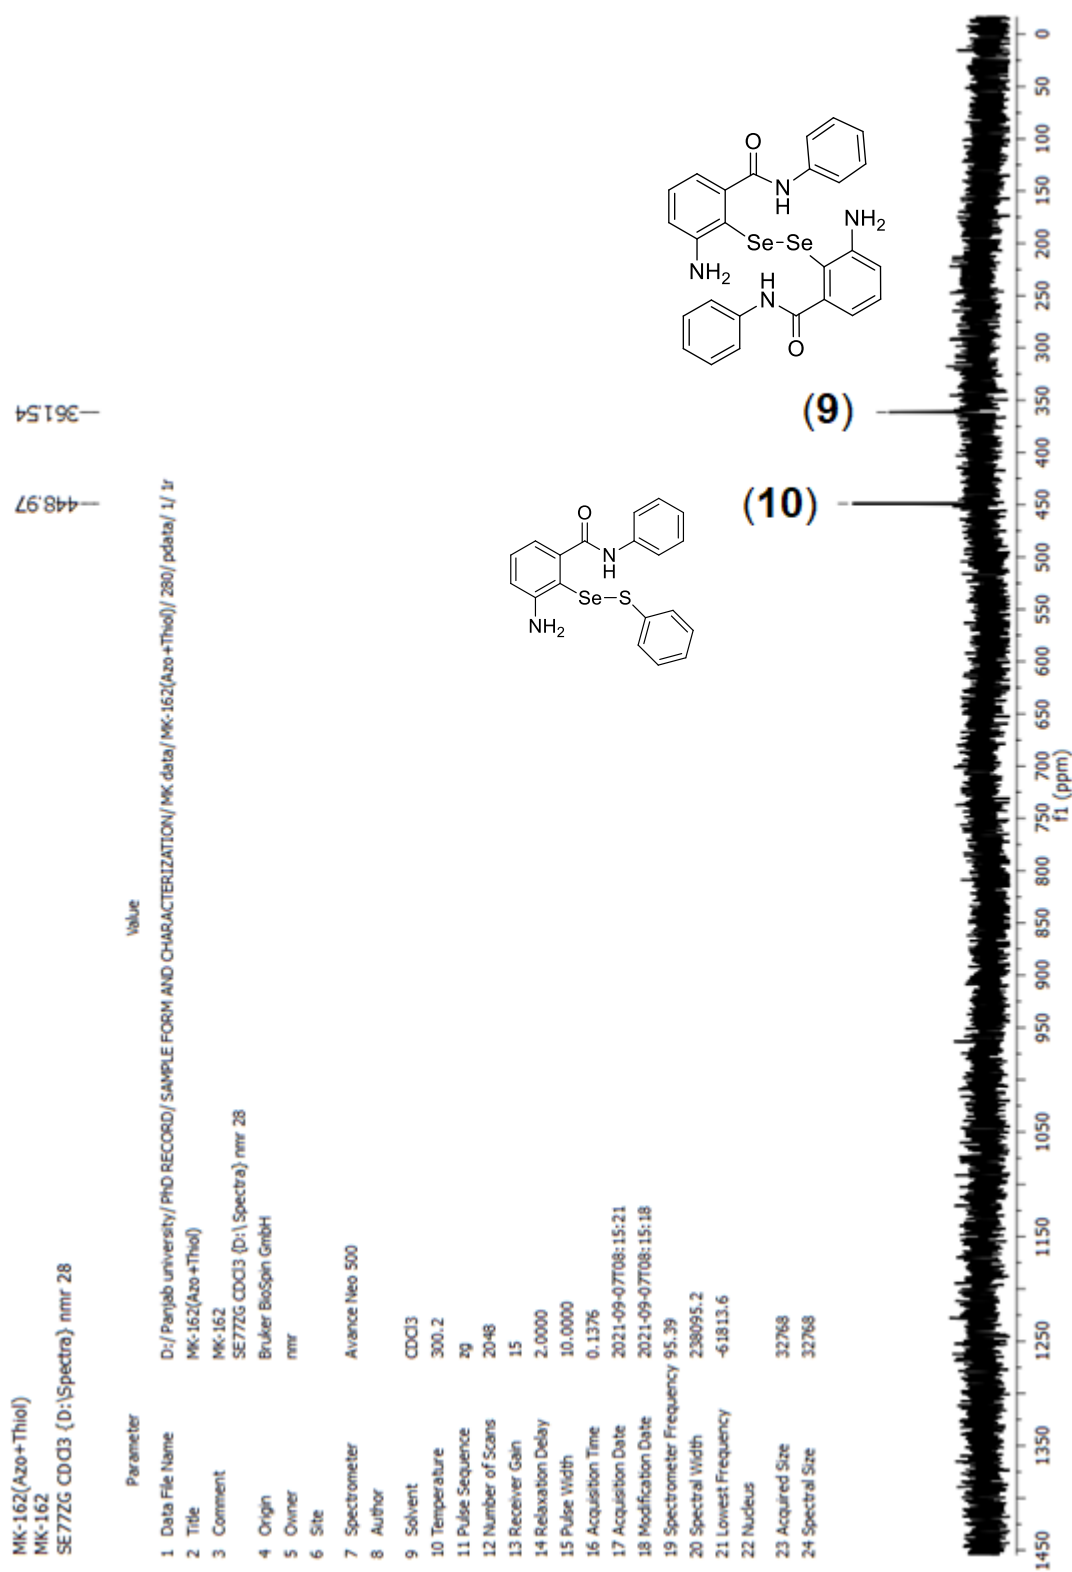

Figure S20. The  $^{77}\text{Se}\{^1\text{H}\}$  NMR of **8** and PhSH (8+8 equiv) in  $\text{CDCl}_3$

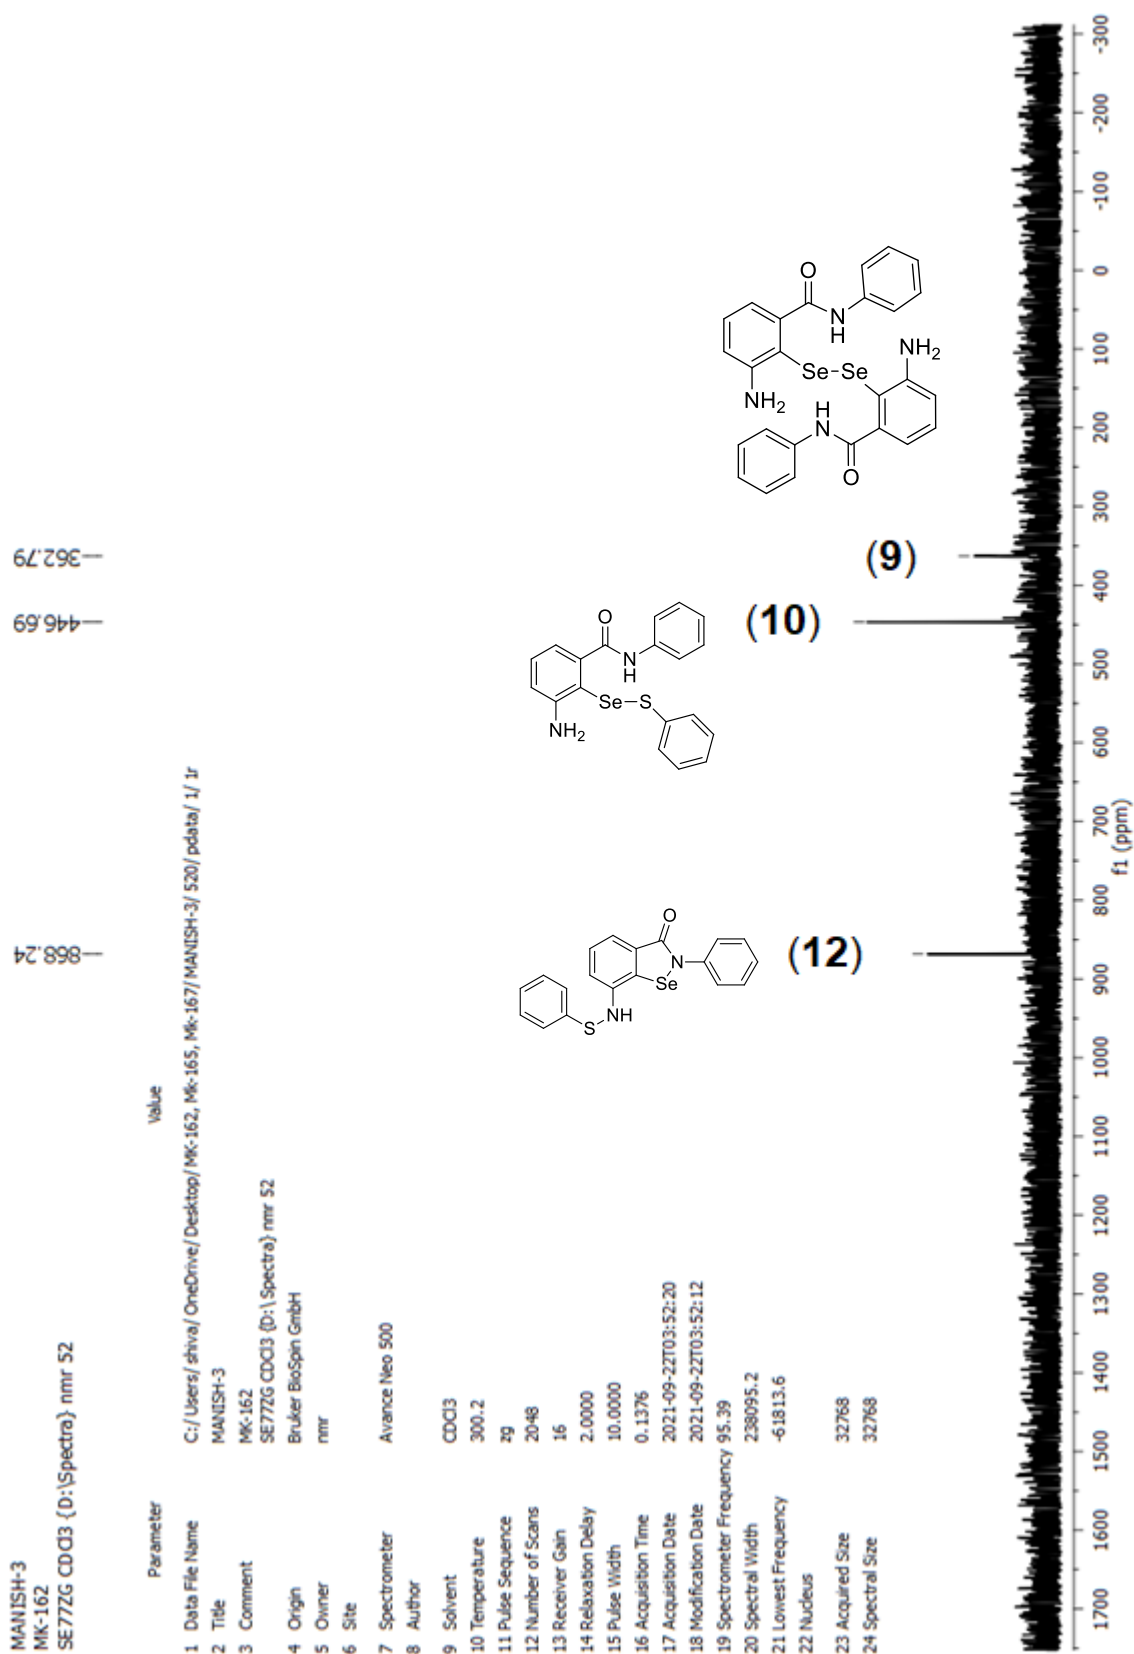

Figure S21. The  $^{77}\text{Se}\{^1\text{H}\}$  NMR of **8** with PhSH (16 equiv) +  $\text{H}_2\text{O}_2$  (4 equiv) in  $\text{CDCl}_3$

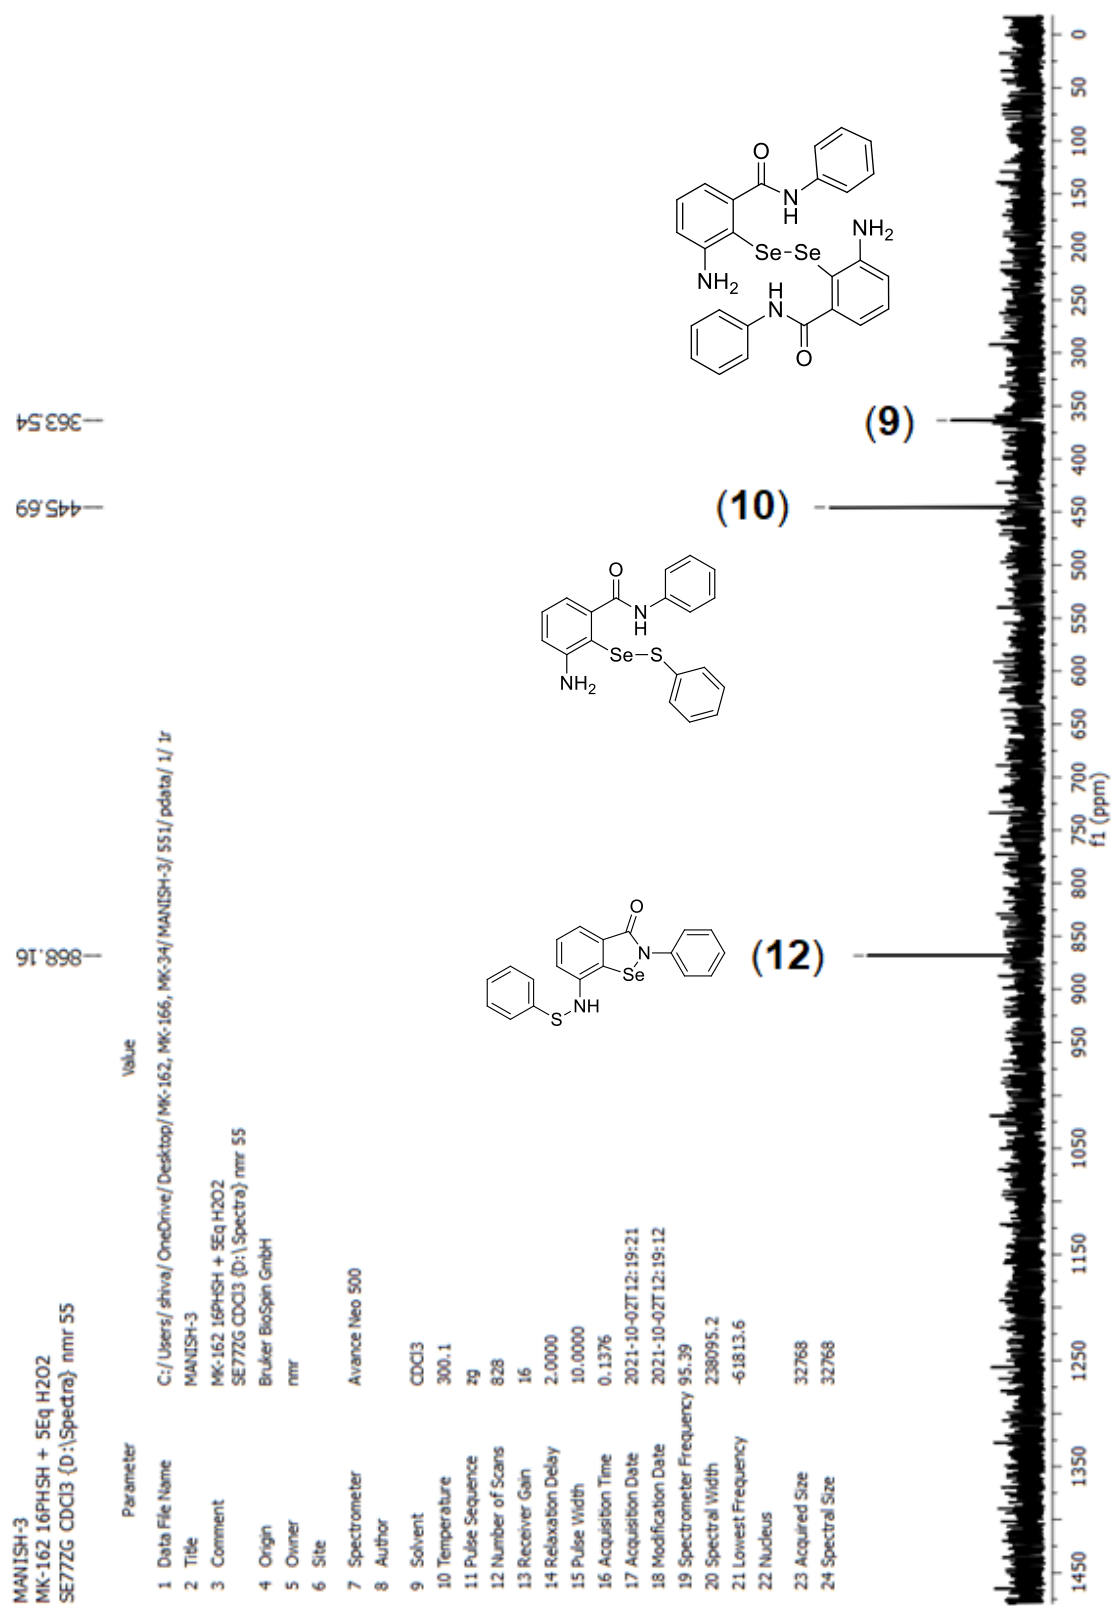

Figure S22. The  $^{77}\text{Se}\{^1\text{H}\}$  NMR of **8** with PhSH (16 equiv) +  $\text{H}_2\text{O}_2$  (6 equiv) in  $\text{CDCl}_3$

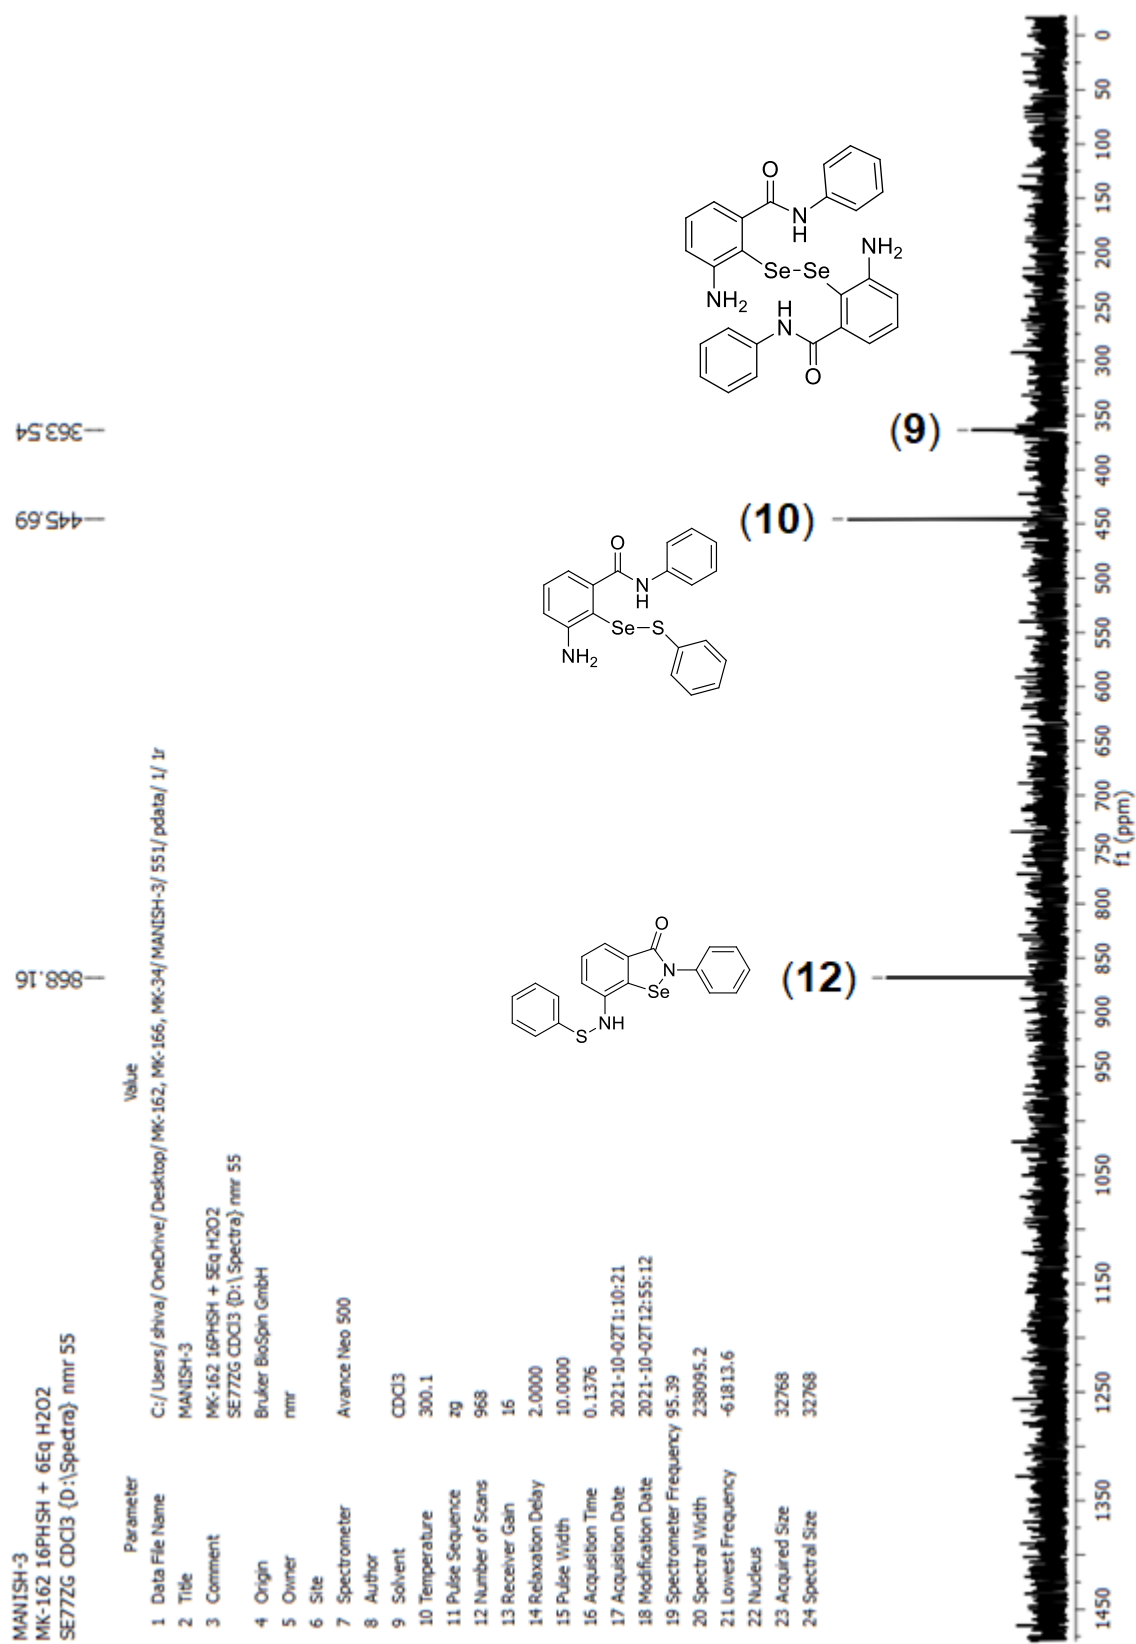

Figure S23. The  $^{77}\text{Se}\{^1\text{H}\}$  NMR of **8** with PhSH (16 equiv) +  $\text{H}_2\text{O}_2$  (8 equiv) in  $\text{CDCl}_3$

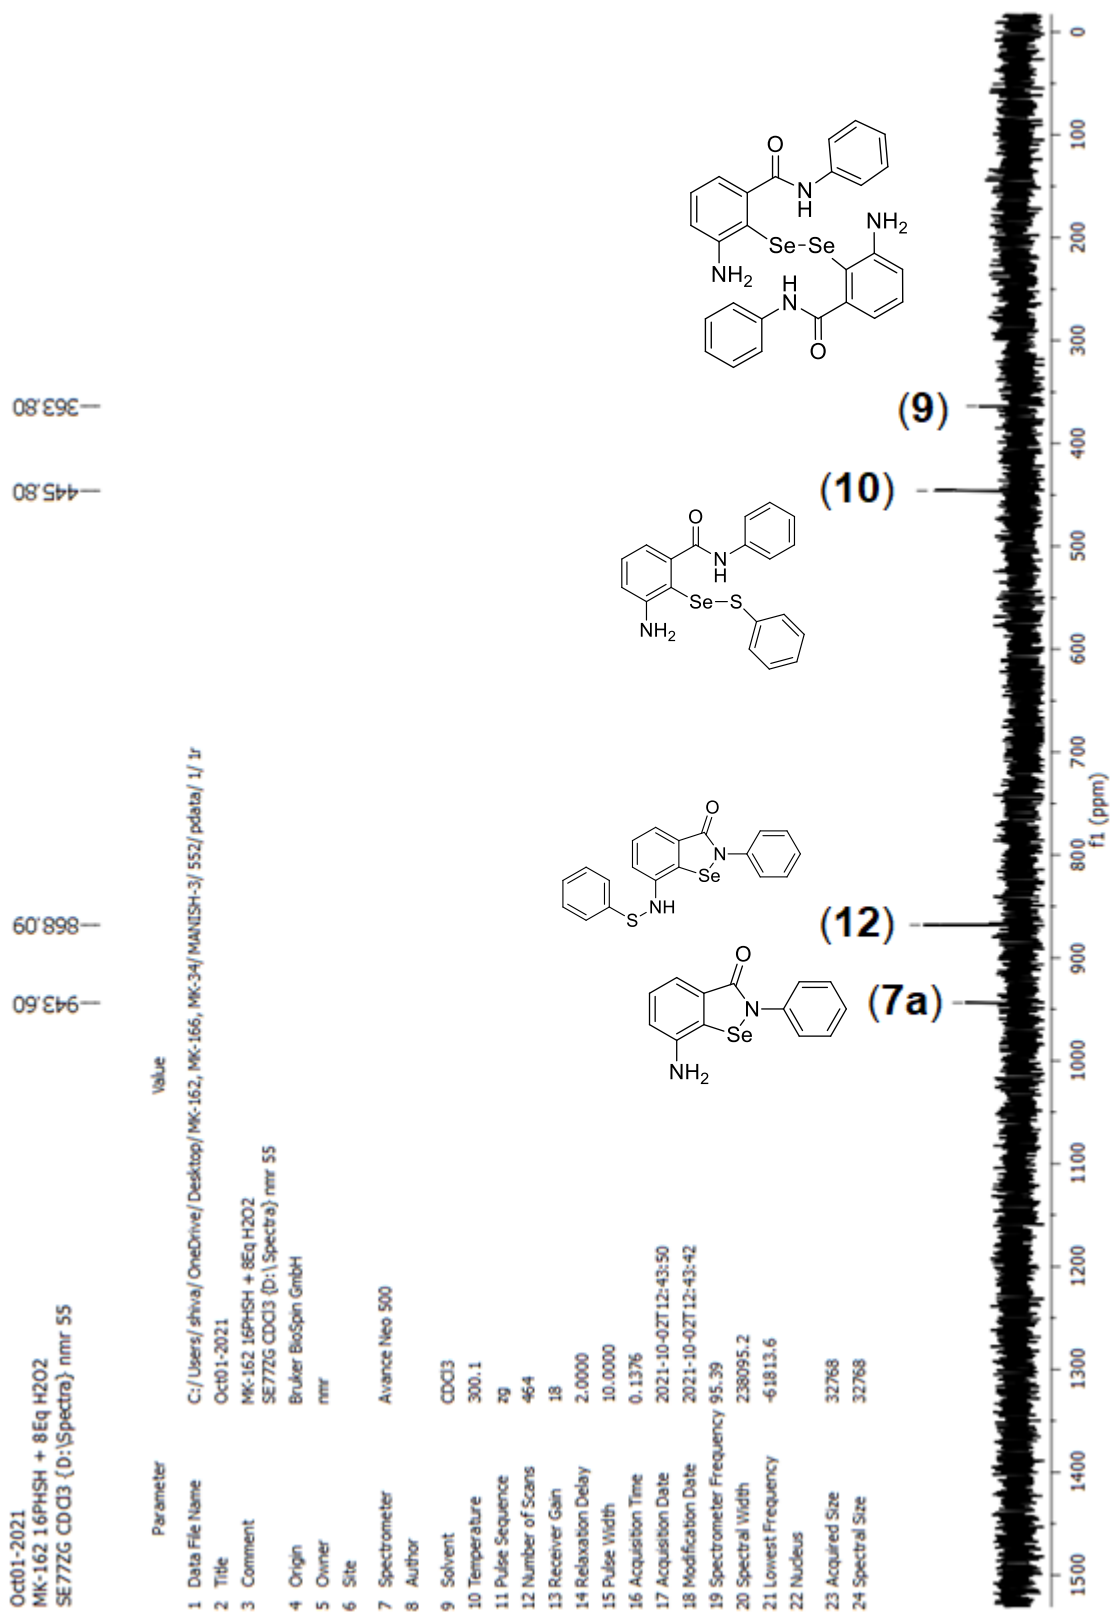



## Mechanistic Studies of Diselenide **9** with PhSH and H<sub>2</sub>O<sub>2</sub>

Figure S24. The <sup>77</sup>Se{<sup>1</sup>H} NMR spectrum of diselenide **9**

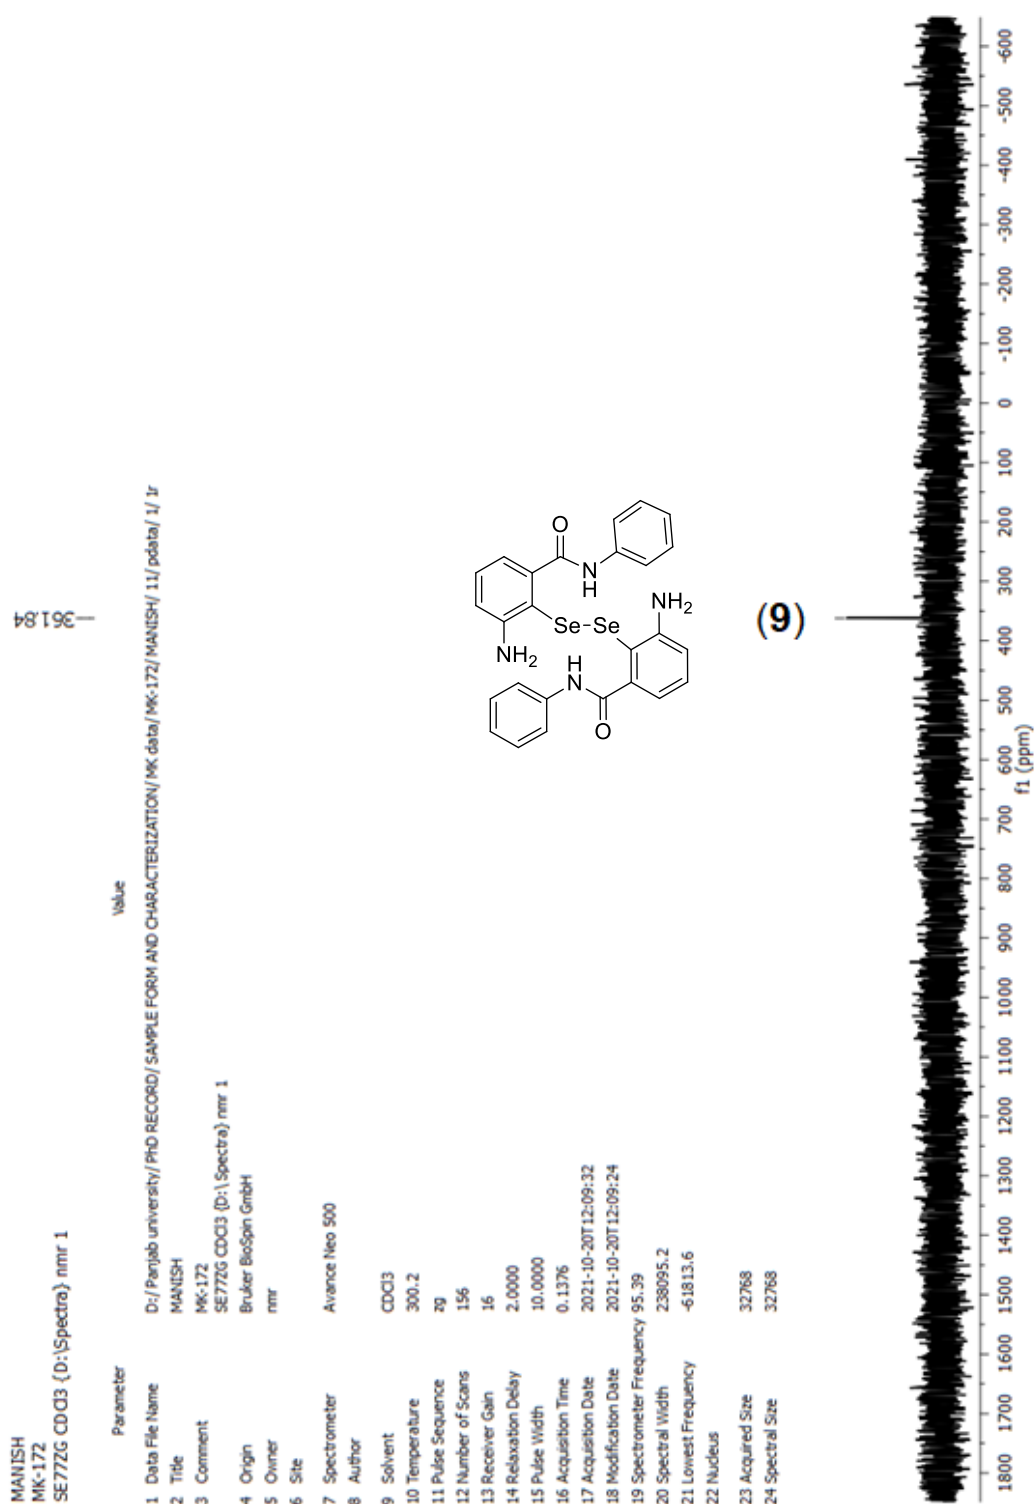

Figure S25. The  $^{77}\text{Se}\{^1\text{H}\}$  NMR spectrum of diselenide **9** + PhSH (1 equiv)

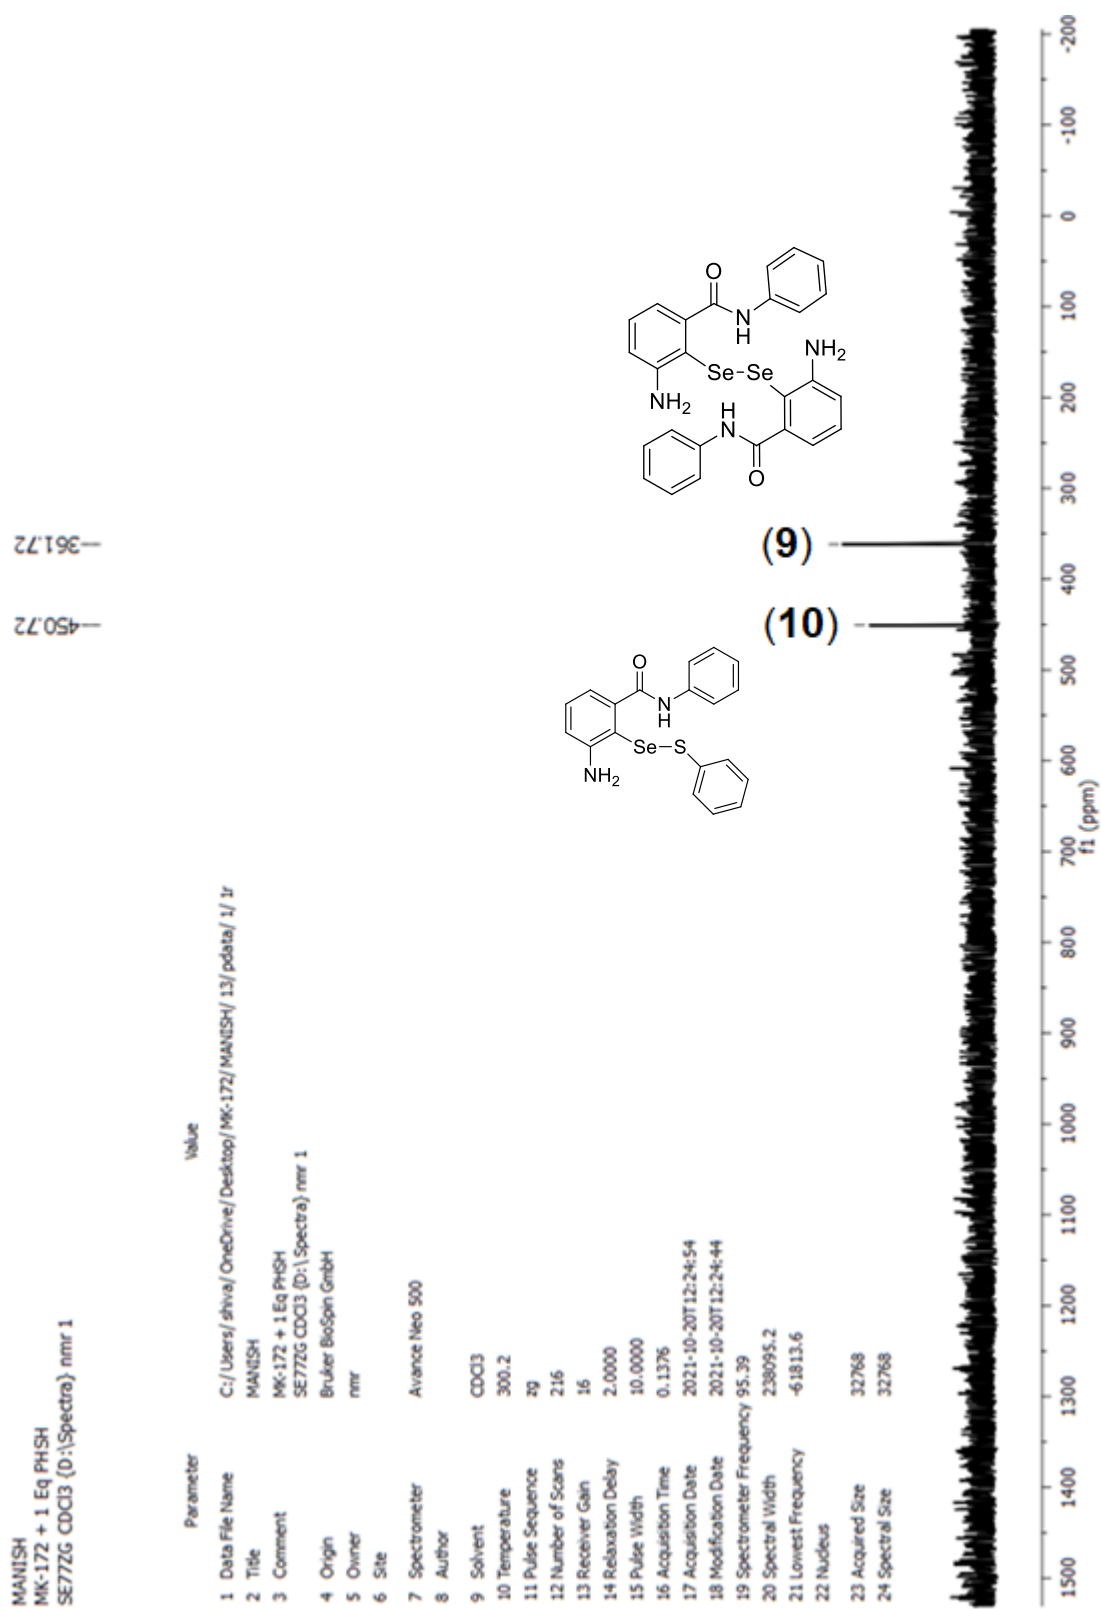

Figure S26. The  $^{77}\text{Se}\{^1\text{H}\}$  NMR spectrum of diselenide **9** + PhSH (2 equiv)

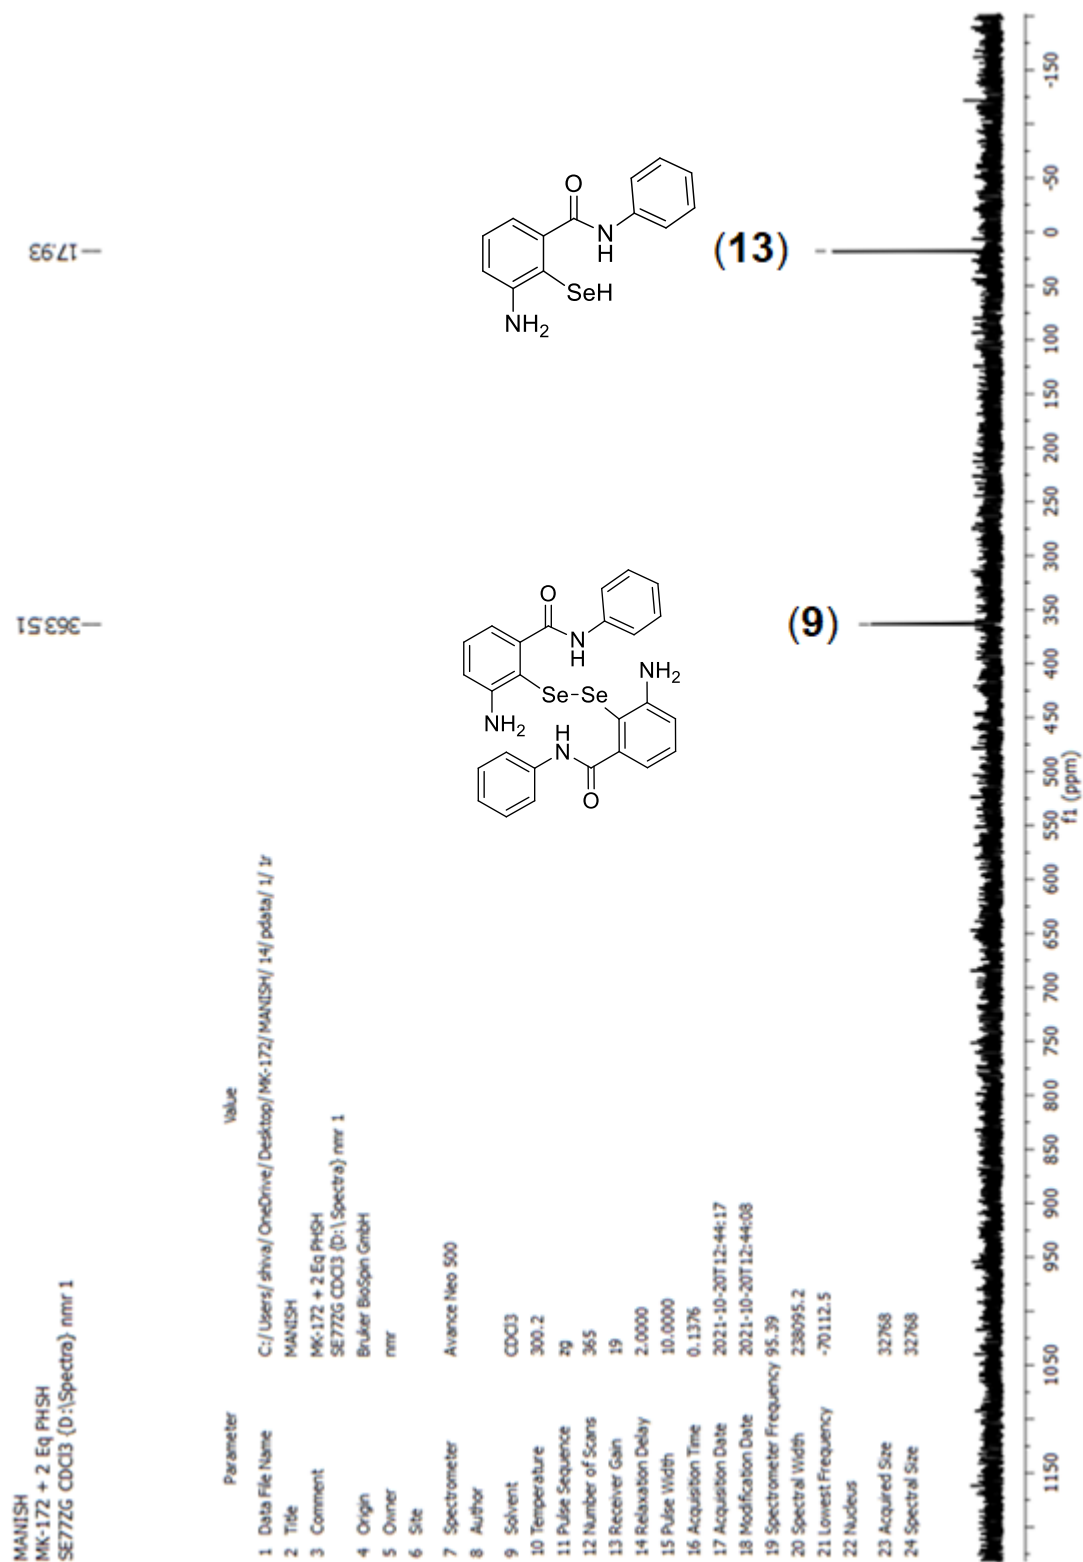

Figure S27. The  $^{77}\text{Se}\{^1\text{H}\}$  NMR spectrum of diselenide **9** + PhSH (4 equiv)

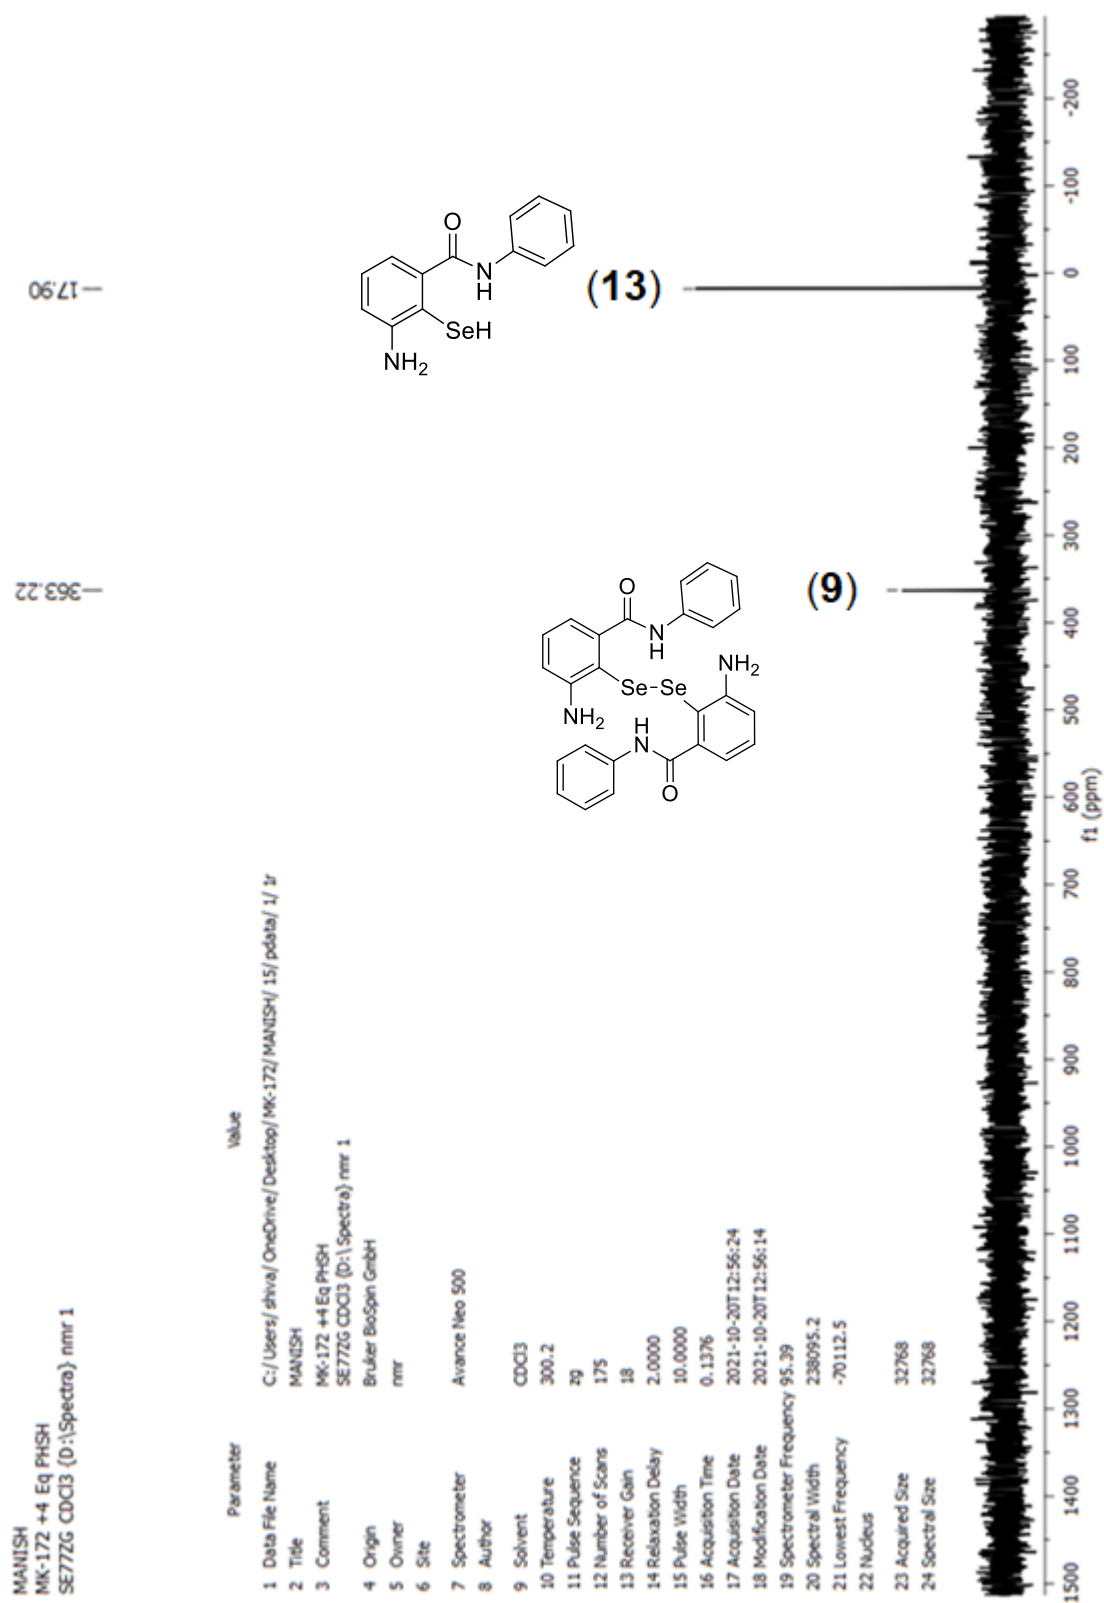

Figure S28. The  $^{77}\text{Se}\{^1\text{H}\}$  NMR spectrum of diselenide **9** + PhSH (4 equiv) +  $\text{H}_2\text{O}_2$  (2 equiv)

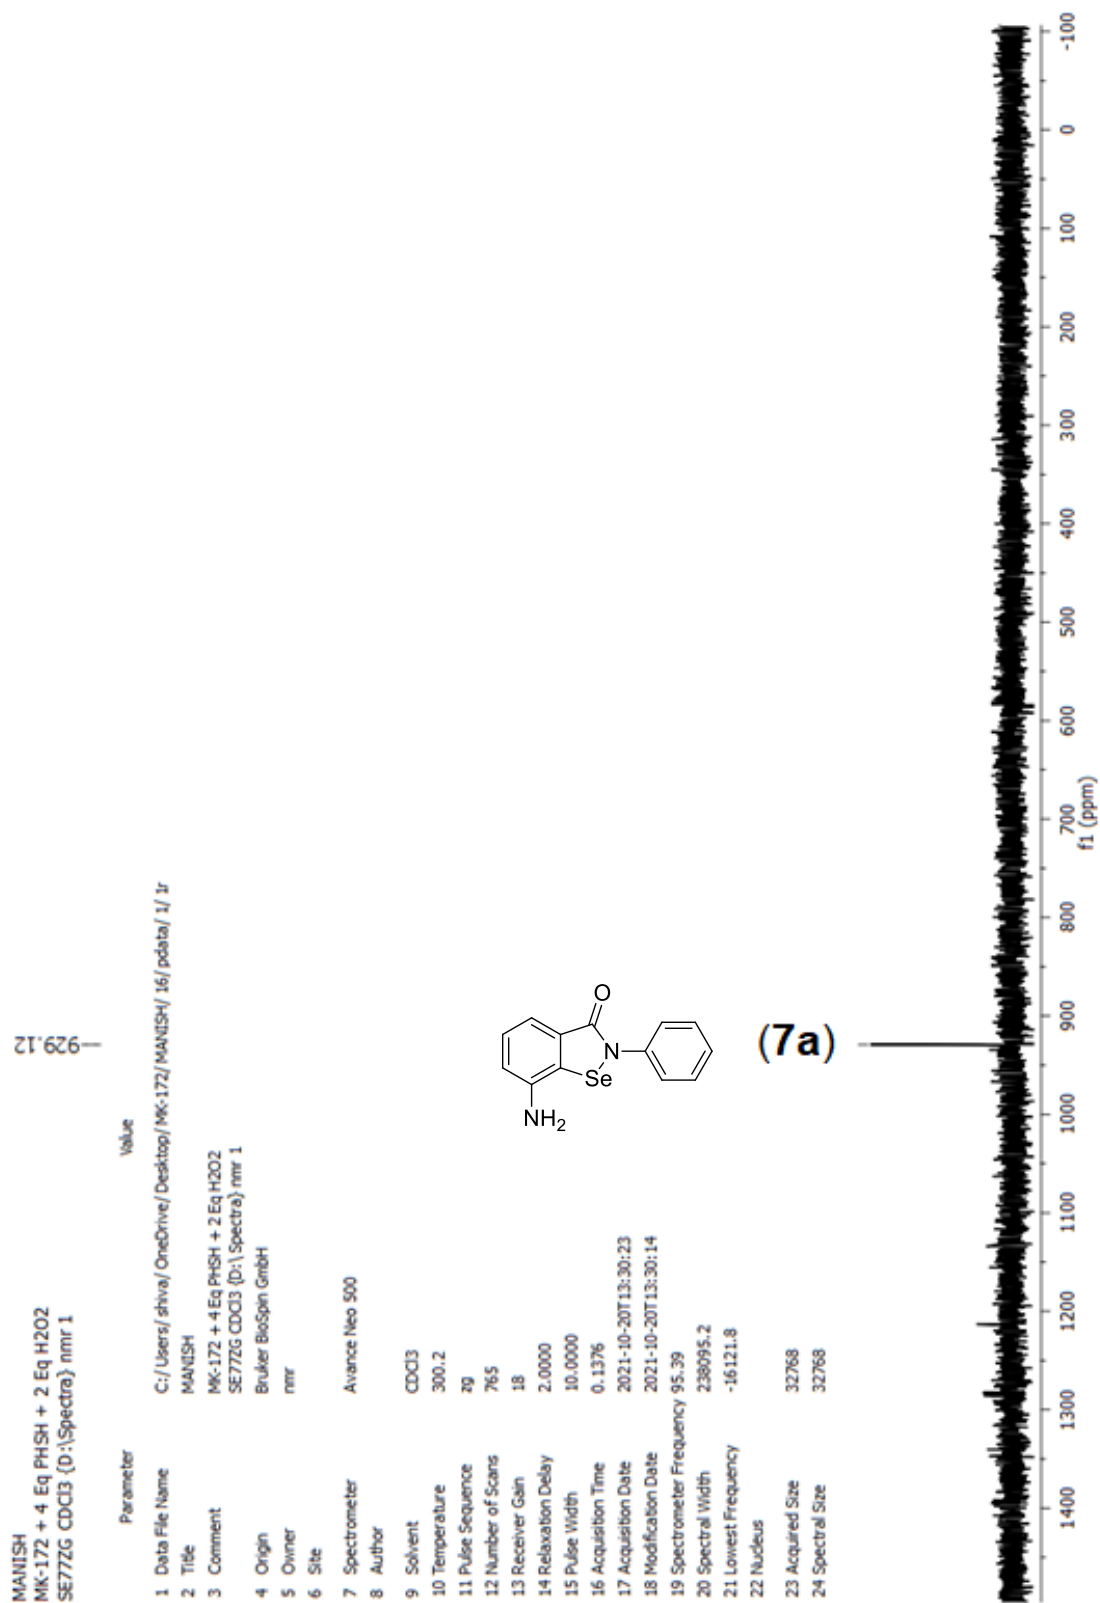

Figure S29. The  $^{77}\text{Se}\{^1\text{H}\}$  NMR spectrum of diselenide **9** + PhSH (4 equiv) +  $\text{H}_2\text{O}_2$  (2 equiv) recorded after 30 min

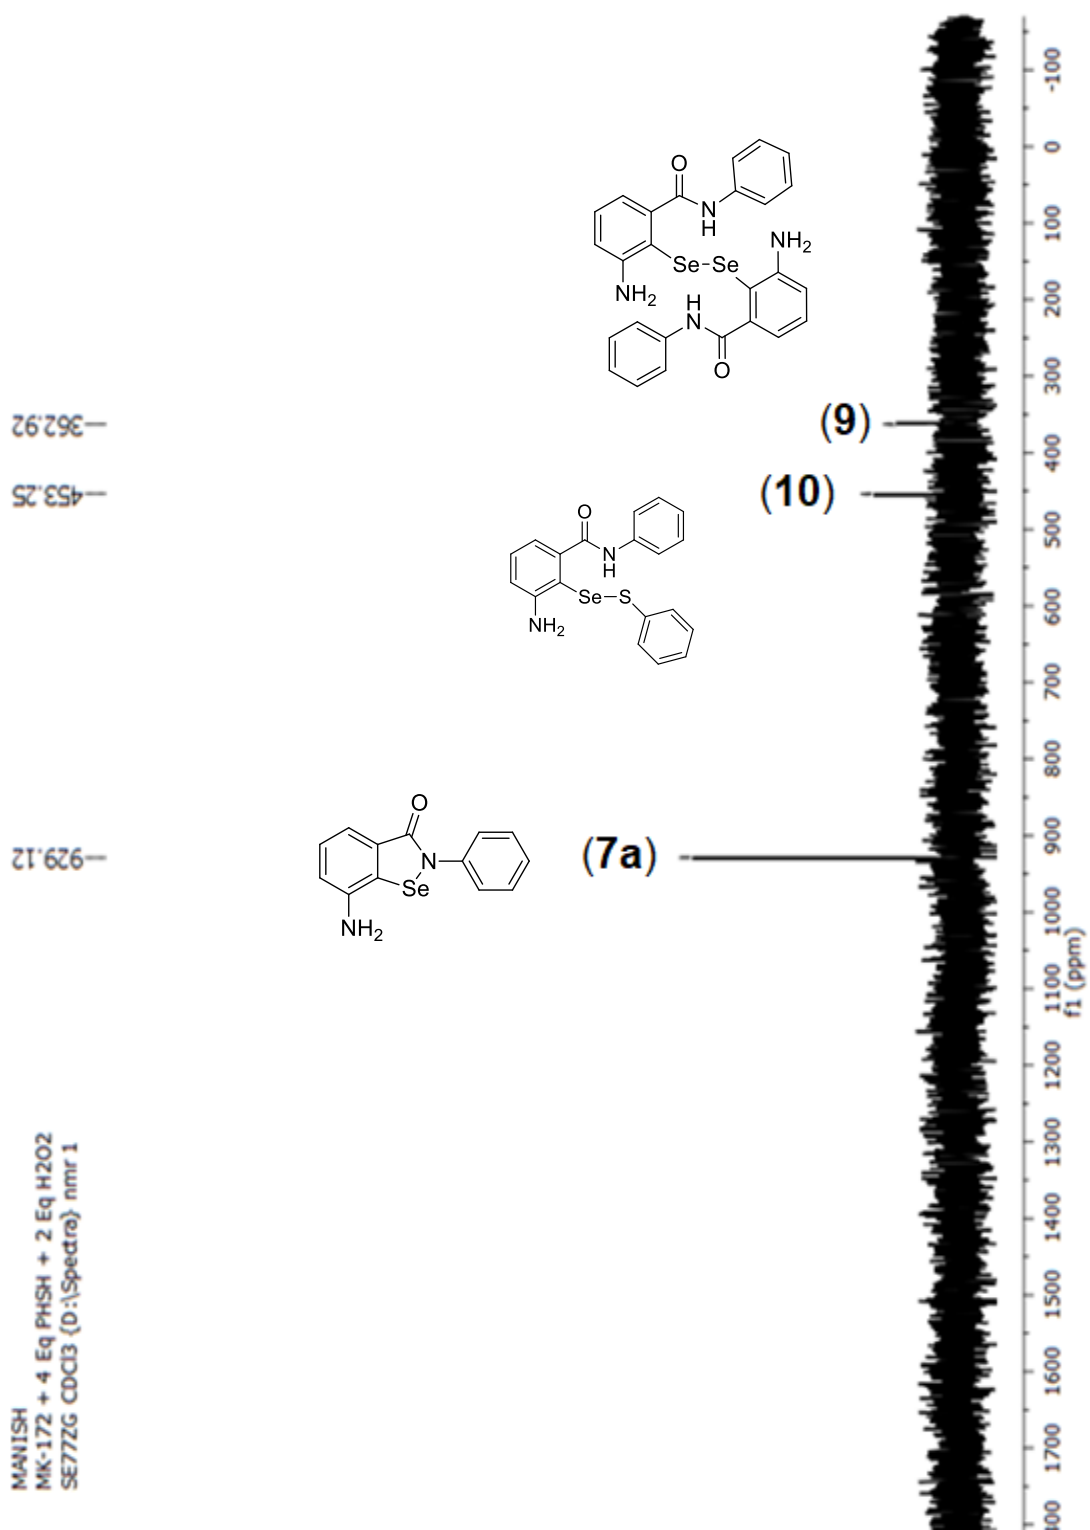

Figure S30. The  $^{77}\text{Se}\{^1\text{H}\}$  NMR of diselenide **9** + PhSH (4 equiv) +  $\text{H}_2\text{O}_2$  (2 equiv) + PhSH (2 equiv)

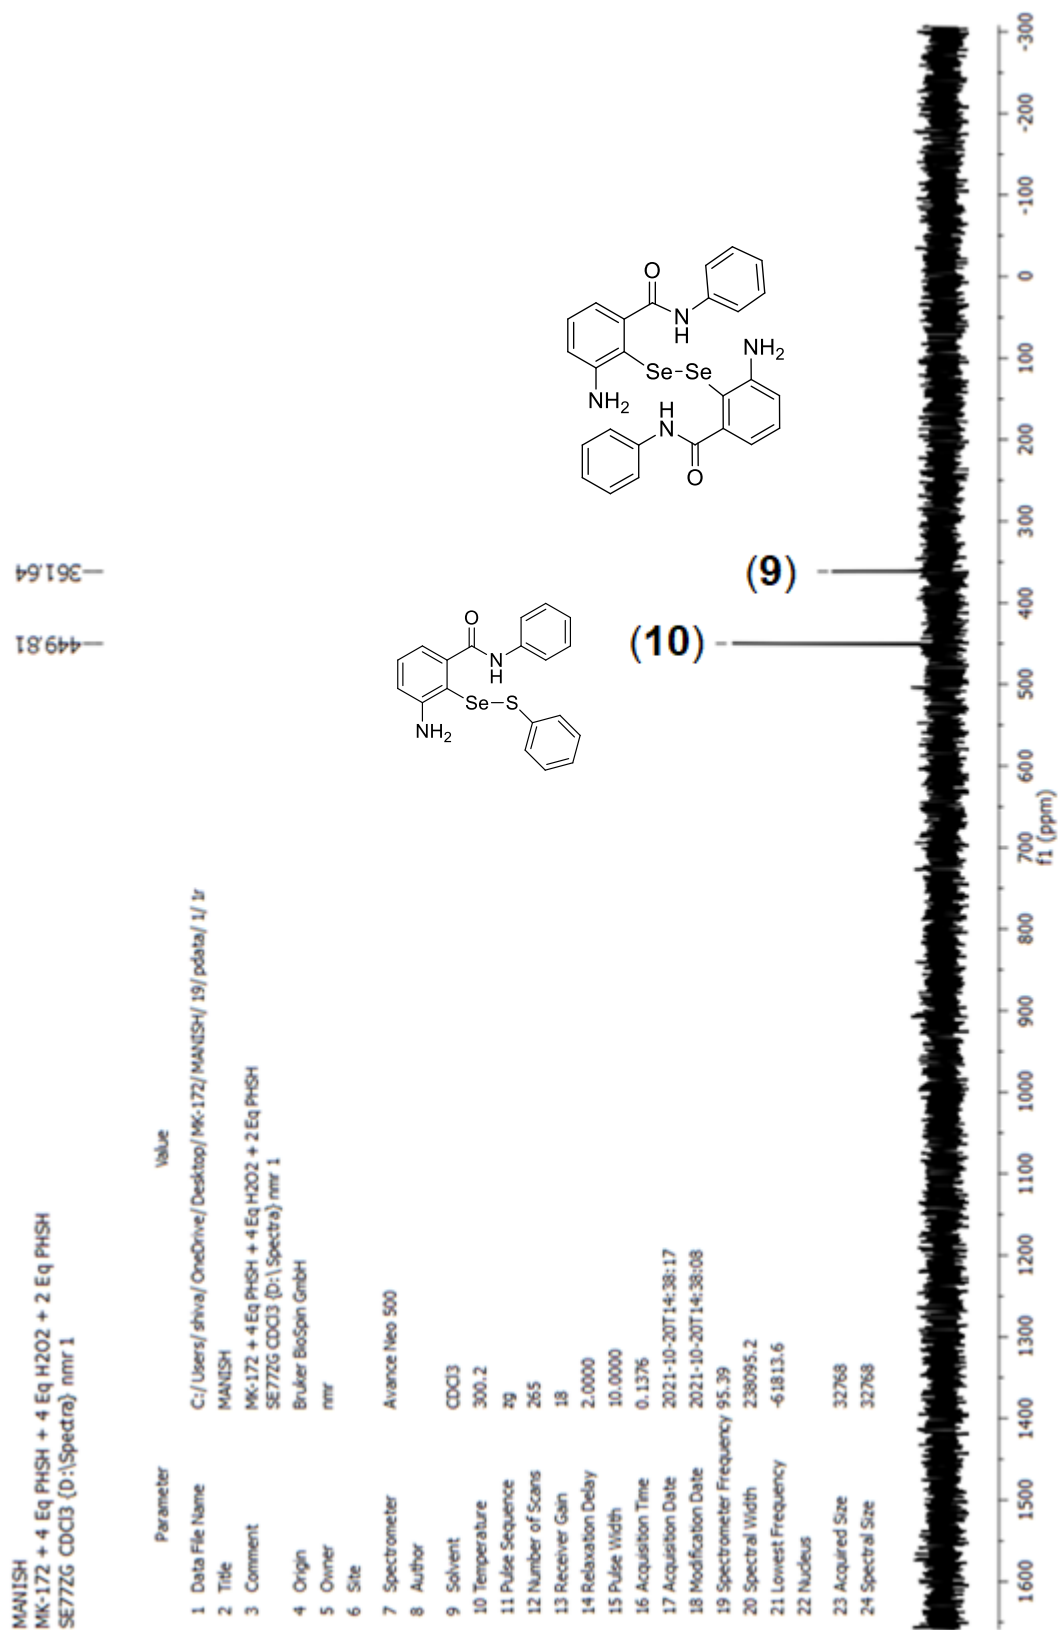

## Mechanistic Studies of Diselenide **9** with PhSSPh and H<sub>2</sub>O<sub>2</sub> in CDCl<sub>3</sub>

Figure S31. The <sup>77</sup>Se{<sup>1</sup>H} NMR spectrum of diselenide **9** + PhSSPh (3 equiv)

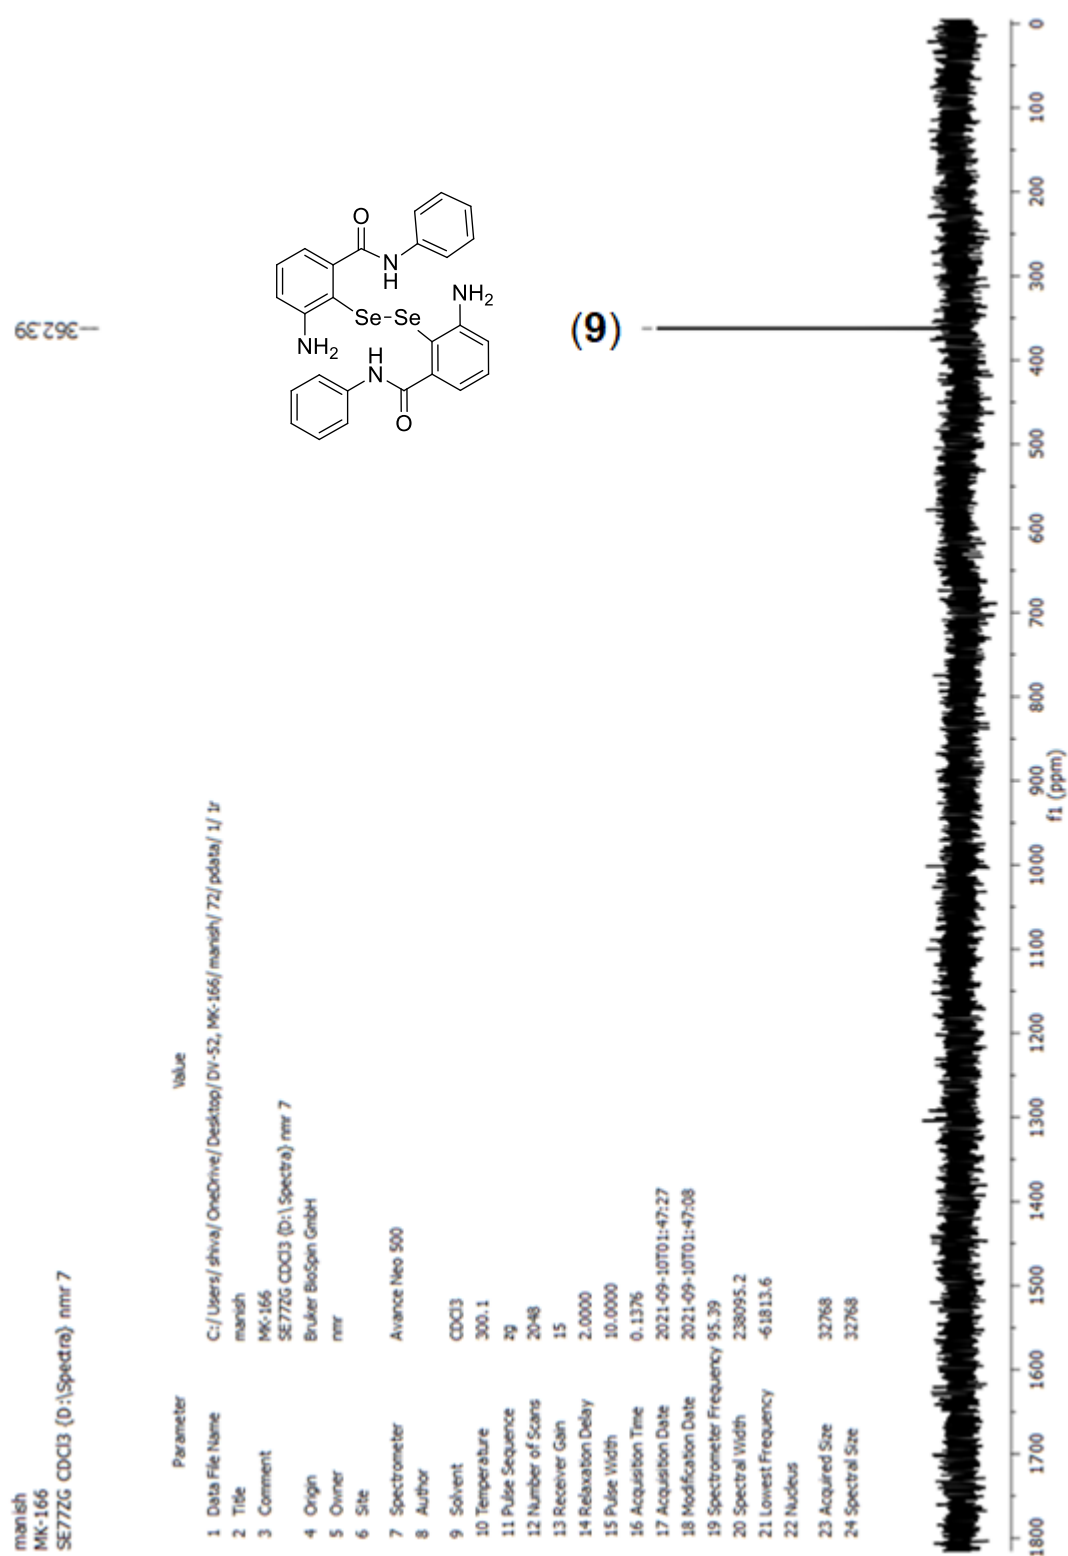



Figure S32. The  $^{77}\text{Se}\{^1\text{H}\}$  NMR spectrum of diselenide **9** + PhSSPh (3 equiv) +  $\text{H}_2\text{O}_2$  (1 equiv)

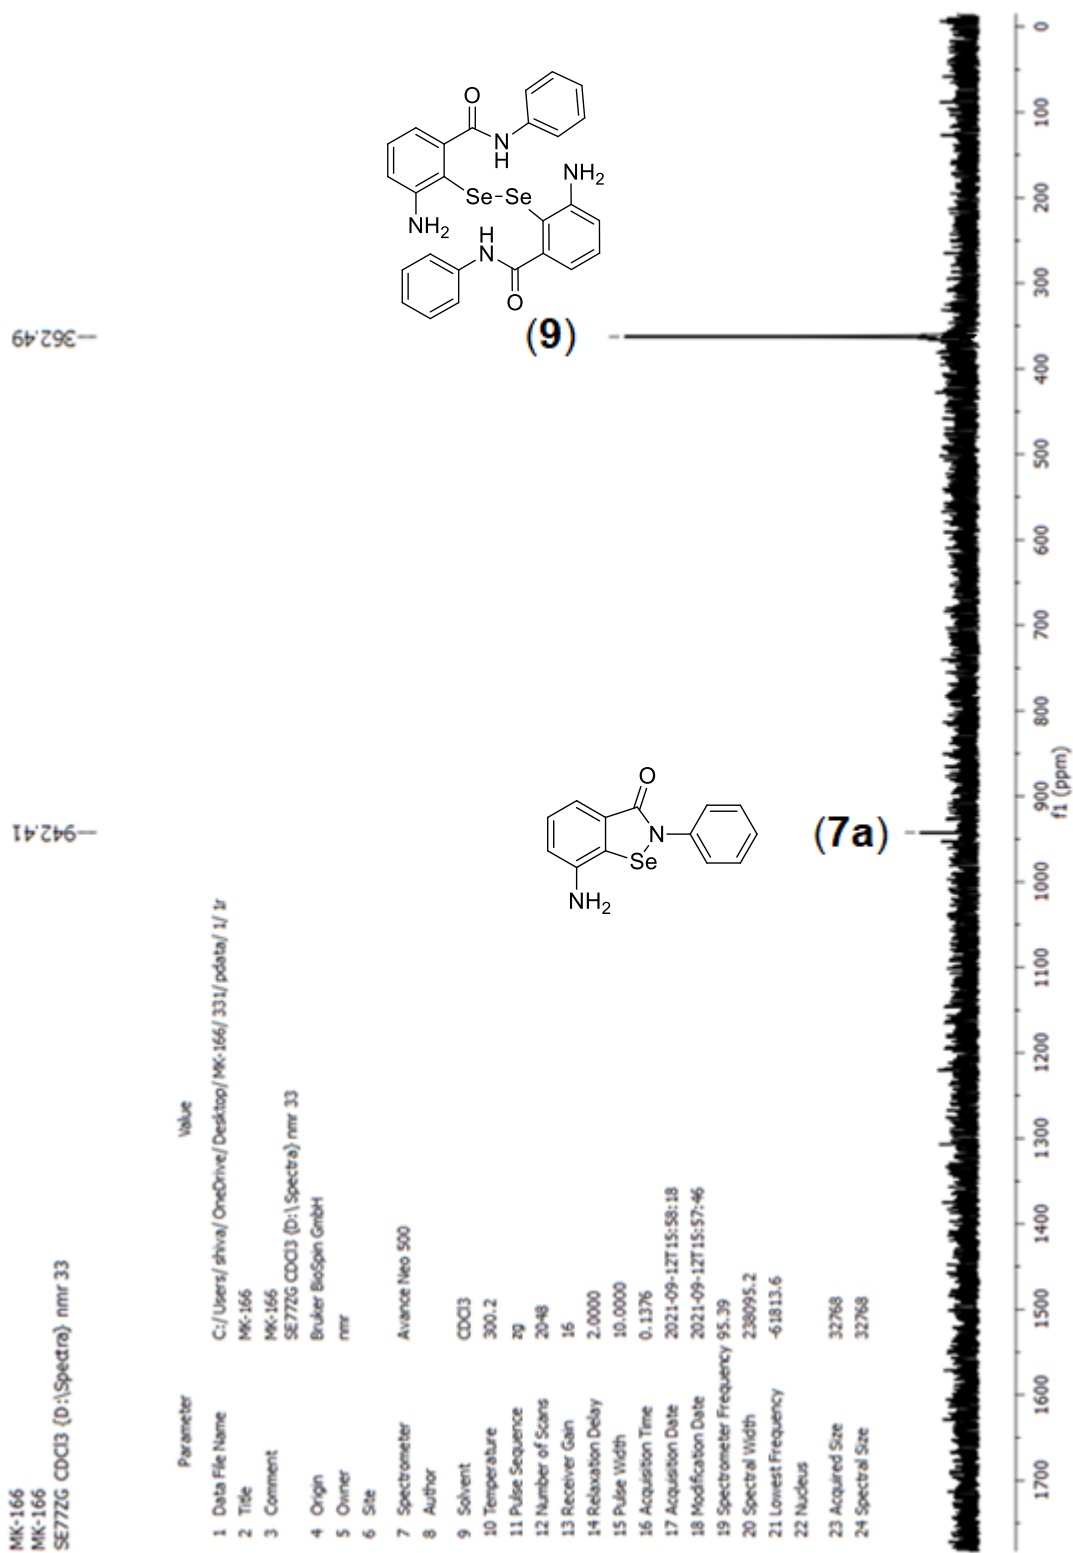

Figure S33. The  $^{77}\text{Se}\{^1\text{H}\}$  NMR of diselenide + PhSSPh + 1 equiv  $\text{H}_2\text{O}_2$  (recorded 2 days later)

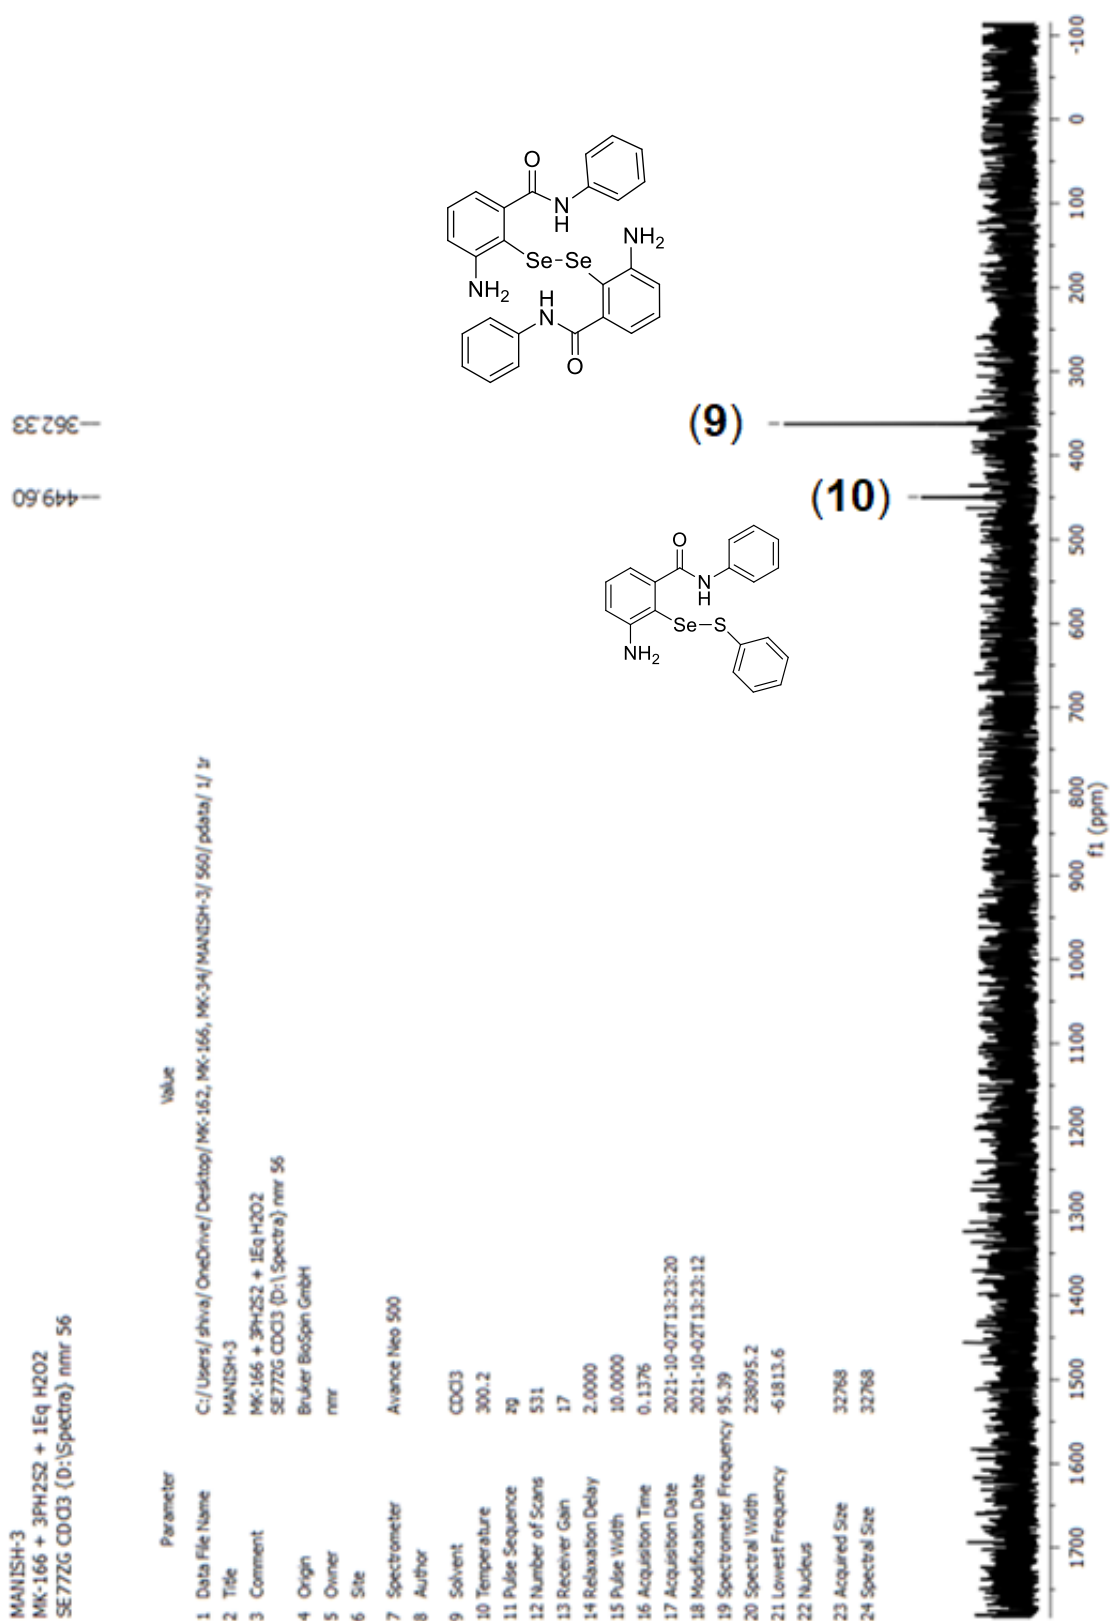

Figure S34. The  $^{77}\text{Se}\{^1\text{H}\}$  NMR of diselenide **9** + PhSSPh + 3 equiv  $\text{H}_2\text{O}_2$

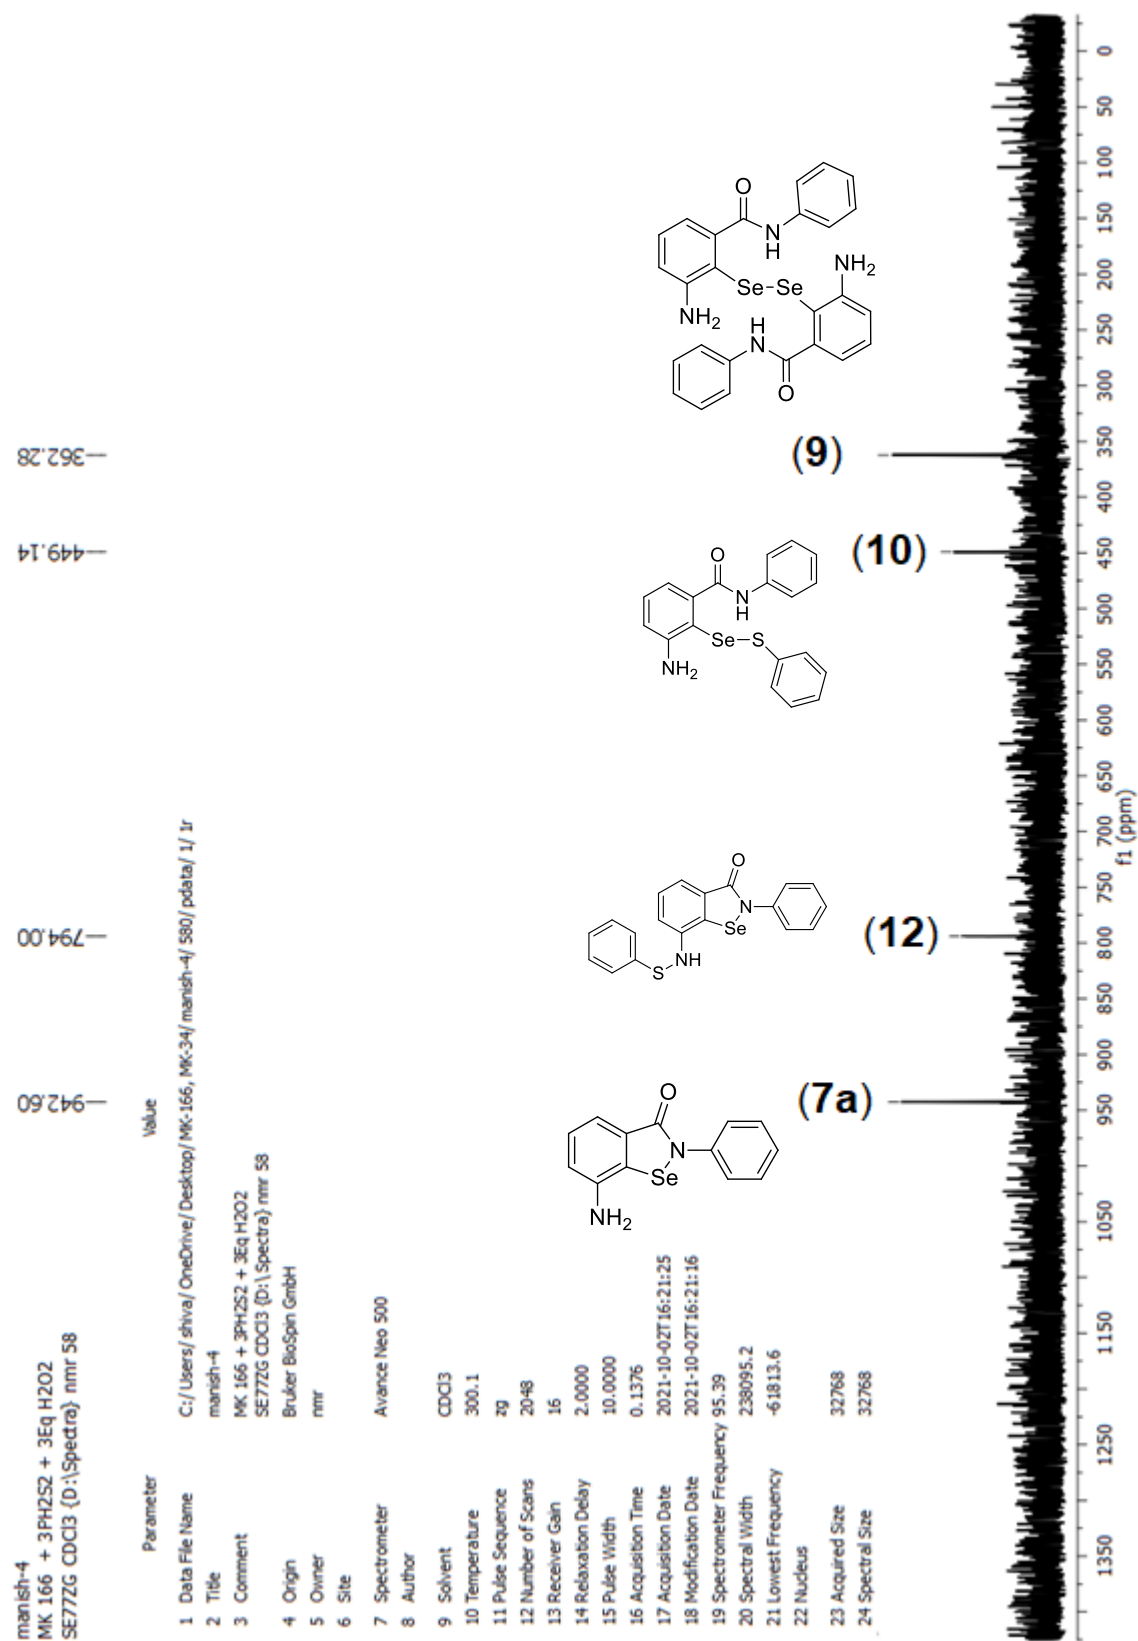

Figure S35. The  $^{77}\text{Se}\{^1\text{H}\}$  NMR spectrum of diselenide **15** +  $\text{H}_2\text{O}_2$  + PhSH

The reaction followed by  $^{77}\text{Se}$  NMR.  
All three peaks separated.

(50ppm) 2d ↑ 2ef ↑

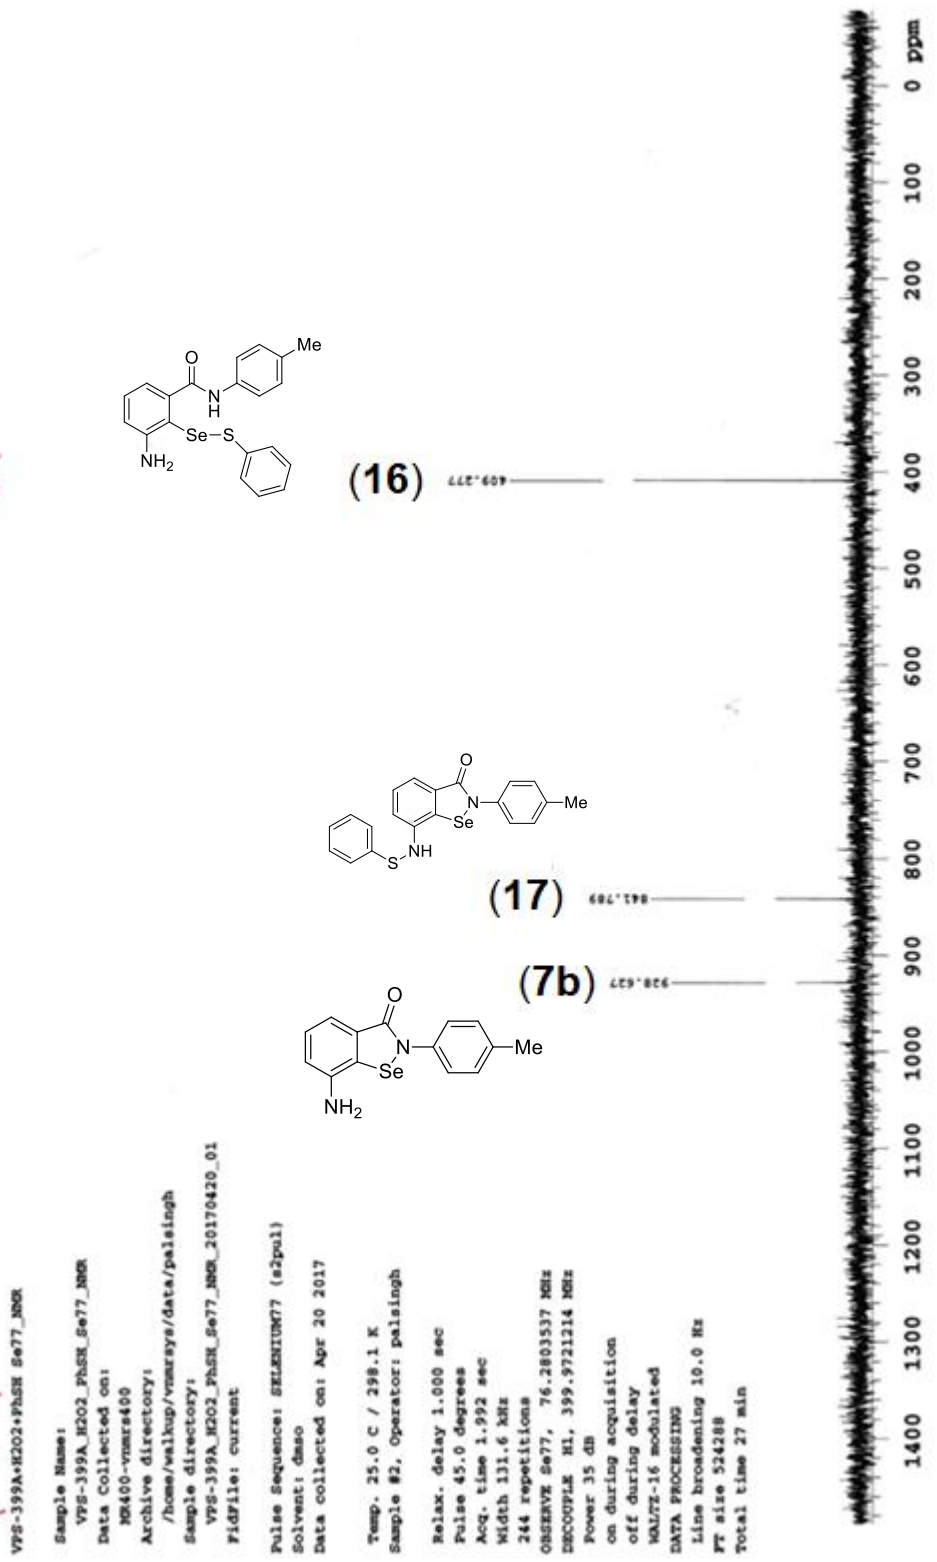

VPS-399A\_H2O2\_PhSH\_Se77\_NMR

Sample Name:  
VPS-399A\_H2O2\_PhSH\_Se77\_NMR

Data Collected on:  
M0400-vnmrs400

Archive directory:  
/home/walshp/vnmrsys/data/palsingh

Sample directory:  
VPS-399A\_H2O2\_PhSH\_Se77\_NMR\_20170420\_01

FidFile: current

Pulse Sequence: SELHMUN77 (s2pul1)

Solvent: dmsc

Data collected on: Apr 20 2017

Temp. 25.0 C / 298.1 K

Sample #2, Operator: palsingh

Relax. delay 1.000 sec

Pulse 45.0 degrees

Acq. time 1.992 sec

Width 131.6 kHz

244 repetitions

OBSERVE Se77, 76.2803537 MHz

DECOUPLE H1, 399.9721214 MHz

Power 35 dB

on during acquisition

off during delay

WALTZ-16 modulated

DATA PROCESSING

Line broadening 10.0 Hz

FT size 524288

Total time 27 min

Figure S36. The  $^1\text{H}$  NMR spectrum of **10** in  $\text{CDCl}_3$

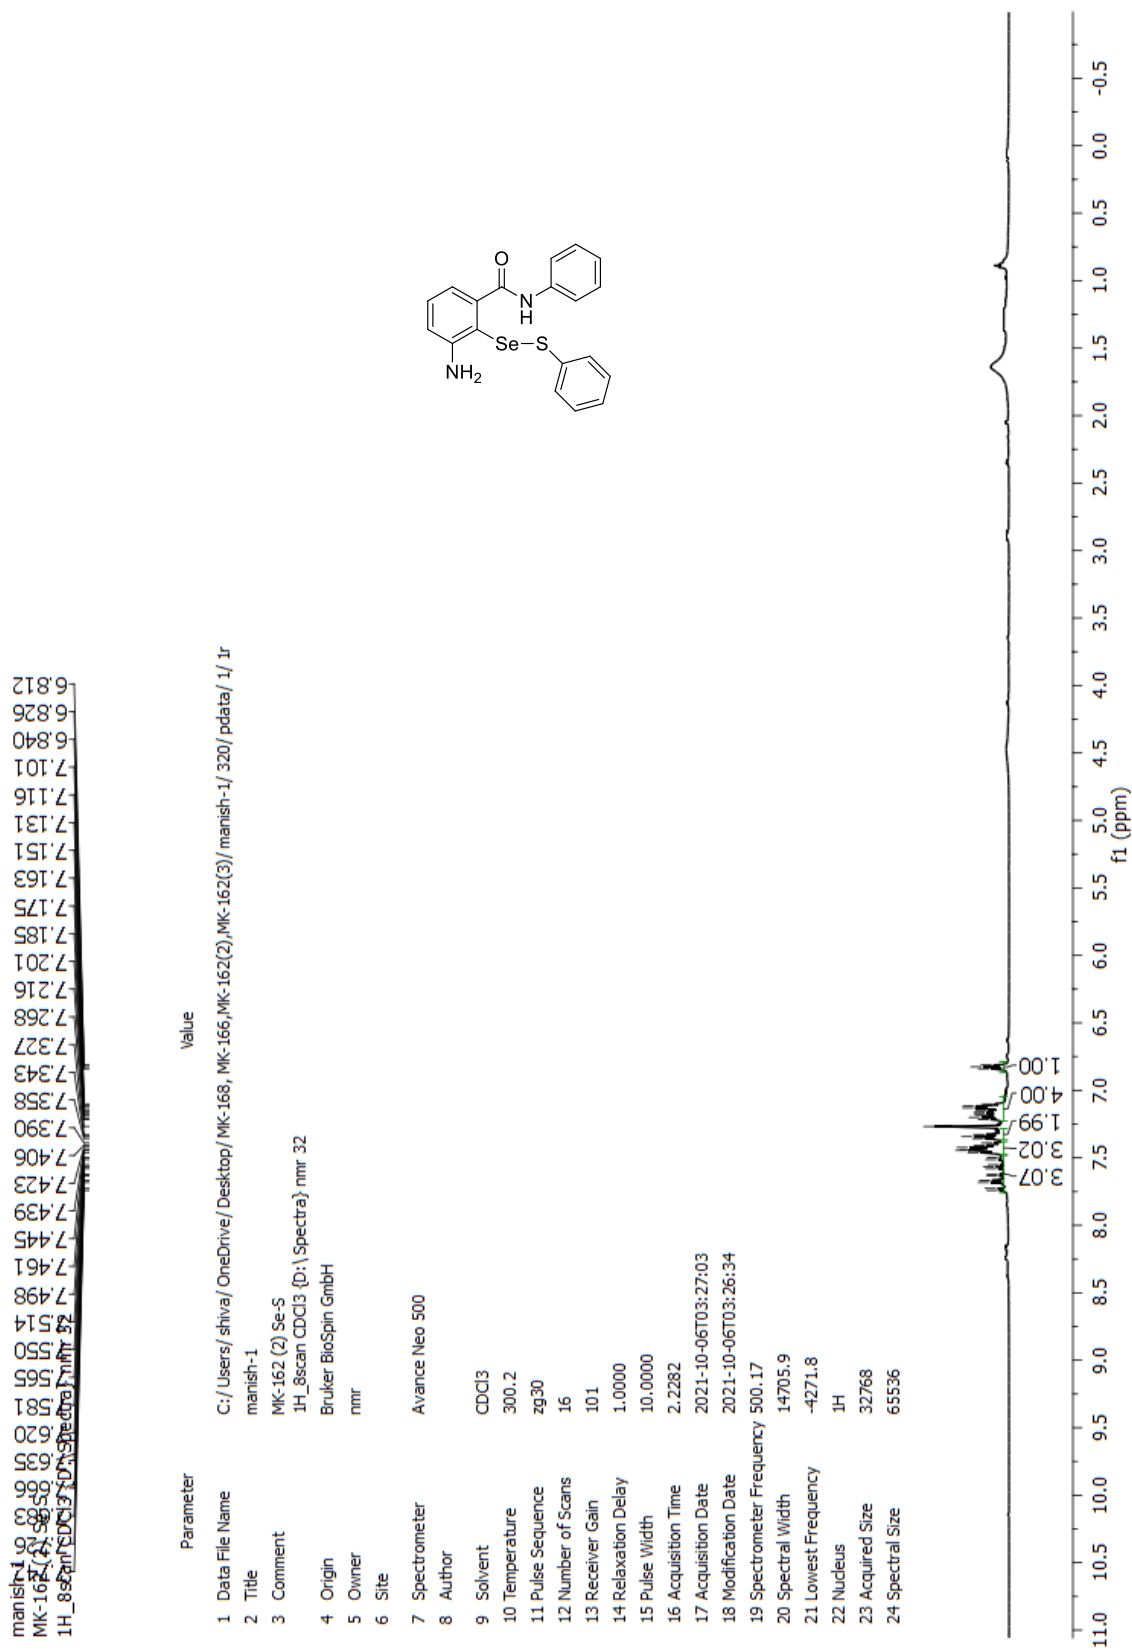

Figure S37. The  $^1\text{H}$  NMR Expansion spectrum of **10** in  $\text{CDCl}_3$

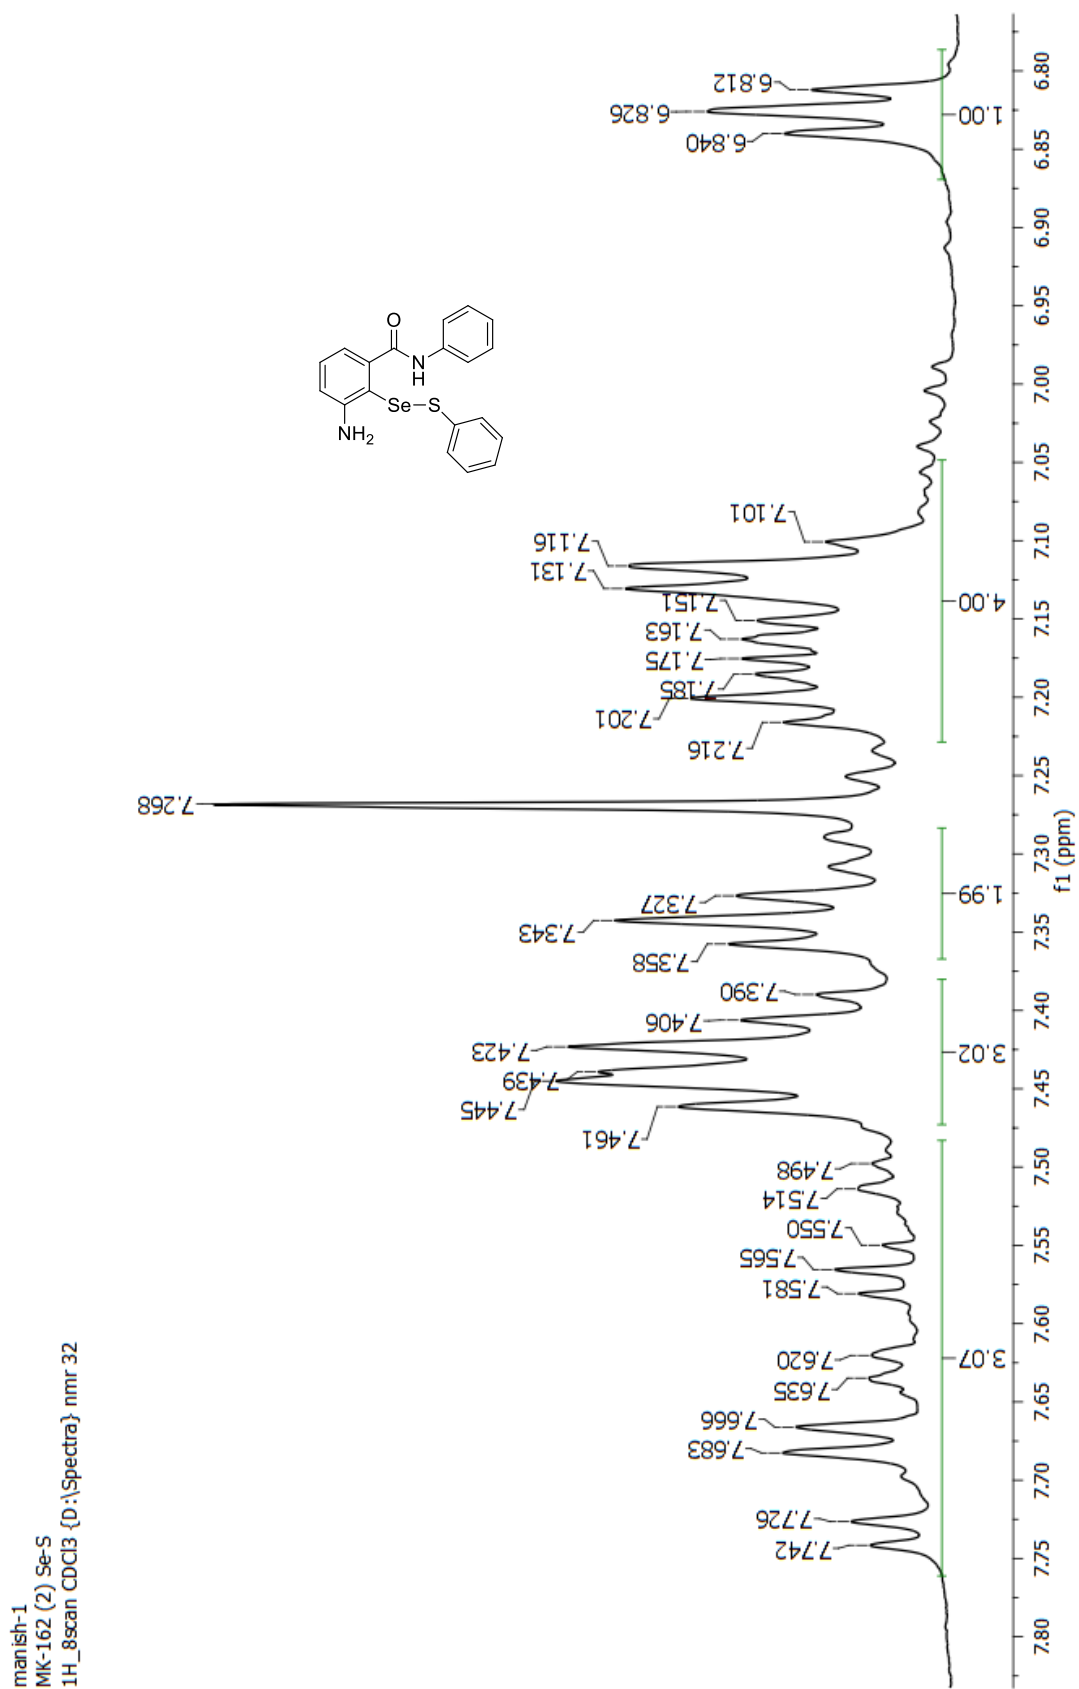

Figure S38. The  $^{13}\text{C}$  NMR spectrum of **10** in  $\text{CDCl}_3$

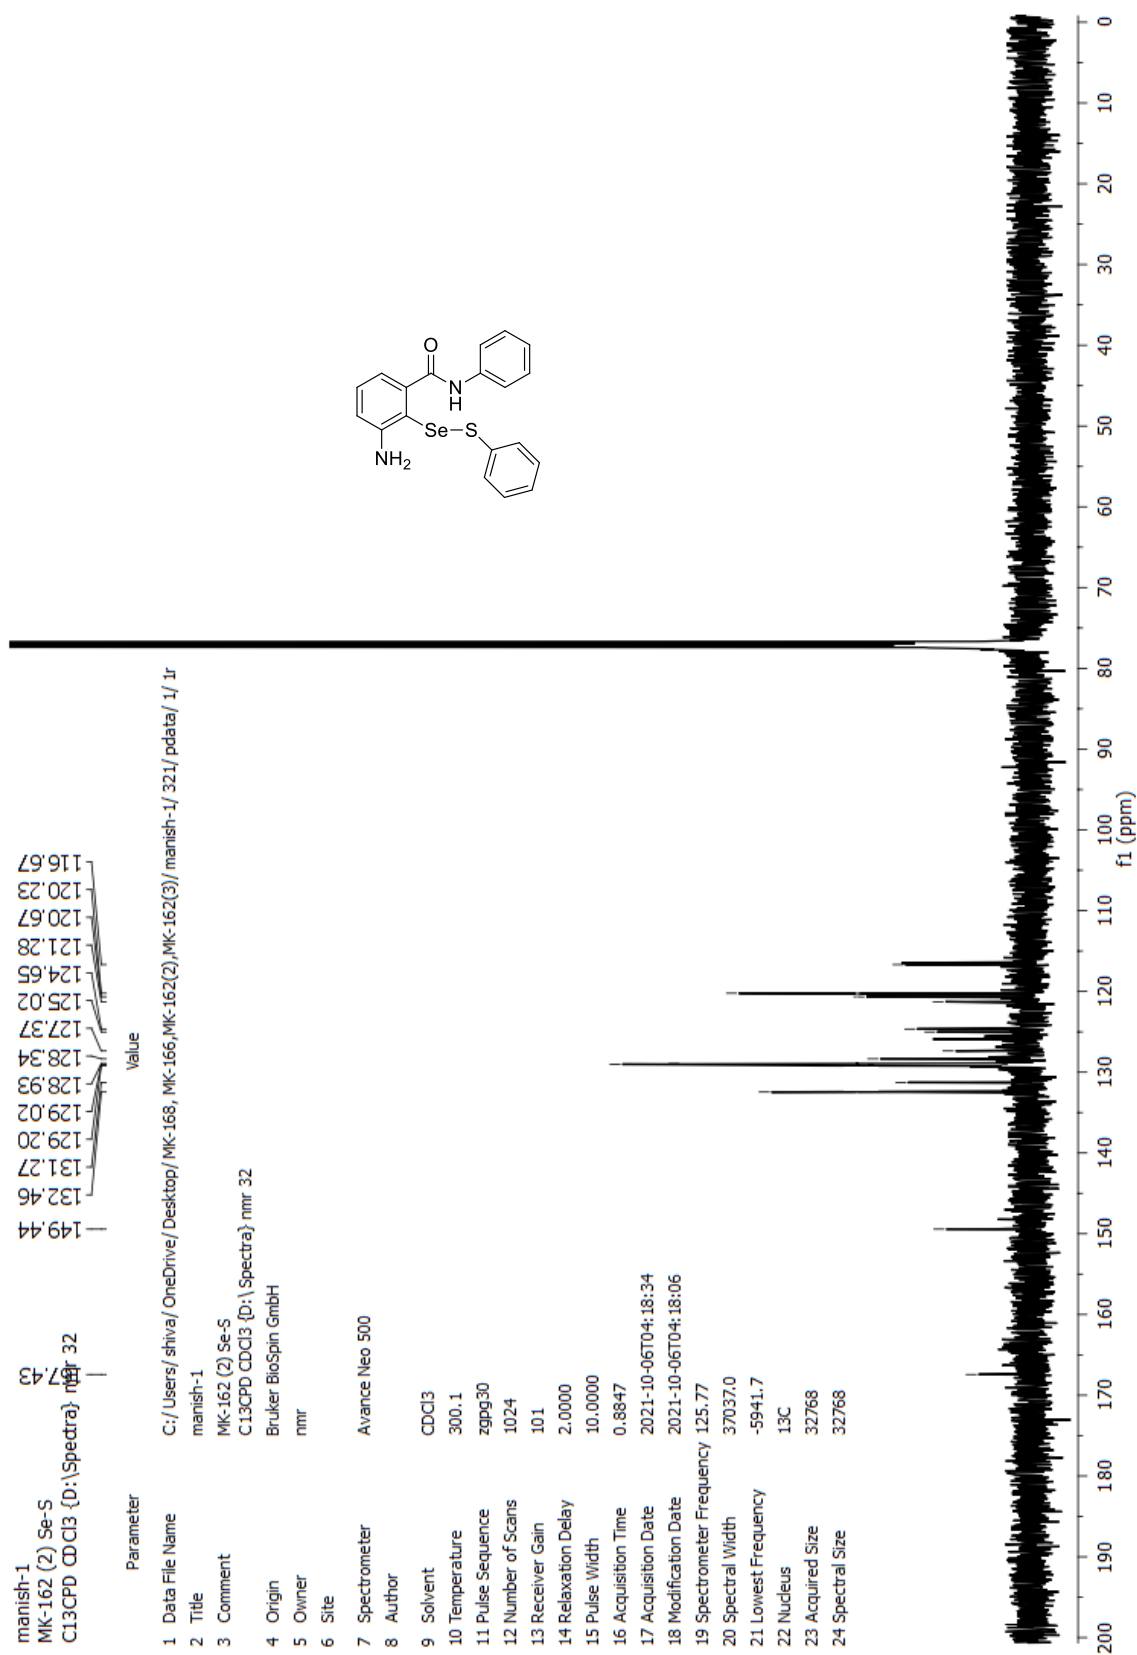

Figure S39. The  $^{13}\text{C}$  NMR expansion spectrum of **10** in  $\text{CDCl}_3$

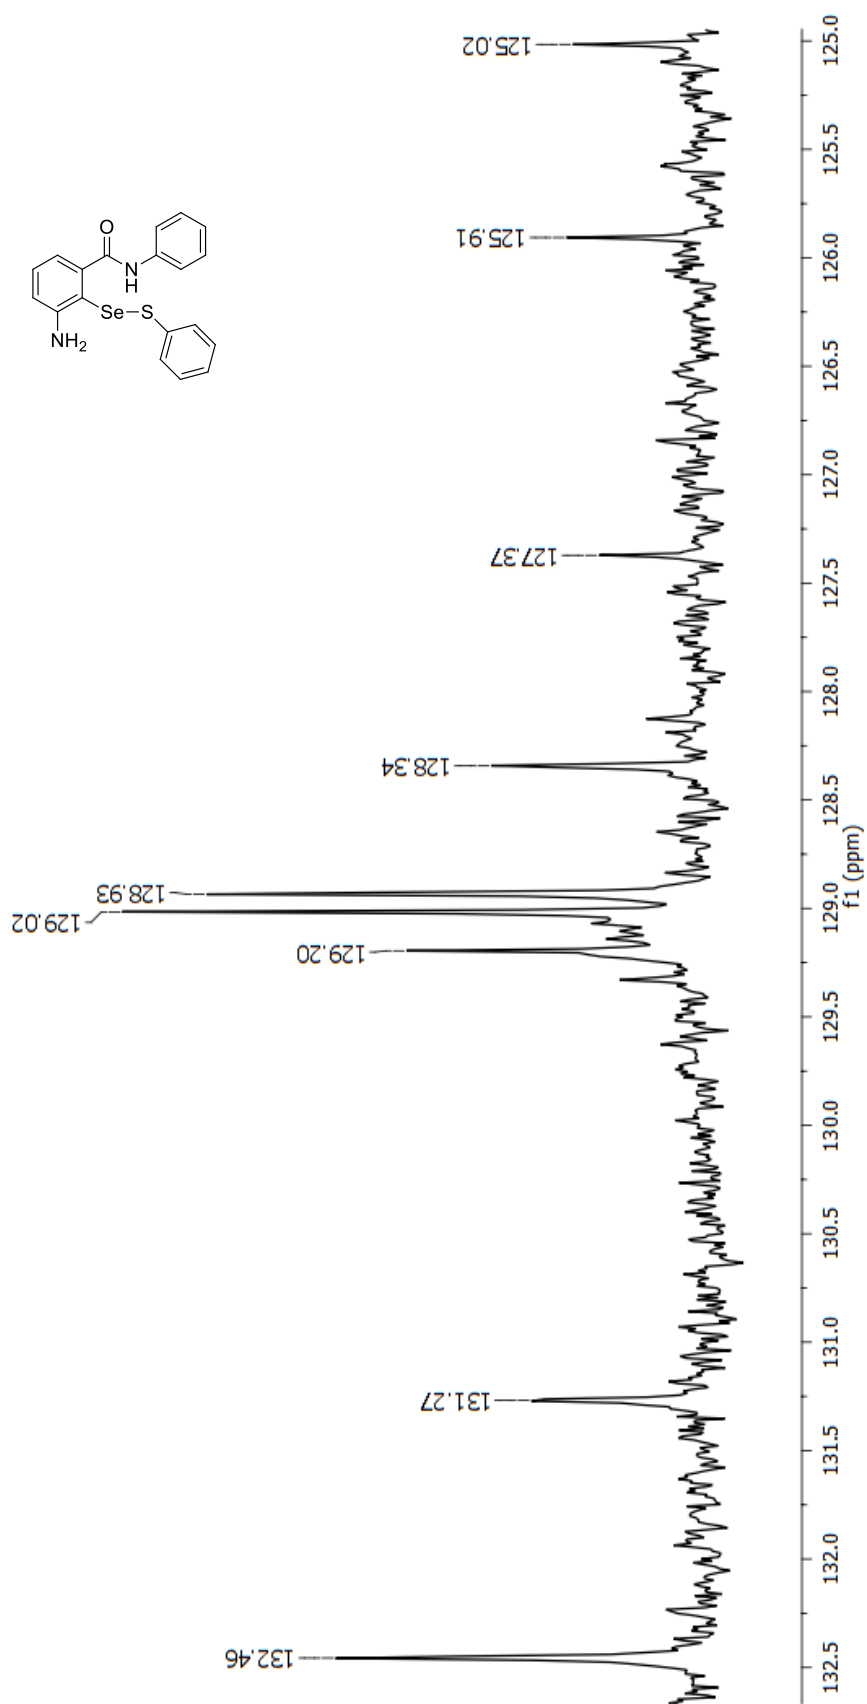



Figure S40. The  $^{77}\text{Se}\{^1\text{H}\}$  NMR spectrum of **10** in  $\text{CDCl}_3$

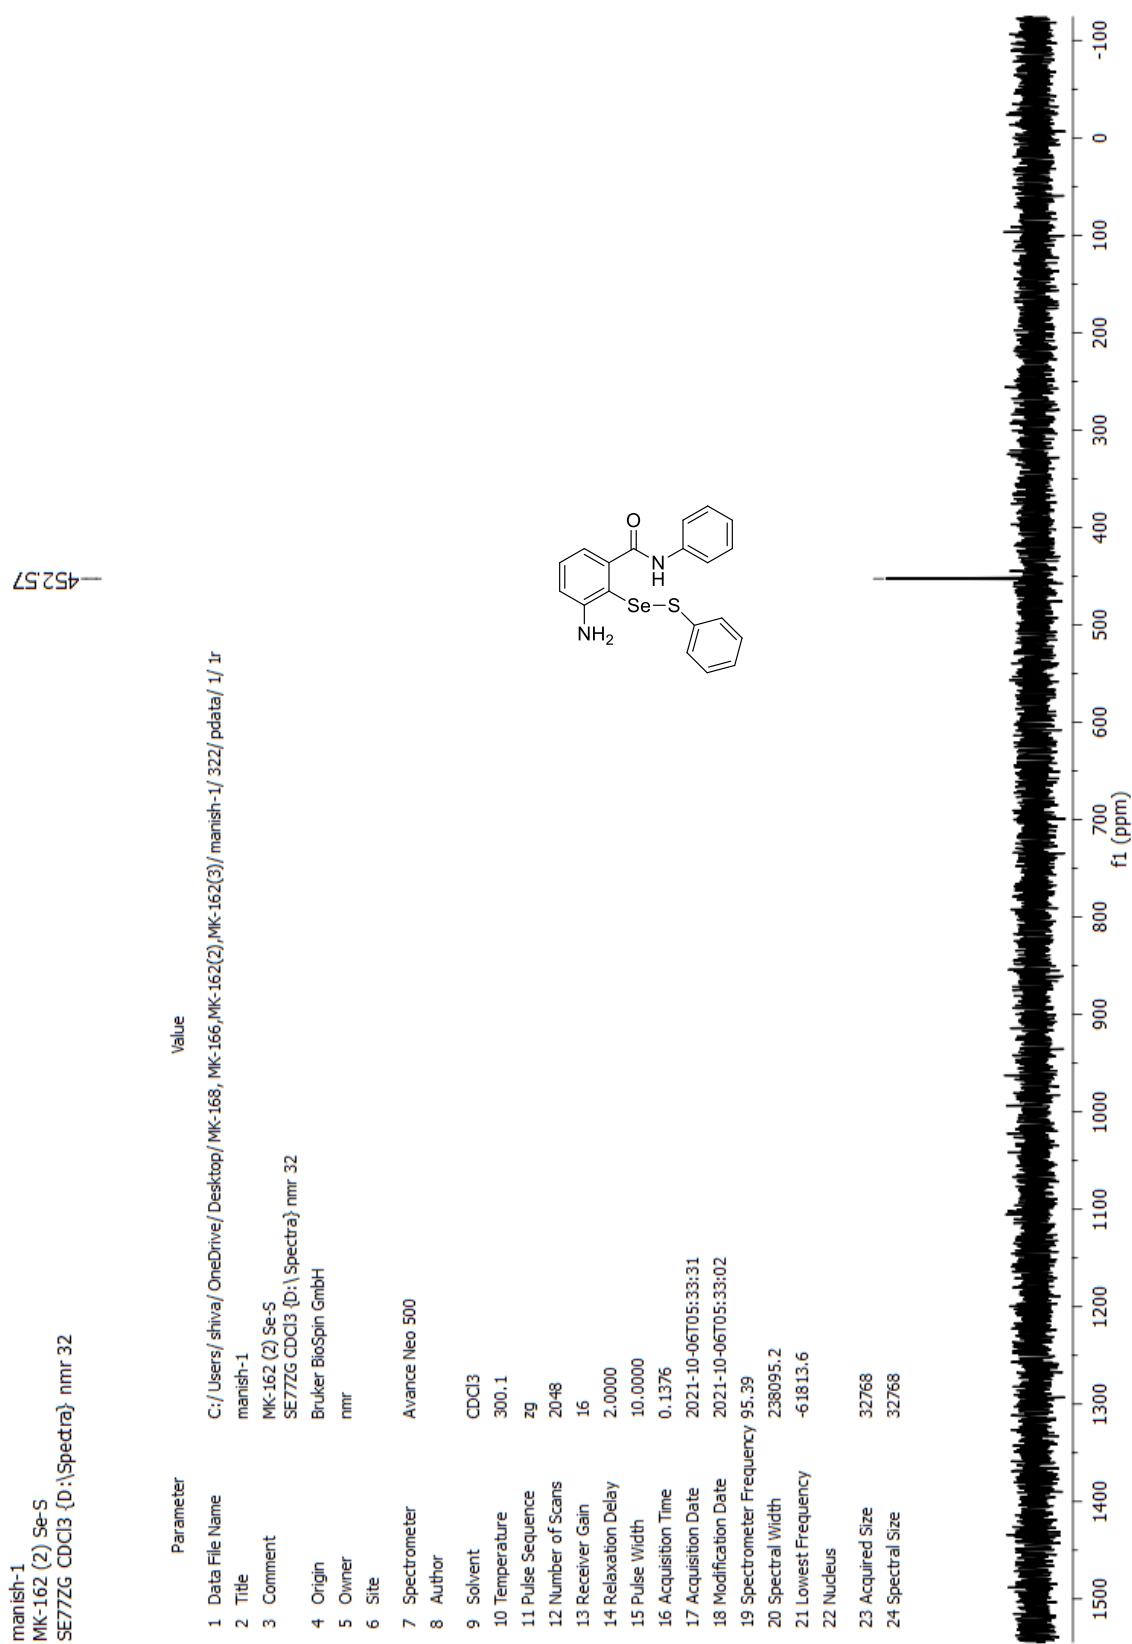

Figure S41. The  $^{77}\text{Se}\{^1\text{H}\}$  NMR spectrum of **10** in DMSO- $d_6$

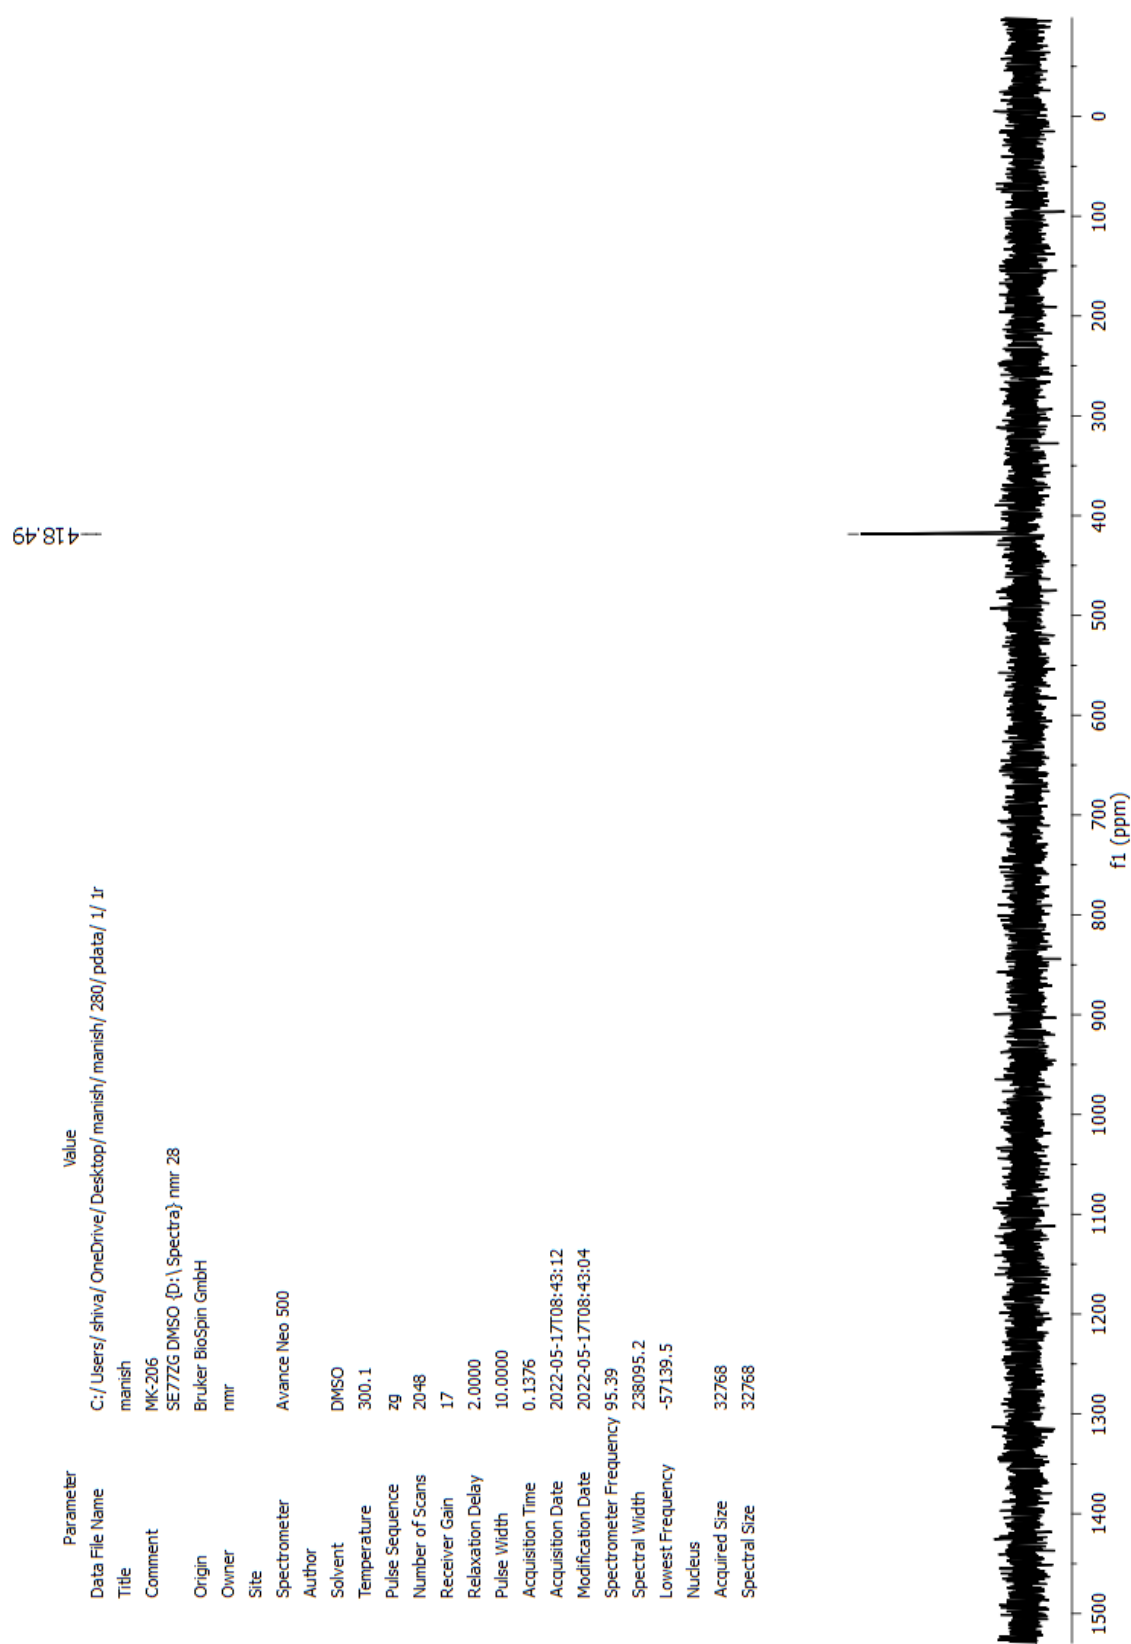

Figure S42. The HRMS of **10**

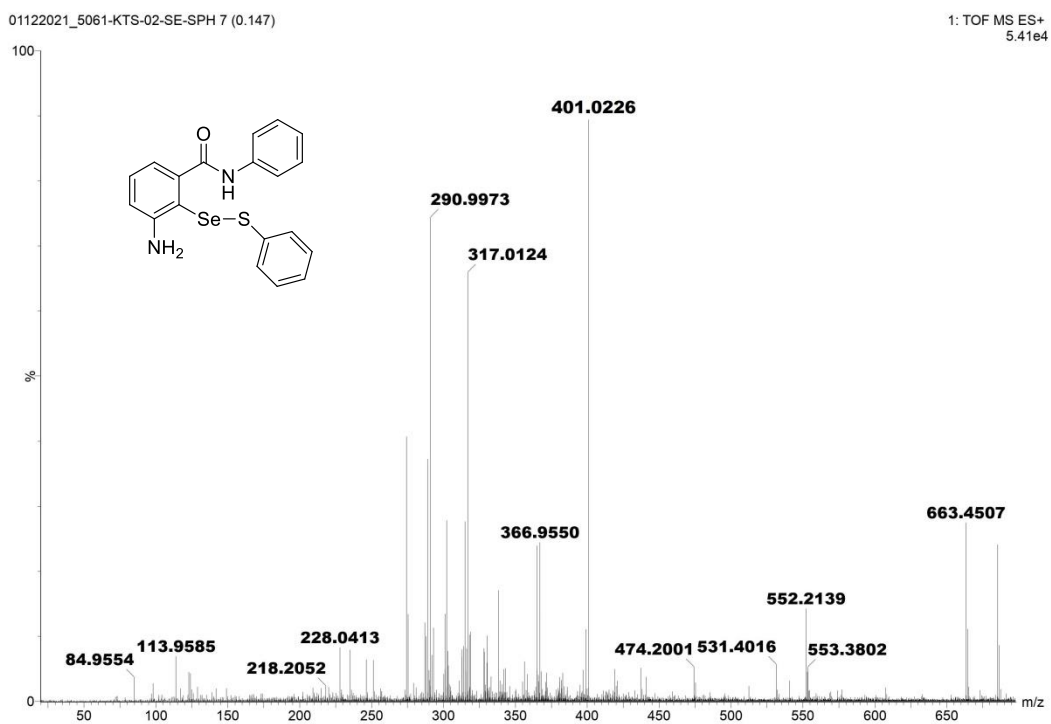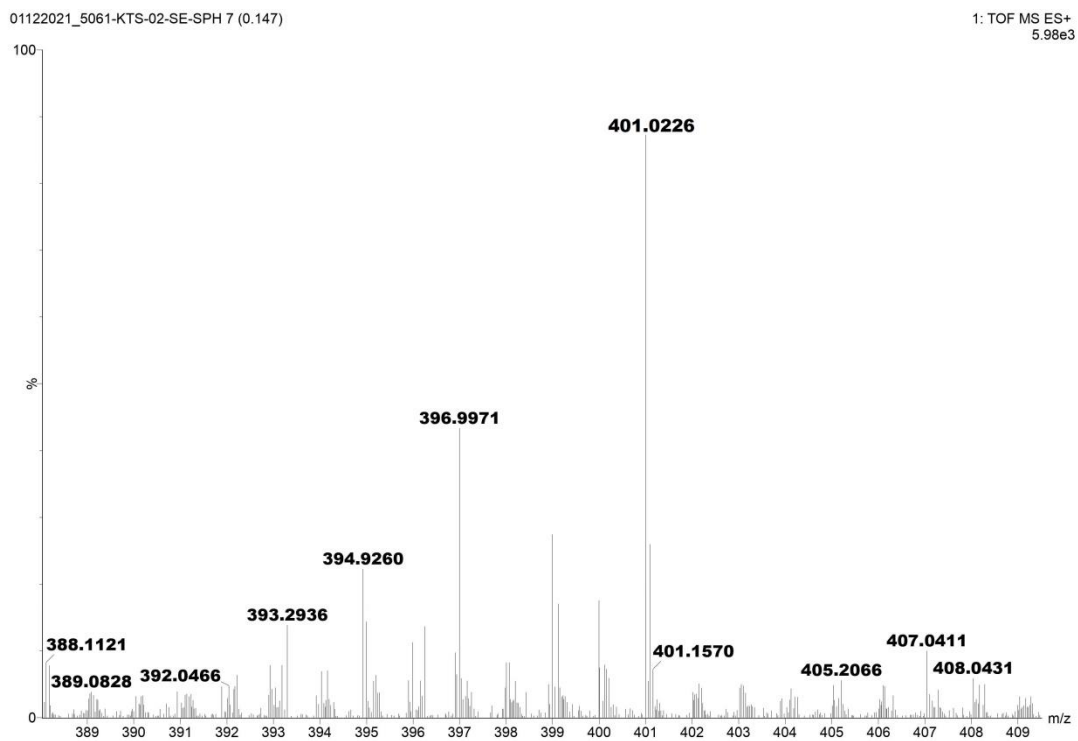



Figure S44. The  $^{13}\text{C}$  NMR spectrum of **12**

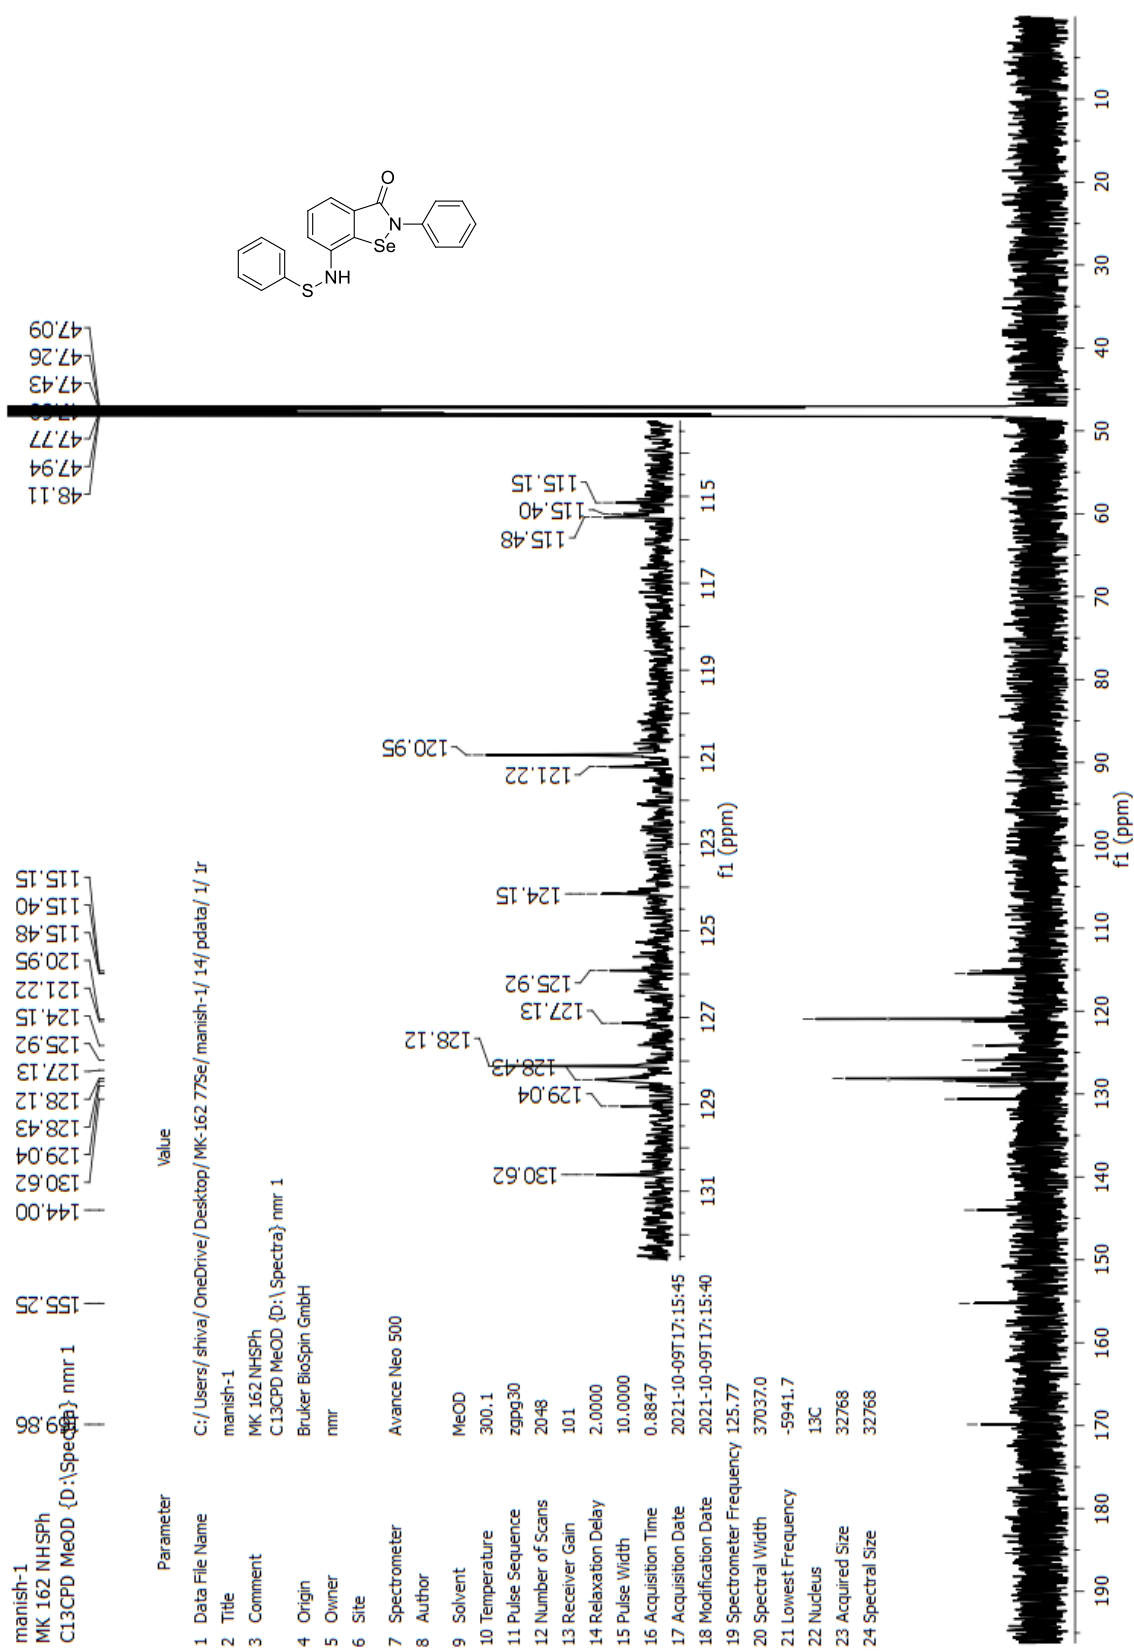

Figure S45. The  $^{77}\text{Se}\{^1\text{H}\}$  NMR spectrum of **12**

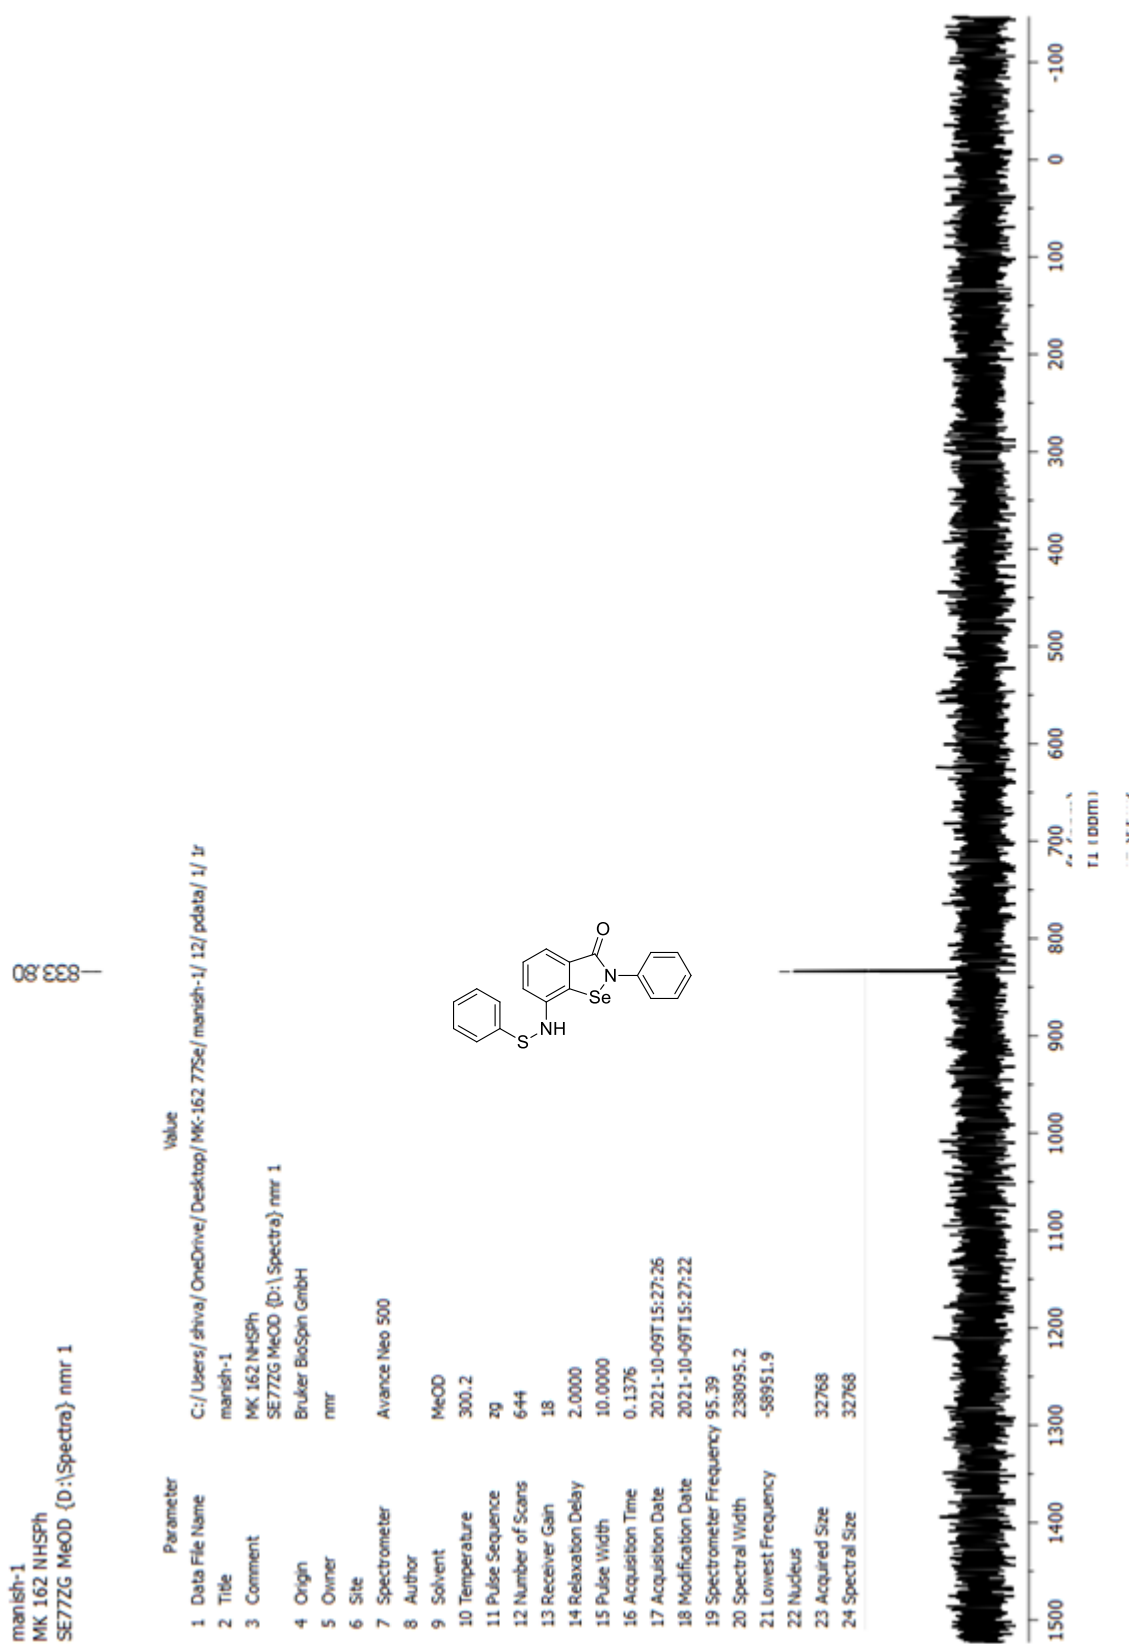

Figure S46. The HRMS of **12**

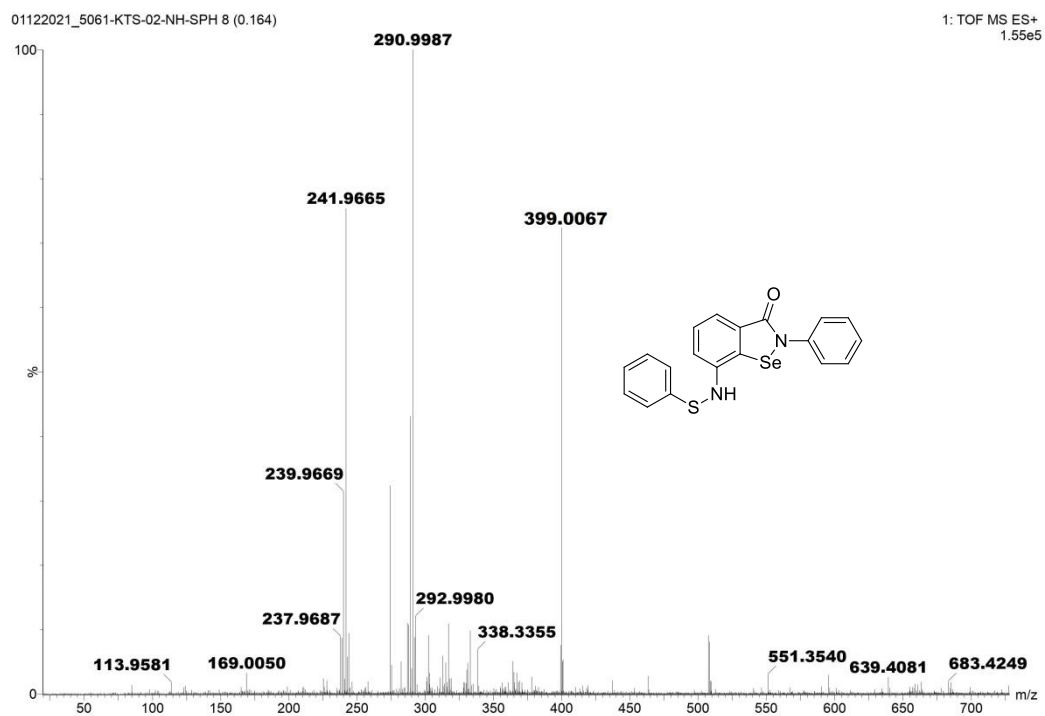

Figure S47. The  $^1\text{H}$  NMR spectrum of **16** in  $\text{CDCl}_3$

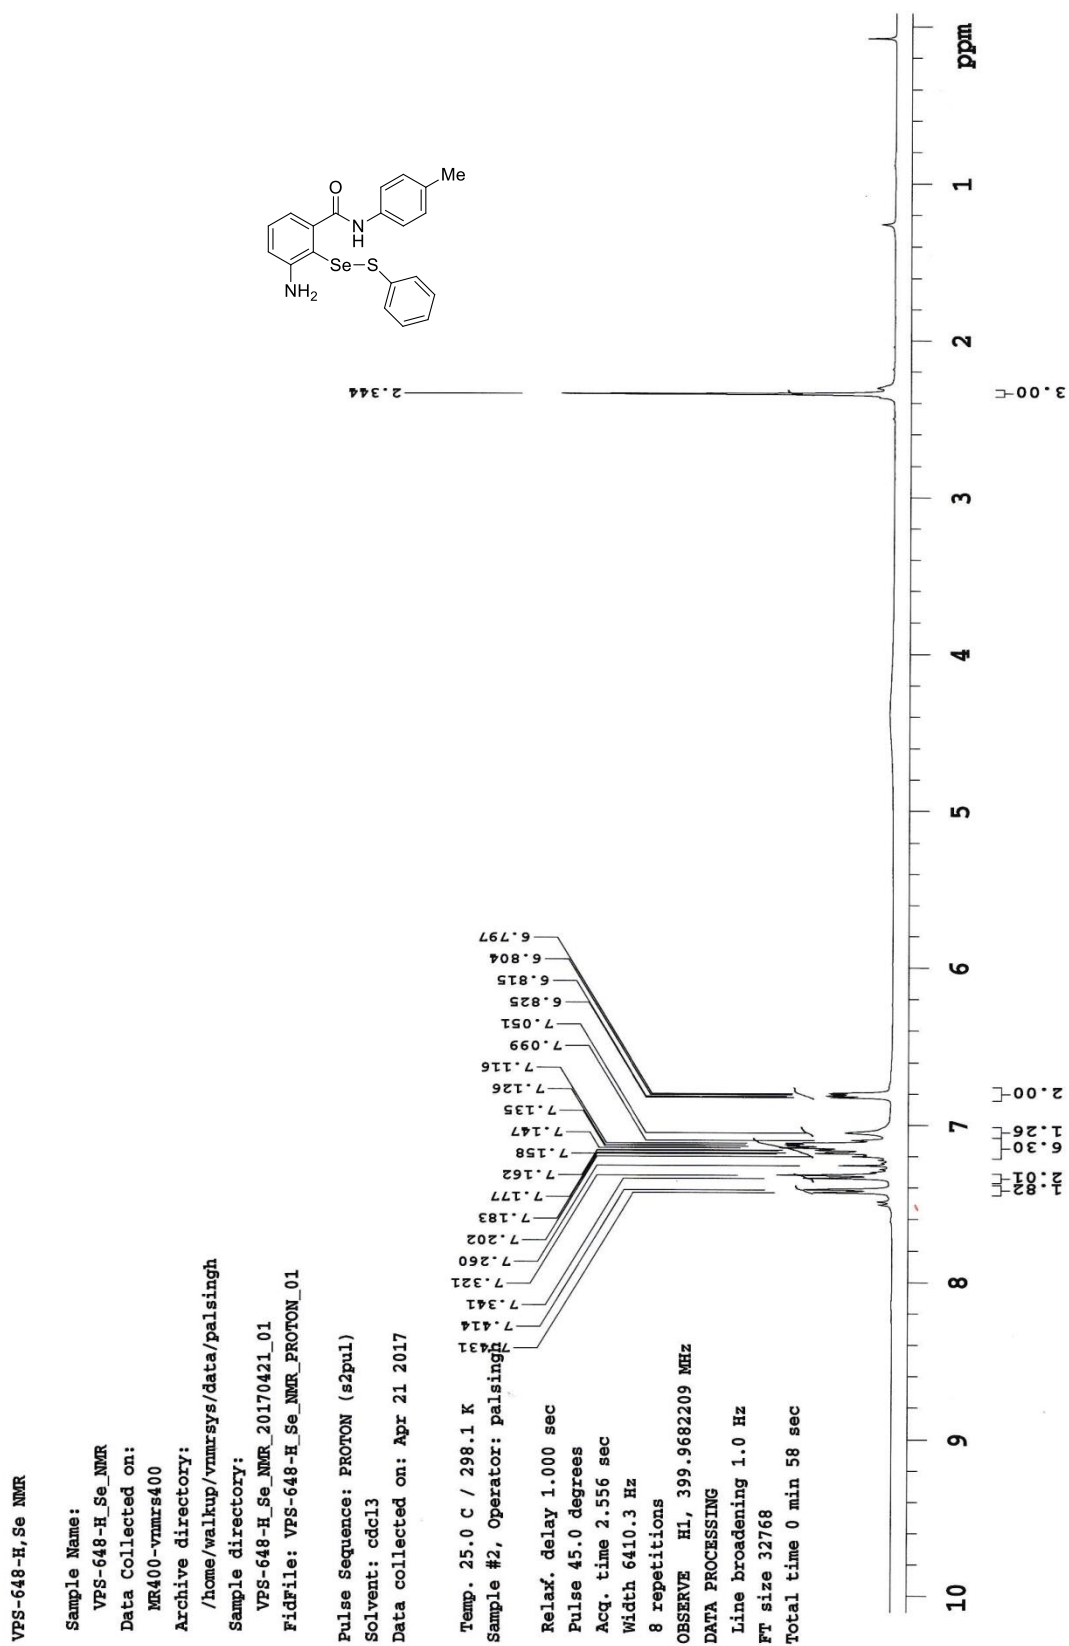



Figure S48. The Expanded version of the  $^1\text{H}$  NMR spectrum of **16** in  $\text{CDCl}_3$

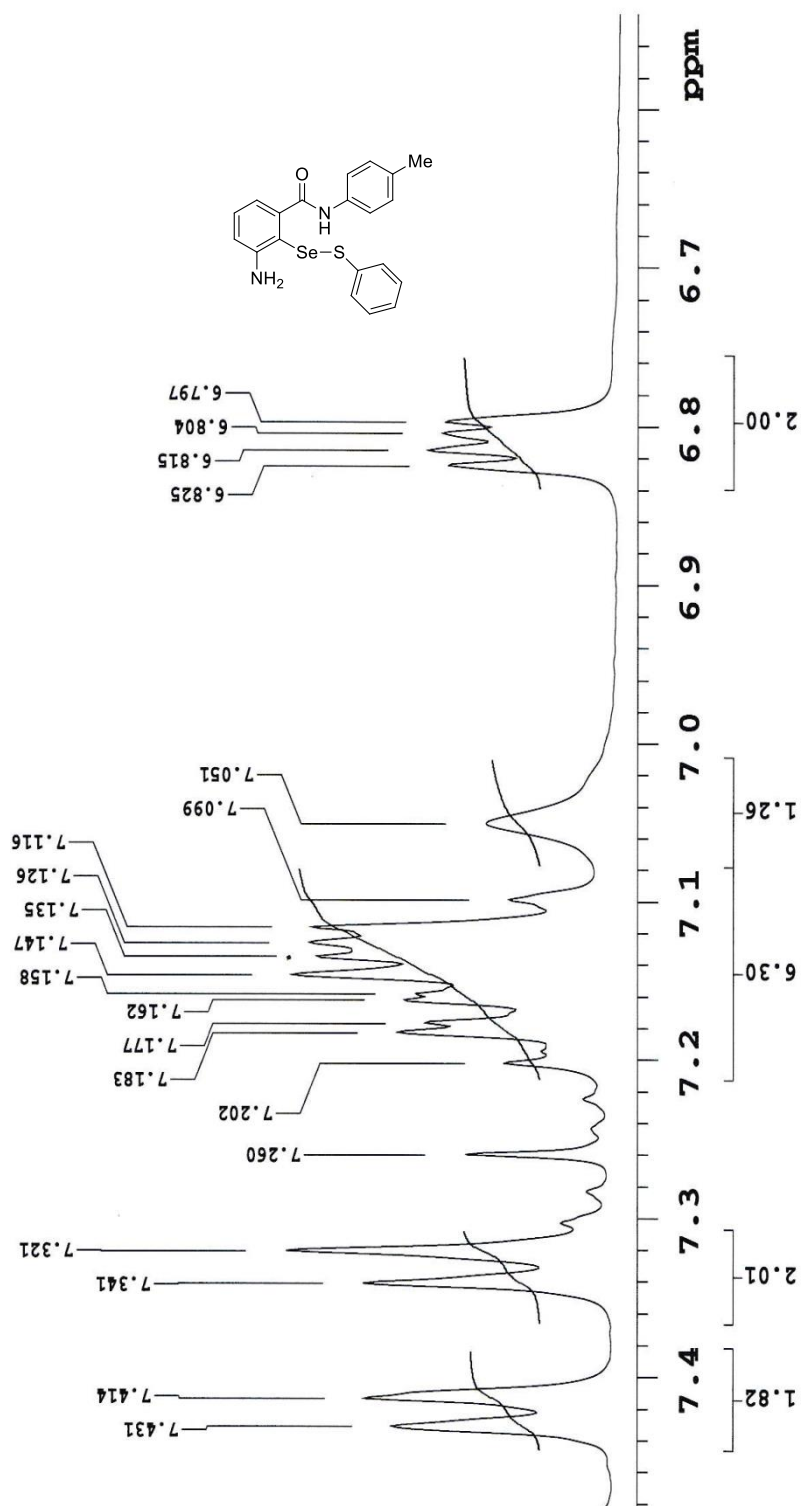

Figure S49. The  $^{13}\text{C}$  NMR spectrum of **16** in  $\text{CDCl}_3$

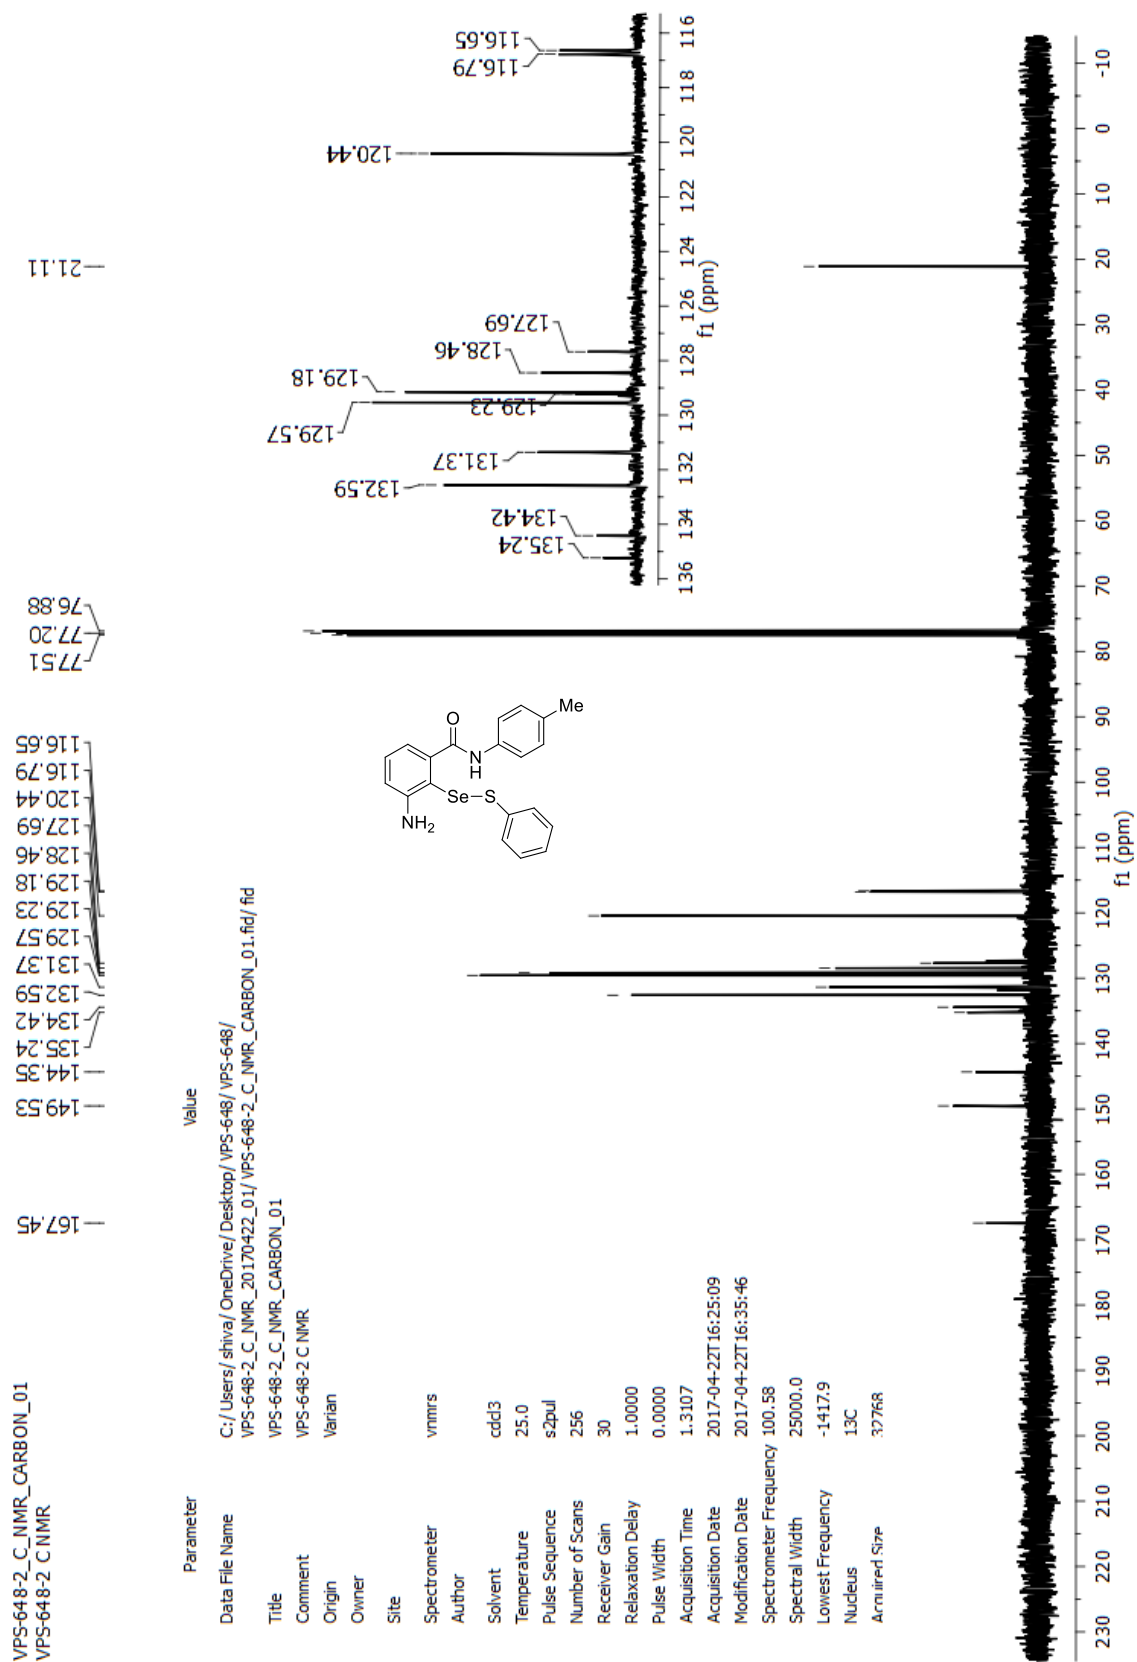

Figure S50. The  $^{77}\text{Se}\{^1\text{H}\}$  NMR spectrum of **16** in  $\text{CDCl}_3$

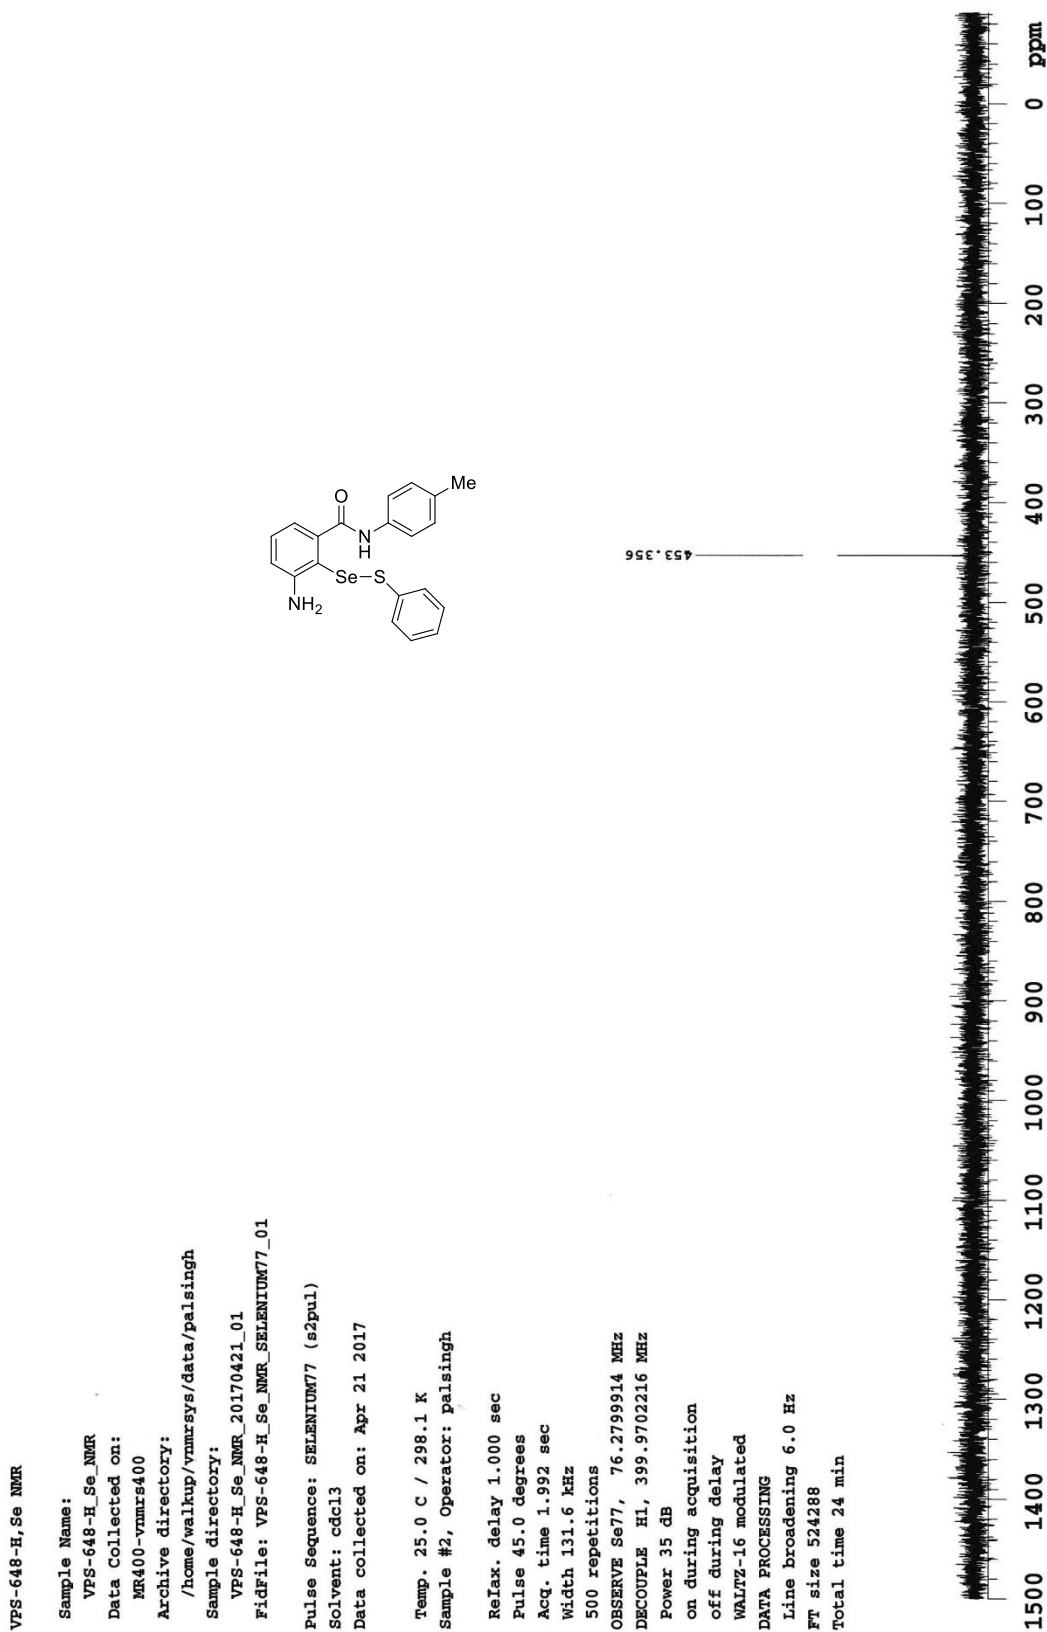

Figure S51. The HRMS of **16**

Analysis Name pg-le-vps-648-210\_A19.1 User bdal  
 Comment 1 Instrument FLEX-PC  
 Method D:\Methods\FlexControlMethods\Paul Gates\RP\_100-1500\_Da-pjg.par MALDI MASS SPECTRUM REPORT

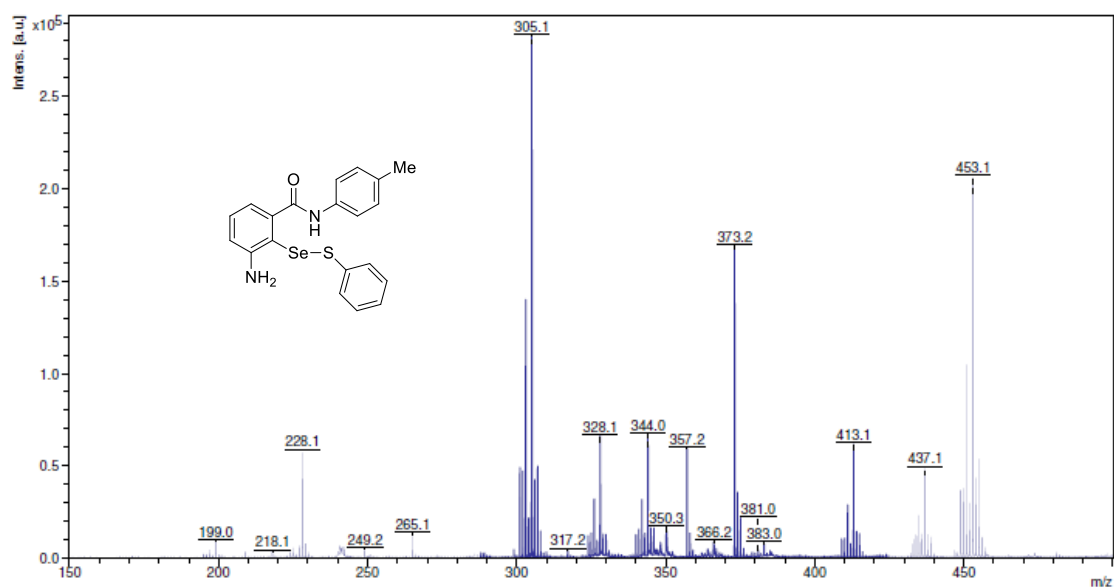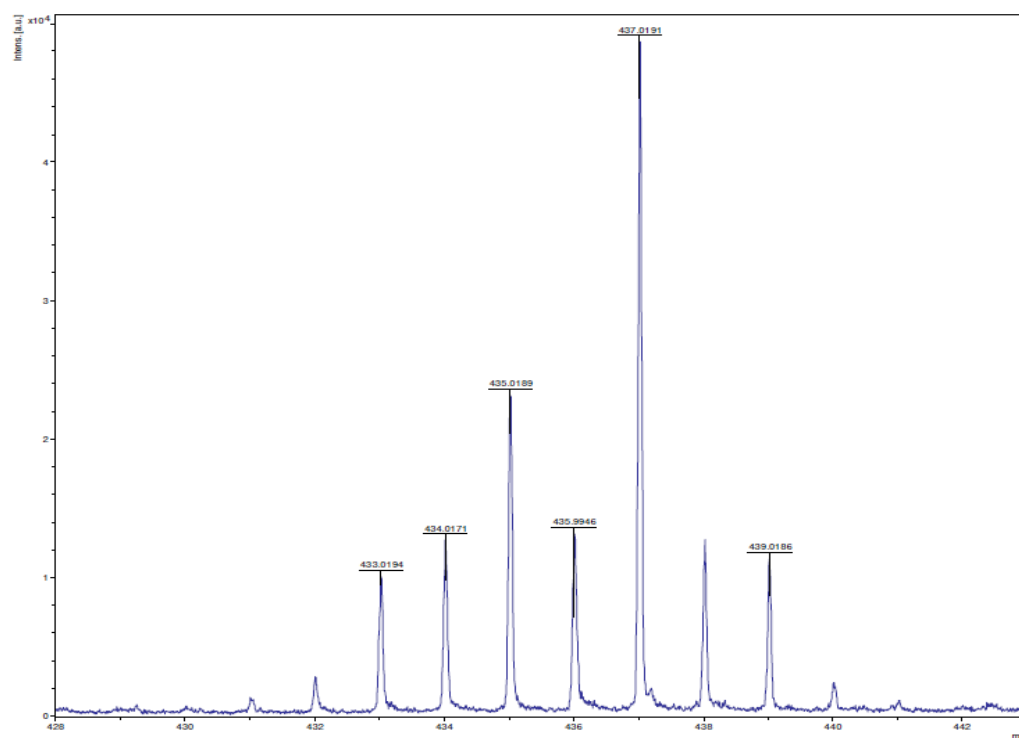

| Formula                                             | Calc m/z | Measured m/z | err [ppm] | ID                  |
|-----------------------------------------------------|----------|--------------|-----------|---------------------|
| C <sub>20</sub> H <sub>18</sub> N <sub>2</sub> OSeS | 437.0198 | 437.0191     | 1.60      | [M+Na] <sup>+</sup> |

Figure S52. The  $^1\text{H}$  NMR spectrum of **17** in  $\text{CDCl}_3$

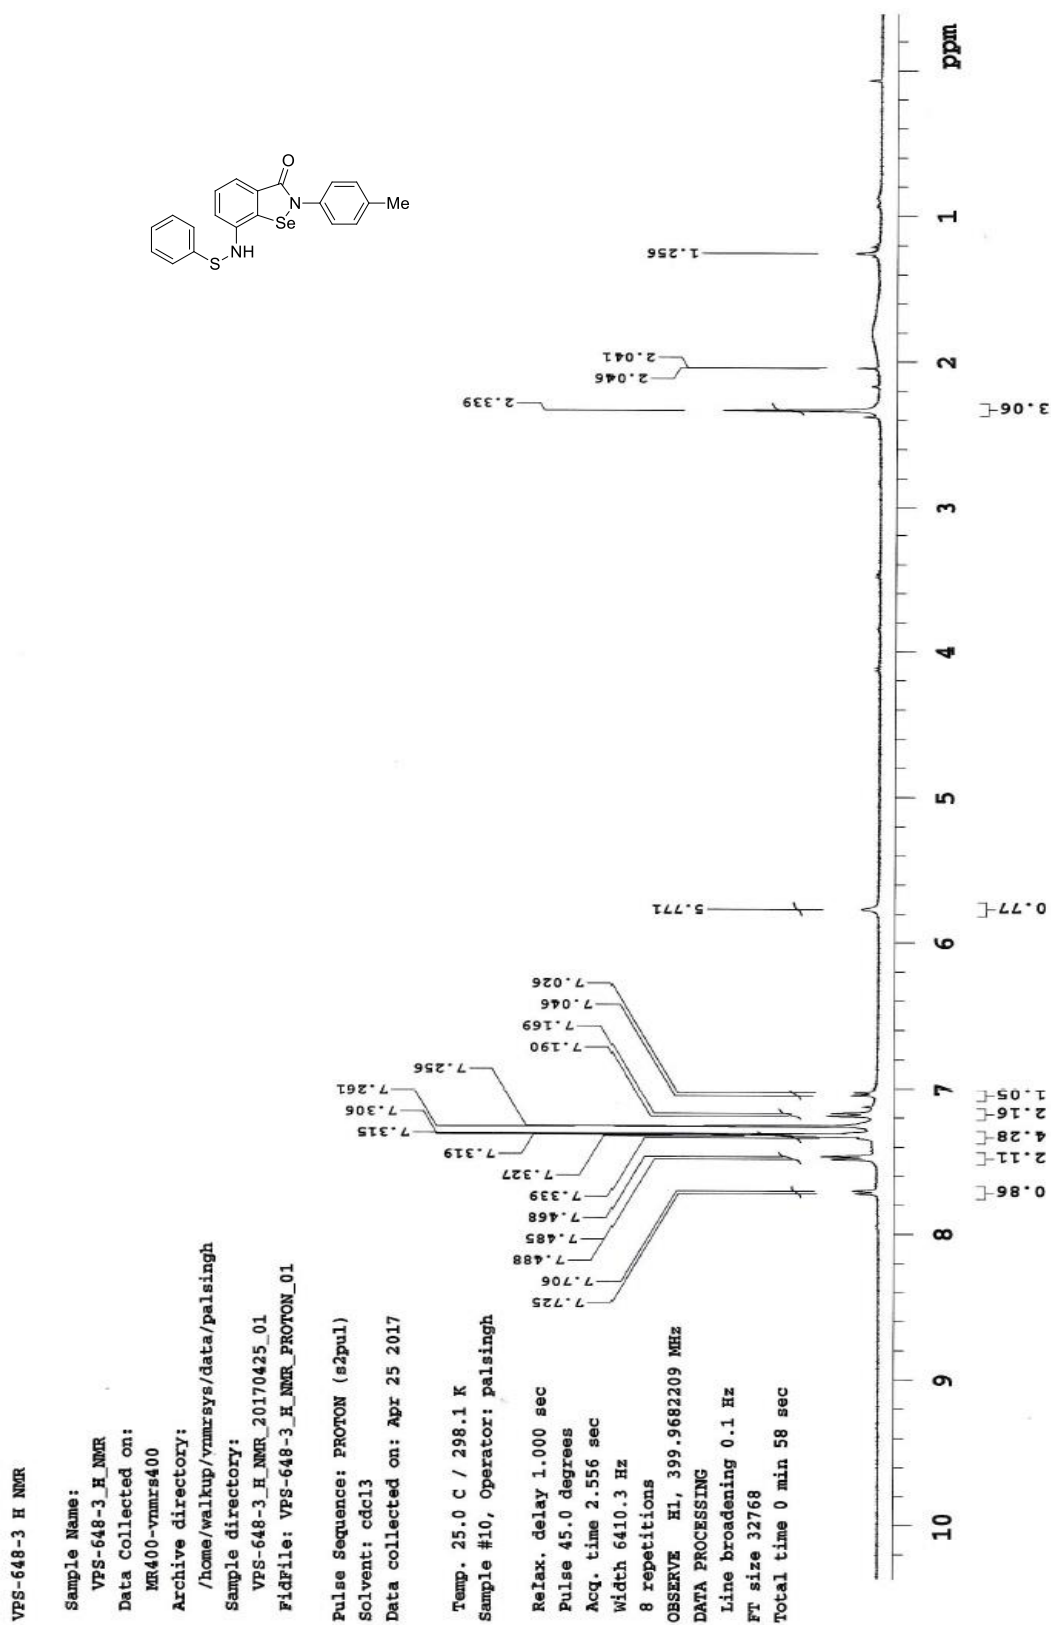

Figure S53. The Expanded version of the  $^1\text{H}$  NMR spectrum of **17** in  $\text{CDCl}_3$

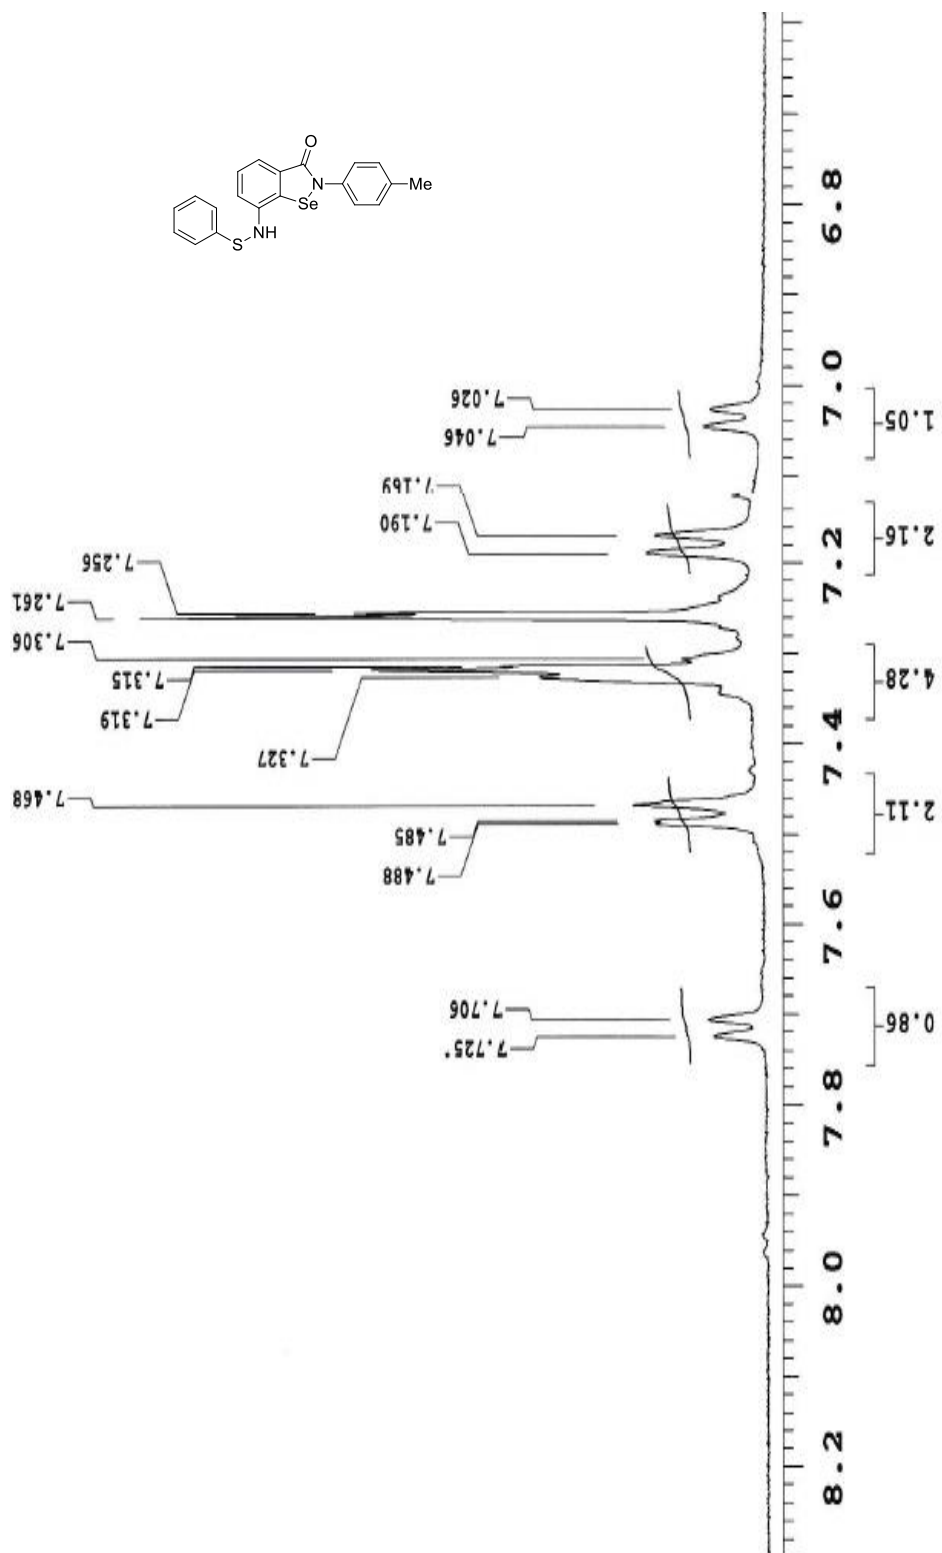

Figure S54. The  $^{13}\text{C}$  NMR spectrum of **17** in  $\text{CDCl}_3$

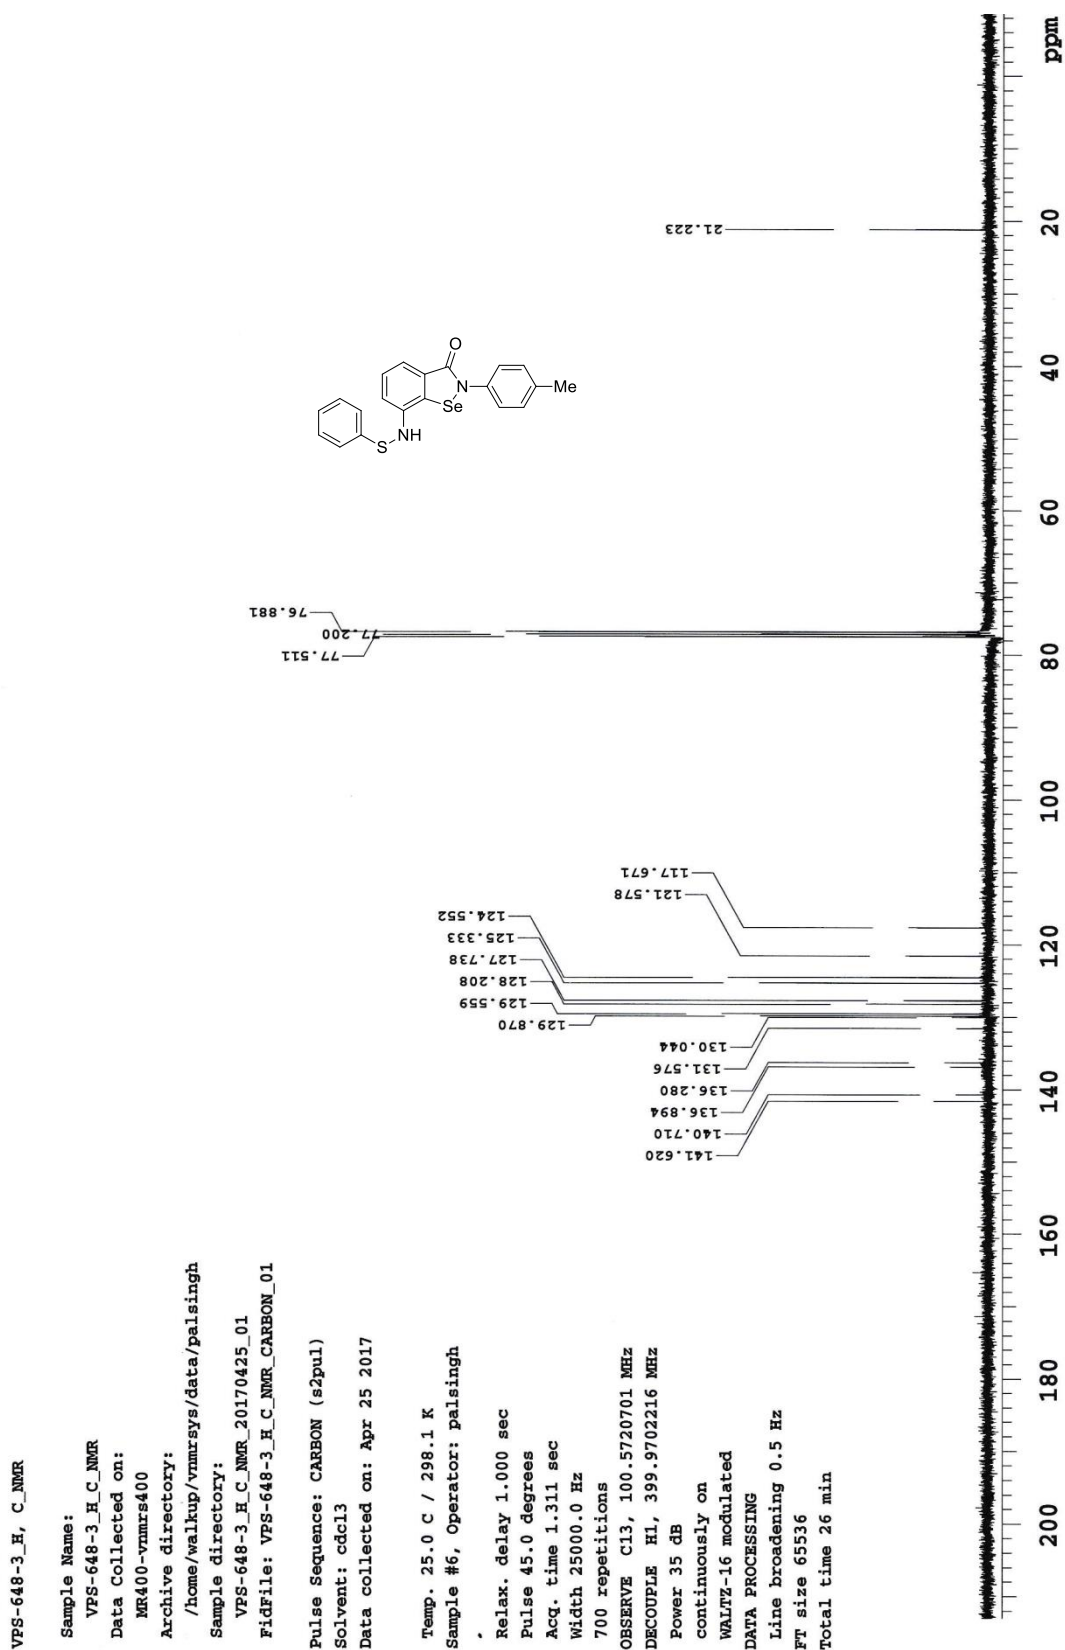

Figure S55. The  $^{77}\text{Se}\{^1\text{H}\}$  NMR spectrum of **17** in  $\text{CDCl}_3$

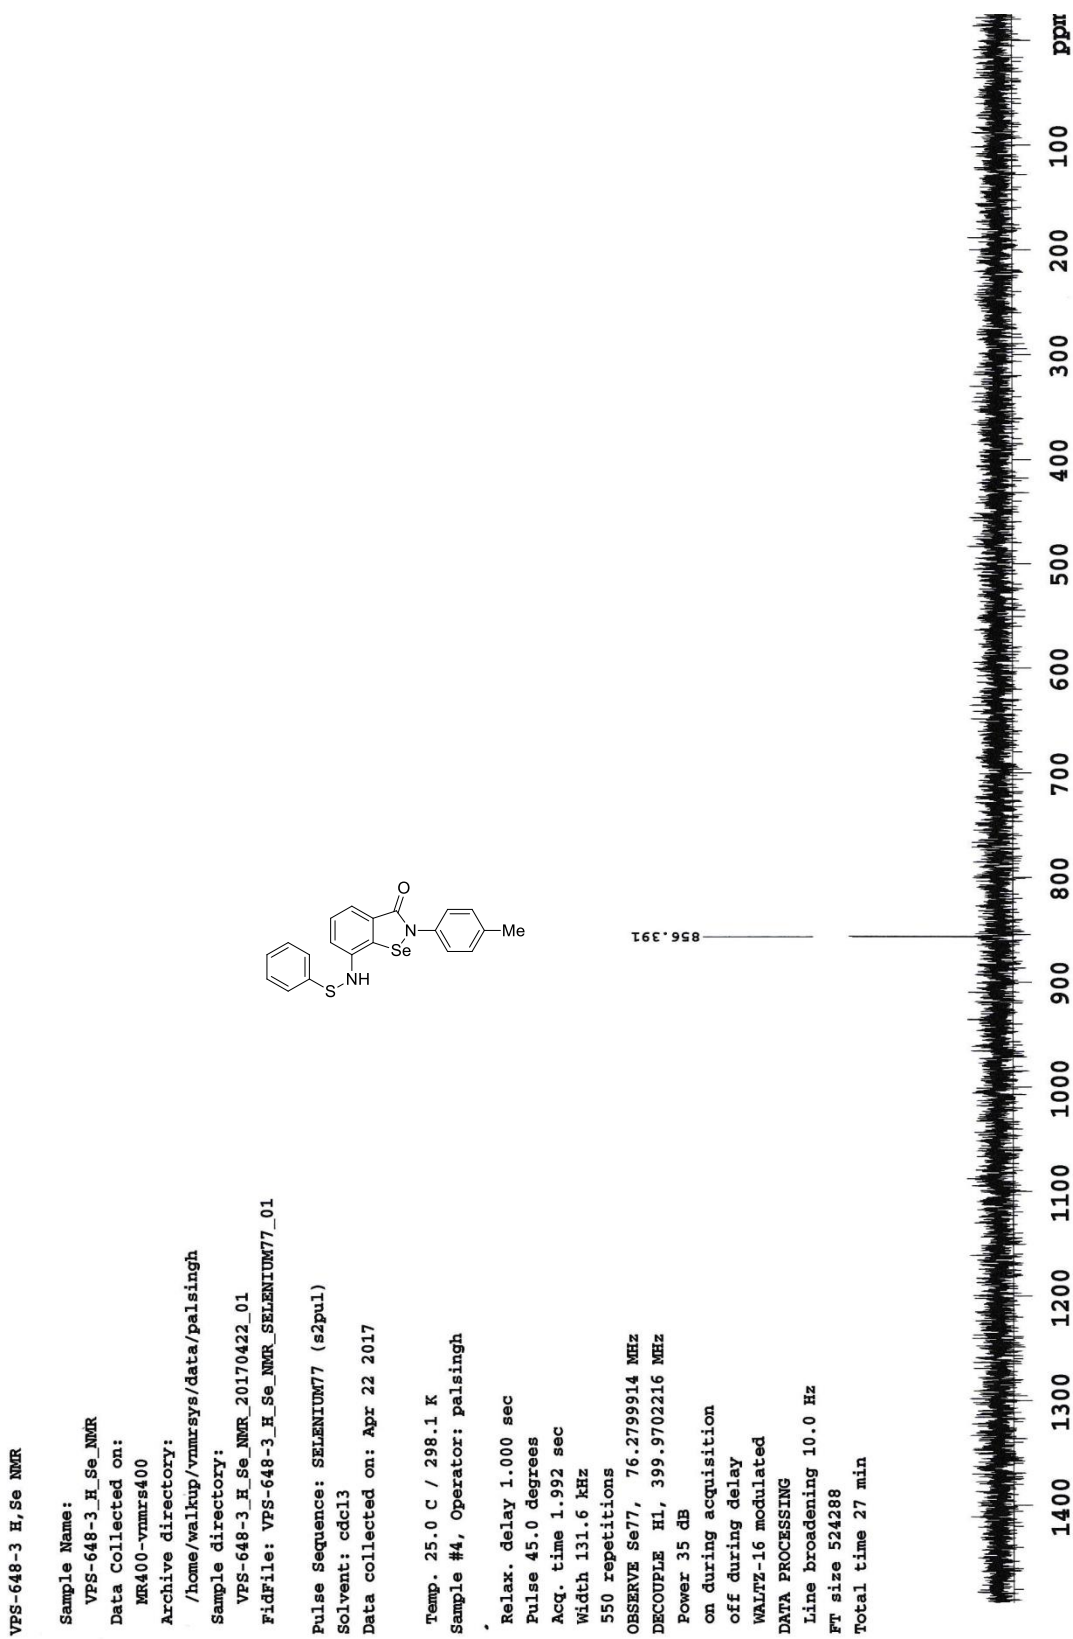



Figure S56. The HRMS of **17**

Analysis Name pg-le-vps-648-310\_A2011 User bdal  
 Comment 1 Instrument FLEX-PC  
 Method D:\Methods\flexControlMethods\PaulGates\RP\_100-1500\_Da-pjg.par MALDI MASS SPECTRUM REPORT

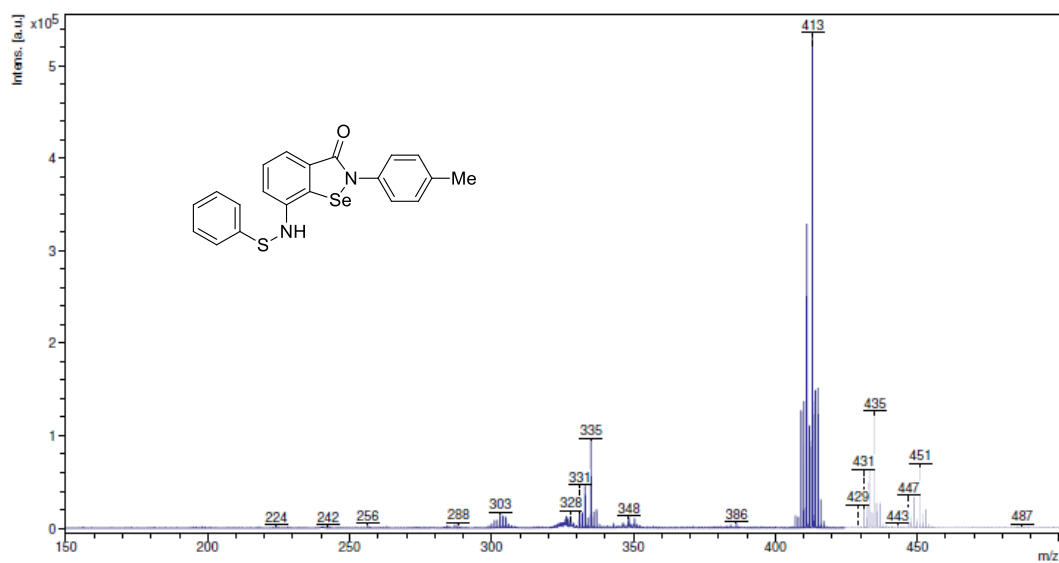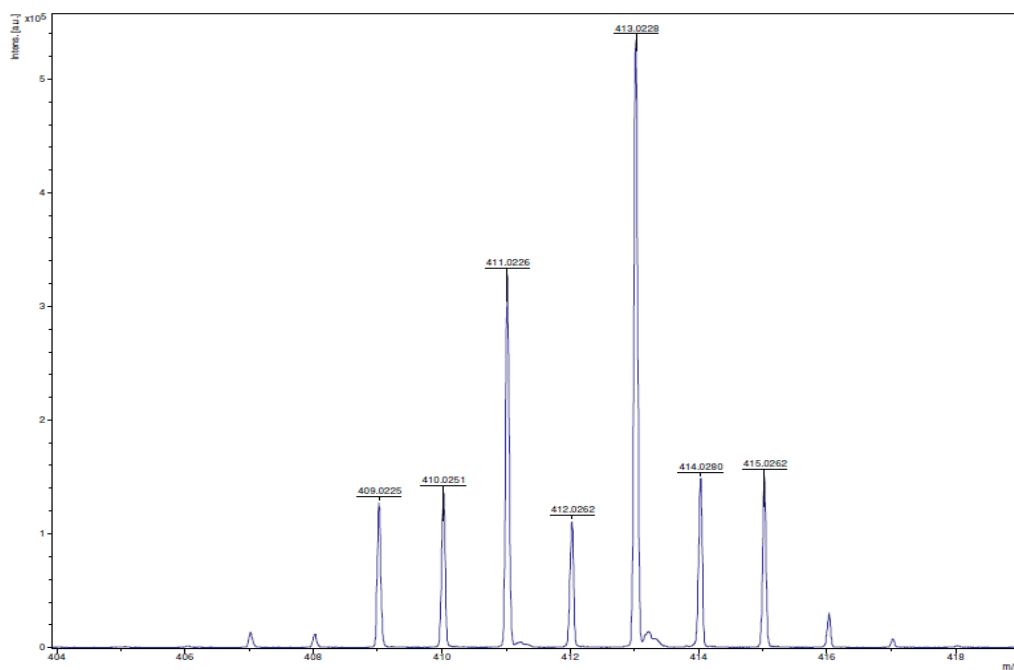

| Formula                                             | Calc m/z | Measured m/z | err [ppm] | ID                 |
|-----------------------------------------------------|----------|--------------|-----------|--------------------|
| C <sub>20</sub> H <sub>16</sub> N <sub>2</sub> OSeS | 413.0222 | 413.0228     | 1.45      | [M+H] <sup>+</sup> |

**Table S1.** Optimized geometries, Sum of electronic and thermal Enthalpies (a.u.), and Cartesian coordinates for compound **12** and its radical.

|                                                                                                                                                                           |              |              |              |                                                                                                                                                                                    |              |              |              |
|---------------------------------------------------------------------------------------------------------------------------------------------------------------------------|--------------|--------------|--------------|------------------------------------------------------------------------------------------------------------------------------------------------------------------------------------|--------------|--------------|--------------|
| 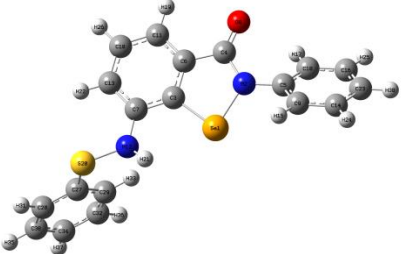 <p><b>12</b></p> <p>Sum of Electronic and Thermal Enthalpies =<br/>-3716.837267a.u.</p> |              |              |              |  <p><b>12 Radical</b></p> <p>Sum of Electronic and Thermal Enthalpies =<br/>-3716.225659a.u.</p> |              |              |              |
| 34                                                                                                                                                                        | -0.00000165  | 0.00000393   | -0.00000160  | 34                                                                                                                                                                                 | 0.00000529   | -0.00000336  | 0.00001825   |
| 7                                                                                                                                                                         | -0.00000728  | -0.00001308  | 0.00000731   | 7                                                                                                                                                                                  | -0.00002985  | 0.000005242  | -0.000008597 |
| 6                                                                                                                                                                         | 0.00000090   | 0.00000655   | 0.000001328  | 6                                                                                                                                                                                  | 0.000002506  | -0.000003307 | -0.000001019 |
| 6                                                                                                                                                                         | -0.00000933  | -0.00000014  | 0.000000332  | 6                                                                                                                                                                                  | 0.000004554  | -0.000002320 | 0.000003349  |
| 6                                                                                                                                                                         | 0.000002446  | 0.000004819  | 0.000002910  | 6                                                                                                                                                                                  | -0.000001050 | 0.000002396  | 0.000007459  |
| 6                                                                                                                                                                         | 0.000000497  | 0.000000506  | 0.000000183  | 6                                                                                                                                                                                  | -0.000000685 | 0.000002392  | -0.000002622 |
| 6                                                                                                                                                                         | 0.000000491  | -0.000001864 | 0.000002336  | 6                                                                                                                                                                                  | 0.000001356  | -0.000001948 | -0.000000385 |
| 8                                                                                                                                                                         | 0.000000355  | -0.000000111 | 0.000000600  | 8                                                                                                                                                                                  | -0.000001507 | 0.000002422  | -0.000000750 |
| 6                                                                                                                                                                         | -0.000004831 | -0.000000732 | -0.000001883 | 6                                                                                                                                                                                  | -0.000000800 | -0.000000568 | 0.000001369  |
| 6                                                                                                                                                                         | 0.000002610  | -0.000000429 | -0.000002764 | 6                                                                                                                                                                                  | 0.000000751  | 0.000002619  | 0.000000372  |
| 6                                                                                                                                                                         | 0.000000883  | -0.000000108 | 0.000000713  | 6                                                                                                                                                                                  | 0.000001805  | 0.000000183  | -0.000001241 |
| 7                                                                                                                                                                         | 0.000003015  | 0.000003050  | -0.000005021 | 7                                                                                                                                                                                  | 0.000008291  | 0.000005965  | -0.000001184 |
| 6                                                                                                                                                                         | 0.000000262  | 0.000000138  | -0.000000505 | 6                                                                                                                                                                                  | 0.000003259  | 0.000002254  | -0.000002385 |
| 6                                                                                                                                                                         | 0.000004877  | 0.000002207  | -0.000001455 | 6                                                                                                                                                                                  | 0.000000195  | 0.000001600  | 0.000002308  |
| 1                                                                                                                                                                         | -0.000000529 | 0.000000751  | -0.000000534 | 1                                                                                                                                                                                  | -0.000001095 | 0.000000467  | 0.000001844  |
| 6                                                                                                                                                                         | -0.000001466 | -0.000000843 | -0.000001976 | 6                                                                                                                                                                                  | -0.000000085 | 0.000001357  | 0.000001287  |
| 1                                                                                                                                                                         | -0.000001185 | 0.000000105  | 0.000001167  | 1                                                                                                                                                                                  | 0.000000379  | 0.000002640  | 0.000000610  |
| 6                                                                                                                                                                         | 0.000000460  | -0.000000108 | 0.000001295  | 6                                                                                                                                                                                  | -0.000000046 | -0.000002066 | -0.000002815 |
| 1                                                                                                                                                                         | 0.000000674  | -0.000000166 | 0.000001411  | 1                                                                                                                                                                                  | 0.000000249  | -0.000000571 | -0.000001853 |
| 16                                                                                                                                                                        | -0.000004473 | -0.000001996 | 0.000002198  | 16                                                                                                                                                                                 | -0.000007632 | -0.000005713 | -0.000001132 |
| 1                                                                                                                                                                         | 0.000000214  | 0.000000712  | 0.000000303  | 1                                                                                                                                                                                  | 0.000000918  | -0.000003089 | -0.000002659 |
| 1                                                                                                                                                                         | 0.000000396  | -0.000000290 | 0.000000900  | 6                                                                                                                                                                                  | -0.000001576 | 0.000003003  | 0.000003586  |
| 6                                                                                                                                                                         | -0.000000096 | 0.000003289  | 0.000002675  | 1                                                                                                                                                                                  | -0.000001729 | 0.000001139  | 0.000003204  |
| 1                                                                                                                                                                         | -0.000000568 | 0.000001365  | -0.000001434 | 1                                                                                                                                                                                  | 0.000000189  | 0.000003587  | 0.000002262  |
| 1                                                                                                                                                                         | 0.000000416  | 0.000001123  | 0.000000805  | 1                                                                                                                                                                                  | 0.000002126  | -0.000001091 | -0.000003040 |
| 1                                                                                                                                                                         | 0.000000694  | -0.000000317 | 0.000001260  | 6                                                                                                                                                                                  | -0.000004018 | -0.000002692 | 0.000000211  |
| 6                                                                                                                                                                         | 0.000000843  | -0.000000126 | 0.000000895  | 6                                                                                                                                                                                  | 0.000004079  | -0.000005127 | -0.000001069 |
| 6                                                                                                                                                                         | -0.000000136 | -0.000000847 | -0.000000285 | 6                                                                                                                                                                                  | 0.000000602  | 0.000001528  | -0.000001579 |
| 6                                                                                                                                                                         | -0.000000105 | -0.000001337 | -0.000001067 | 6                                                                                                                                                                                  | -0.000001860 | 0.000002088  | -0.000001580 |
| 6                                                                                                                                                                         | -0.000000283 | -0.000001378 | -0.000000762 | 1                                                                                                                                                                                  | -0.000000759 | -0.000002368 | -0.000001724 |
| 1                                                                                                                                                                         | -0.000000064 | -0.000000104 | 0.000000056  | 6                                                                                                                                                                                  | 0.000001872  | -0.000002953 | 0.000000766  |
| 6                                                                                                                                                                         | -0.000000388 | -0.000001149 | -0.000000420 | 1                                                                                                                                                                                  | -0.000000114 | -0.000000221 | 0.000000223  |
| 1                                                                                                                                                                         | -0.000000222 | -0.000000380 | -0.000000154 | 6                                                                                                                                                                                  | -0.000003879 | -0.000004121 | 0.000000765  |
| 6                                                                                                                                                                         | -0.000000486 | -0.000001381 | -0.000000626 | 1                                                                                                                                                                                  | -0.000000808 | -0.000003511 | -0.000000859 |
| 1                                                                                                                                                                         | -0.000000243 | -0.000001338 | -0.000000426 | 1                                                                                                                                                                                  | -0.000001414 | -0.000000353 | 0.000000759  |
| 1                                                                                                                                                                         | -0.000000329 | -0.000001436 | -0.000000721 | 1                                                                                                                                                                                  | -0.000000582 | -0.000001331 | 0.000000951  |
| 1                                                                                                                                                                         | -0.000000382 | -0.000001783 | -0.000000809 | 1                                                                                                                                                                                  | -0.000001038 | 0.000002804  | 0.000003341  |
| 1                                                                                                                                                                         | -0.000001608 | 0.000000431  | -0.000001097 |                                                                                                                                                                                    |              |              |              |

**Table S2.** Optimized geometries, Sum of electronic and thermal Enthalpies (a.u.), and Cartesian coordinates for compound **17** and its radical.

|                                                                                                                                                                            |              |              |              |                                                                                                                                                                                      |              |              |              |
|----------------------------------------------------------------------------------------------------------------------------------------------------------------------------|--------------|--------------|--------------|--------------------------------------------------------------------------------------------------------------------------------------------------------------------------------------|--------------|--------------|--------------|
| 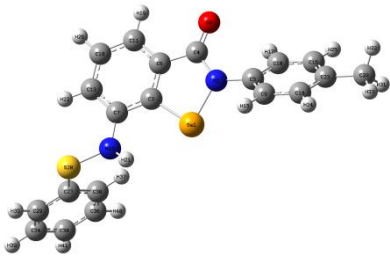 <p><b>17</b></p> <p>Sum of Electronic and Thermal Enthalpies =<br/>-3756.133564 a.u.</p> |              |              |              |  <p><b>17 Radical</b></p> <p>Sum of Electronic and Thermal Enthalpies =<br/>-3755.521805 a.u.</p> |              |              |              |
| 34                                                                                                                                                                         | -0.000000619 | -0.000000042 | 0.000000840  | 34                                                                                                                                                                                   | -0.000000713 | 0.000000410  | -0.000000257 |
| 7                                                                                                                                                                          | -0.000000551 | -0.000000299 | 0.000001236  | 7                                                                                                                                                                                    | 0.000000455  | -0.000000770 | 0.000003637  |
| 6                                                                                                                                                                          | 0.000000954  | 0.000000283  | -0.000002386 | 6                                                                                                                                                                                    | 0.000001112  | -0.000000730 | -0.000000335 |
| 6                                                                                                                                                                          | -0.000001842 | 0.000002311  | -0.000000567 | 6                                                                                                                                                                                    | -0.000000482 | 0.000002116  | -0.000000228 |
| 6                                                                                                                                                                          | -0.000000289 | -0.000000477 | -0.000000365 | 6                                                                                                                                                                                    | -0.000000243 | 0.000000012  | -0.000000202 |
| 6                                                                                                                                                                          | -0.000001979 | 0.000001722  | 0.000001001  | 6                                                                                                                                                                                    | 0.000000076  | 0.000000694  | -0.000000074 |
| 6                                                                                                                                                                          | -0.000001568 | -0.000000709 | 0.000002605  | 6                                                                                                                                                                                    | -0.000001347 | -0.000001012 | -0.000000312 |
| 8                                                                                                                                                                          | -0.000000771 | 0.000001966  | -0.000000074 | 8                                                                                                                                                                                    | 0.000000372  | -0.000000701 | 0.000001109  |
| 6                                                                                                                                                                          | -0.000002764 | 0.000000256  | 0.000000940  | 6                                                                                                                                                                                    | -0.000001121 | -0.000000195 | 0.000000027  |
| 6                                                                                                                                                                          | 0.000000157  | 0.000001376  | 0.000001372  | 6                                                                                                                                                                                    | 0.000001136  | 0.000000852  | -0.000000046 |
| 6                                                                                                                                                                          | 0.000000626  | 0.000001973  | -0.000000283 | 6                                                                                                                                                                                    | 0.000000004  | 0.000000140  | 0.000000705  |
| 7                                                                                                                                                                          | 0.000002438  | 0.000003119  | 0.000001407  | 7                                                                                                                                                                                    | 0.000005178  | 0.000001943  | -0.000000483 |
| 6                                                                                                                                                                          | -0.000000729 | 0.000001493  | -0.000000146 | 6                                                                                                                                                                                    | 0.000000255  | 0.000001205  | -0.000000188 |
| 6                                                                                                                                                                          | -0.000000246 | 0.000001014  | 0.000002191  | 6                                                                                                                                                                                    | 0.000000695  | 0.000000613  | 0.000000289  |
| 1                                                                                                                                                                          | -0.000001385 | -0.000000641 | 0.000001997  | 1                                                                                                                                                                                    | -0.000000443 | 0.000000310  | 0.000000553  |
| 6                                                                                                                                                                          | -0.000002684 | 0.000000542  | 0.000000571  | 6                                                                                                                                                                                    | -0.000000579 | -0.000000620 | 0.000000599  |
| 1                                                                                                                                                                          | -0.000000523 | 0.000001058  | -0.000000395 | 1                                                                                                                                                                                    | 0.000000401  | 0.000000105  | 0.000001317  |
| 6                                                                                                                                                                          | -0.000000897 | 0.000002175  | -0.000002050 | 6                                                                                                                                                                                    | 0.000000110  | -0.000000653 | 0.000000073  |
| 1                                                                                                                                                                          | -0.000000990 | 0.000002800  | -0.000000829 | 1                                                                                                                                                                                    | -0.000000192 | -0.000000187 | 0.000000643  |
| 16                                                                                                                                                                         | -0.000001058 | 0.000001068  | -0.000004160 | 16                                                                                                                                                                                   | -0.000003571 | -0.000001240 | -0.000001769 |
| 1                                                                                                                                                                          | -0.000000521 | -0.000002264 | 0.000000236  | 1                                                                                                                                                                                    | 0.000000182  | -0.000000801 | -0.000000199 |
| 1                                                                                                                                                                          | 0.000000025  | 0.000001143  | -0.000000893 | 6                                                                                                                                                                                    | 0.000000459  | -0.000000126 | 0.000002257  |
| 6                                                                                                                                                                          | -0.000000300 | -0.000002006 | 0.000000539  | 1                                                                                                                                                                                    | -0.000000633 | 0.000000399  | 0.000001094  |
| 1                                                                                                                                                                          | -0.000001878 | -0.000001102 | 0.000002266  | 1                                                                                                                                                                                    | 0.000000515  | 0.000000081  | 0.000001741  |
| 1                                                                                                                                                                          | -0.000000498 | 0.000000648  | 0.000000170  | 1                                                                                                                                                                                    | 0.000000236  | -0.000000109 | 0.000000269  |
| 1                                                                                                                                                                          | -0.000000469 | 0.000002903  | -0.000000965 | 6                                                                                                                                                                                    | -0.000001953 | -0.000001883 | 0.000000893  |
| 6                                                                                                                                                                          | 0.000004770  | -0.000005021 | 0.000008126  | 6                                                                                                                                                                                    | 0.000000067  | -0.000000556 | 0.000001208  |
| 6                                                                                                                                                                          | -0.000001606 | -0.000000537 | 0.000001862  | 6                                                                                                                                                                                    | 0.000000908  | -0.000000241 | -0.000002133 |
| 6                                                                                                                                                                          | -0.000001258 | 0.000005036  | -0.000009207 | 6                                                                                                                                                                                    | 0.000000296  | 0.000000300  | -0.000002041 |
| 6                                                                                                                                                                          | 0.000000755  | -0.000005203 | -0.000001072 | 1                                                                                                                                                                                    | -0.000000175 | 0.000000915  | 0.000001358  |
| 1                                                                                                                                                                          | -0.000000381 | -0.000000586 | 0.000000593  | 1                                                                                                                                                                                    | -0.000000918 | 0.000000902  | 0.000001431  |
| 1                                                                                                                                                                          | -0.000001840 | 0.000000910  | 0.000001519  | 1                                                                                                                                                                                    | -0.000000166 | 0.000001003  | 0.000001230  |
| 1                                                                                                                                                                          | -0.000001738 | -0.000001260 | 0.000002386  | 6                                                                                                                                                                                    | -0.000000320 | 0.000000779  | -0.000002290 |
| 6                                                                                                                                                                          | 0.000001326  | -0.000010417 | 0.000001036  | 1                                                                                                                                                                                    | -0.000000042 | -0.000000092 | -0.000001223 |
| 1                                                                                                                                                                          | 0.000001150  | -0.000002062 | 0.000000739  | 6                                                                                                                                                                                    | 0.000001048  | -0.000000828 | -0.000001434 |
| 6                                                                                                                                                                          | 0.000000323  | 0.000001281  | -0.000006847 | 1                                                                                                                                                                                    | 0.000000348  | 0.000000121  | -0.000000701 |
| 1                                                                                                                                                                          | 0.000001478  | -0.000000136 | -0.000000950 | 6                                                                                                                                                                                    | -0.000000907 | -0.000000903 | -0.000001229 |
| 6                                                                                                                                                                          | 0.000006821  | 0.000003022  | 0.000003140  | 1                                                                                                                                                                                    | -0.000000203 | -0.000000512 | -0.000002047 |
| 1                                                                                                                                                                          | 0.000002825  | -0.000000938 | -0.000001492 | 1                                                                                                                                                                                    | 0.000000116  | -0.000000379 | -0.000001348 |
| 1                                                                                                                                                                          | 0.000002980  | -0.000001953 | -0.000001174 | 1                                                                                                                                                                                    | 0.000000038  | -0.000000364 | -0.000001896 |
| 1                                                                                                                                                                          | 0.000002755  | -0.000002446 | -0.000002921 |                                                                                                                                                                                      |              |              |              |

**Table S3.** Optimized geometries, Sum of electronic and thermal Enthalpies (a.u.), and Cartesian coordinates for compound **12** and **17** Radical Cation.

|                                                                                            |              |              |              |                                                                                             |              |              |              |
|--------------------------------------------------------------------------------------------|--------------|--------------|--------------|---------------------------------------------------------------------------------------------|--------------|--------------|--------------|
| 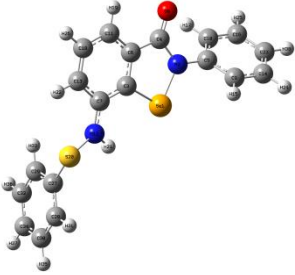          |              |              |              |           |              |              |              |
| <b>12 Radical Cation</b><br>Sum of Electronic and Thermal Enthalpies =<br>-3716.601313a.u. |              |              |              | <b>17 Radical Cation</b><br>Sum of Electronic and Thermal Enthalpies =<br>-3755.902322 a.u. |              |              |              |
| 34                                                                                         | 0.000000036  | 0.000002127  | -0.000000598 | 34                                                                                          | 0.000001899  | -0.000000961 | -0.000000360 |
| 7                                                                                          | 0.000014722  | 0.000024288  | 0.000014718  | 7                                                                                           | -0.000003518 | 0.000000901  | -0.000003565 |
| 6                                                                                          | -0.000013661 | -0.000005681 | 0.000002362  | 6                                                                                           | 0.000002013  | -0.000000393 | 0.000001462  |
| 6                                                                                          | -0.000006289 | -0.000030501 | -0.000011875 | 6                                                                                           | 0.000001081  | -0.000001824 | 0.000002126  |
| 6                                                                                          | -0.000017612 | -0.000013163 | -0.000008666 | 6                                                                                           | -0.000005077 | 0.000011517  | 0.000027264  |
| 6                                                                                          | 0.000010346  | 0.000010711  | 0.000000094  | 6                                                                                           | -0.000001521 | 0.000000018  | 0.000001583  |
| 6                                                                                          | 0.000027151  | -0.000017824 | -0.000002478 | 6                                                                                           | -0.000003502 | -0.000002654 | 0.000001533  |
| 8                                                                                          | -0.000003299 | 0.000007420  | 0.000004314  | 8                                                                                           | -0.000001794 | -0.000001188 | 0.000001206  |
| 6                                                                                          | 0.000005842  | 0.000002461  | 0.000000189  | 6                                                                                           | -0.000024832 | -0.000013041 | -0.000018587 |
| 6                                                                                          | 0.000003055  | 0.000003006  | 0.000001097  | 6                                                                                           | 0.000025090  | 0.000009712  | -0.000017450 |
| 6                                                                                          | -0.000011075 | -0.000005262 | 0.000003286  | 6                                                                                           | -0.000002328 | -0.000000856 | 0.000001549  |
| 7                                                                                          | -0.000034429 | 0.000010233  | 0.000015168  | 7                                                                                           | -0.000003023 | 0.000002770  | 0.000001791  |
| 6                                                                                          | -0.000007195 | 0.000007092  | -0.000000731 | 6                                                                                           | 0.000000023  | 0.000004492  | 0.000002282  |
| 6                                                                                          | -0.000002210 | -0.000000338 | -0.000000378 | 6                                                                                           | 0.0000022541 | 0.000006172  | -0.000024502 |
| 1                                                                                          | 0.000000133  | 0.000000703  | -0.000000594 | 1                                                                                           | 0.000001979  | -0.000000606 | 0.000000177  |
| 6                                                                                          | 0.000001442  | -0.000001015 | 0.000000073  | 6                                                                                           | -0.000020771 | -0.000015057 | -0.000023467 |
| 1                                                                                          | 0.000000849  | -0.000001153 | -0.000000992 | 1                                                                                           | -0.000000732 | -0.000003391 | 0.000001469  |
| 6                                                                                          | 0.000010047  | -0.000001708 | 0.000000203  | 6                                                                                           | 0.000000776  | -0.000000254 | 0.000002017  |
| 1                                                                                          | 0.000000409  | 0.000000304  | 0.000001319  | 1                                                                                           | -0.000001468 | -0.000000623 | 0.000002664  |
| 16                                                                                         | 0.000019907  | 0.000006213  | -0.000007669 | 16                                                                                          | 0.000003032  | 0.000002985  | 0.000000441  |
| 1                                                                                          | 0.000002085  | 0.000000151  | -0.000006420 | 1                                                                                           | 0.000000243  | 0.000000753  | -0.000000001 |
| 1                                                                                          | -0.000000786 | 0.000001921  | 0.000001088  | 1                                                                                           | -0.000001062 | 0.000000865  | 0.000001712  |
| 6                                                                                          | 0.000001479  | 0.000000067  | -0.000003127 | 6                                                                                           | -0.000010917 | 0.000007201  | 0.000063227  |
| 1                                                                                          | 0.000000355  | -0.000000339 | -0.000001056 | 1                                                                                           | 0.000002974  | -0.000006512 | -0.000000488 |
| 1                                                                                          | -0.000000988 | -0.000001838 | -0.000001656 | 1                                                                                           | 0.000004828  | -0.000007683 | -0.000000269 |
| 1                                                                                          | -0.000000798 | 0.000000316  | 0.000001181  | 1                                                                                           | -0.000001838 | 0.000000408  | 0.000003012  |
| 6                                                                                          | 0.000001229  | -0.000001617 | 0.000008996  | 6                                                                                           | -0.000000262 | 0.000001117  | 0.000000161  |
| 6                                                                                          | -0.000004121 | 0.000003729  | -0.000004980 | 6                                                                                           | 0.000025579  | -0.000042431 | 0.000023967  |
| 6                                                                                          | -0.000002892 | -0.000001191 | -0.000002030 | 6                                                                                           | 0.000003366  | -0.000000099 | 0.000000863  |
| 6                                                                                          | 0.000002466  | -0.000003145 | 0.000003891  | 6                                                                                           | -0.000000868 | 0.000002979  | -0.000001836 |
| 1                                                                                          | 0.000001088  | 0.000000904  | 0.000000631  | 1                                                                                           | -0.000002666 | 0.000009174  | -0.000017353 |
| 6                                                                                          | 0.000000820  | 0.000002004  | 0.000000516  | 1                                                                                           | -0.000009100 | 0.000013783  | -0.000016265 |
| 1                                                                                          | 0.000000665  | 0.000000866  | -0.000000227 | 1                                                                                           | -0.000002880 | 0.000011611  | -0.000015374 |
| 6                                                                                          | 0.000000027  | -0.000000440 | -0.000004371 | 6                                                                                           | 0.000000176  | 0.000002915  | -0.000002599 |
| 1                                                                                          | 0.000001112  | 0.000002050  | -0.000001116 | 1                                                                                           | 0.000000049  | 0.000003405  | 0.000000030  |
| 1                                                                                          | 0.000000258  | -0.000001133 | 0.000000215  | 6                                                                                           | 0.000001810  | -0.000001348 | 0.000000973  |
| 1                                                                                          | -0.000000239 | 0.000000324  | 0.000000752  | 1                                                                                           | -0.000000505 | -0.000000084 | 0.000001121  |
| 1                                                                                          | 0.000000071  | -0.000000542 | -0.000001128 | 6                                                                                           | -0.000000676 | 0.000002402  | 0.000001282  |
|                                                                                            |              |              |              | 1                                                                                           | 0.000001084  | 0.000002373  | -0.000000409 |
|                                                                                            |              |              |              | 1                                                                                           | -0.000000261 | 0.000000345  | -0.000000179 |
|                                                                                            |              |              |              | 1                                                                                           | 0.000001054  | 0.000001105  | -0.000001208 |

**Table S4.** Optimized geometries and Cartesian coordinates for compound **11**.

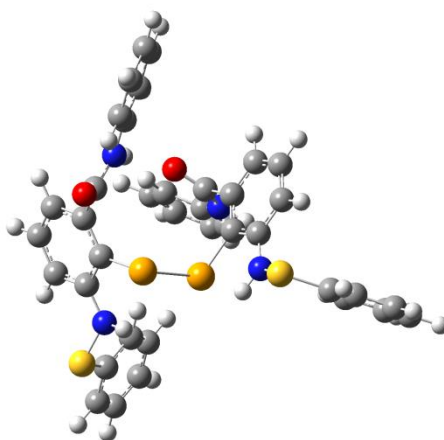

**11**

|    |             |             |             |   |             |             |             |
|----|-------------|-------------|-------------|---|-------------|-------------|-------------|
| Se | -0.07021287 | 0.26466912  | -2.22437912 | C | -2.17764388 | 1.83297067  | 3.36190186  |
| Se | -0.30488869 | -1.15689016 | -0.28154456 | H | -1.41397595 | 0.55858950  | 1.80626739  |
| O  | -0.06477773 | 3.62480610  | -2.73960113 | C | 0.00744992  | 0.89110137  | 2.20107370  |
| N  | 2.77396609  | -1.03377844 | -2.27519394 | C | 1.92636085  | -0.12043996 | 3.47515671  |
| H  | 1.85404802  | -1.37454281 | -2.52652374 | C | 2.23717521  | -1.21014896 | 4.30373313  |
| N  | 0.14278766  | 3.87072396  | -0.45931003 | H | 1.48865514  | -1.97245028 | 4.50290261  |
| H  | 0.61993534  | 3.46249073  | 0.34235363  | C | 3.49659286  | -1.31898036 | 4.87718937  |
| C  | 1.64774304  | 1.10120426  | -1.92280179 | H | 3.72227307  | -2.16543807 | 5.51788559  |
| C  | 2.83919531  | 0.34190071  | -2.03178916 | C | 4.45224403  | -0.33871529 | 4.62574168  |
| C  | 4.06950342  | 0.98641326  | -1.83997218 | C | 4.15227775  | 0.74205982  | 3.80473062  |
| H  | 4.98453189  | 0.41270351  | -1.92173999 | H | 4.89917434  | 1.50330190  | 3.60556011  |
| C  | 4.11748859  | 2.34334197  | -1.55867424 | C | 2.89278587  | 0.86238189  | 3.22205538  |
| H  | 5.08112998  | 2.82232852  | -1.41763960 | H | 2.65780789  | 1.70091647  | 2.58476841  |
| C  | 2.94874032  | 3.09524822  | -1.46223204 | C | -5.70892127 | -2.89084118 | -0.52799529 |
| H  | 2.99340081  | 4.15999298  | -1.26150058 | C | -7.02274509 | -3.18935860 | -0.90384837 |
| C  | 1.71417747  | 2.47623995  | -1.64995009 | C | -5.07963056 | -3.63590213 | 0.46776357  |
| C  | 0.48261796  | 3.35981986  | -1.68108063 | C | -7.69891661 | -4.23595677 | -0.28313621 |
| C  | -0.83354909 | 4.84380909  | -0.16112845 | H | -7.51765679 | -2.60858943 | -1.67731949 |
| C  | -1.75690147 | 5.32710576  | -1.10049209 | C | -5.76811409 | -4.67922613 | 1.08633849  |
| H  | -1.74420076 | 4.94780075  | -2.11086711 | H | -4.06112730 | -3.40214927 | 0.75496090  |
| C  | -2.67852080 | 6.29797842  | -0.71614324 | C | -7.07579193 | -4.98486637 | 0.71546107  |
| H  | -3.38871183 | 6.66826189  | -1.44887604 | H | -8.71760710 | -4.46370898 | -0.58036673 |
| C  | -2.69070419 | 6.78785897  | 0.58530038  | H | -5.27450146 | -5.25583680 | 1.86242898  |
| C  | -1.77653747 | 6.31219773  | 1.52196659  | H | -7.60580046 | -5.79841647 | 1.19919631  |
| H  | -1.77362663 | 6.69527010  | 2.53788886  | S | -4.91250486 | -1.53111974 | -1.39819773 |
| C  | -0.85090310 | 5.34642523  | 1.15101188  | C | 4.69732265  | -2.80716865 | -1.45142096 |
| H  | -0.12822693 | 4.98125919  | 1.87378508  | C | 4.29342819  | -2.50542270 | -0.15157217 |
| O  | 0.51624739  | 1.97314624  | 1.93177684  | C | 5.66373298  | -3.79302730 | -1.67678400 |
| N  | -3.39949776 | -1.40450534 | -0.64359118 | C | 4.86064246  | -3.19164027 | 0.92199697  |
| H  | -2.61802237 | -1.81952015 | -1.13343357 | H | 3.54122827  | -1.74468699 | 0.01845156  |
| N  | 0.62448471  | -0.08772428 | 2.92710120  | C | 6.22385604  | -4.47097024 | -0.59756404 |
| H  | 0.06463358  | -0.91020021 | 3.10036892  | H | 5.97522025  | -4.03513188 | -2.68910276 |
| C  | -1.71996589 | -0.28898592 | 0.72786059  | C | 5.82533238  | -4.17374720 | 0.70598909  |
| C  | -3.07848659 | -0.53989562 | 0.40066395  | H | 4.54786556  | -2.94572481 | 1.93169610  |
| C  | -4.08289362 | 0.07699754  | 1.16164989  | H | 6.97113221  | -5.23712301 | -0.77858442 |
| H  | -5.12069007 | -0.10775500 | 0.91315441  | H | 6.26390777  | -4.70385616 | 1.54491447  |
| C  | -3.75812940 | 0.92197485  | 2.21063372  | S | 4.06147315  | -1.95809941 | -2.90245196 |
| H  | -4.55270327 | 1.39487099  | 2.77779908  | H | -3.42012783 | 7.55417409  | 0.87503167  |
| C  | -2.42823839 | 1.16846333  | 2.54296209  | H | 5.44727027  | -0.41972875 | 5.07849002  |

**Table S5.** Data for **12** and **17** obtained by DFT calculations at the B3LYP/6-311+G(d) level in the gas phase. The N-H bond dissociation enthalpies ( $BDE_{N-H}$ ) of **12** and **17** were calculated.

| AOs       | Calculated $BDE_{N-H}$ (Kcal/mol) | Energy of 1-e oxidation (Kcal/mol) | $r_{Se-N}$ [Å] | NPA Charges <sup>a</sup> |        | <sup>77</sup> Se{ <sup>1</sup> H} NMR (ppm) <sup>b</sup> |                                          |
|-----------|-----------------------------------|------------------------------------|----------------|--------------------------|--------|----------------------------------------------------------|------------------------------------------|
|           |                                   |                                    |                | $q_{Se}$                 | $q_S$  | Exptl.                                                   | Calcd.                                   |
| <b>12</b> | 70.03                             | 148.81                             | 1.897          | +0.590                   | +0.466 | 833                                                      | 936                                      |
| <b>17</b> | 70.12                             | 145.85                             | 1.896          | +0.587                   | +0.466 | 856                                                      | 925                                      |
| <b>10</b> |                                   |                                    |                | +0.213                   | +0.063 | 452                                                      | 455, 421 <sup>c</sup> , 403 <sup>d</sup> |
| <b>16</b> |                                   |                                    |                | +0.216                   | +0.063 | 453                                                      | 440, 404 <sup>c</sup> , 386 <sup>d</sup> |
| <b>11</b> |                                   |                                    |                |                          |        | 534                                                      | 548                                      |

<sup>a</sup>The NBO analysis was calculated at the B3LYP/6-311+G(d,p) level using the B3LYP/6-311+G(d)-level-optimized geometries. <sup>b</sup> The <sup>77</sup>Se{<sup>1</sup>H} NMR values are referenced to Me<sub>2</sub>Se ( $\delta = 0$ ). The experimental values are given in parentheses. <sup>c</sup>The <sup>77</sup>Se{<sup>1</sup>H} NMR value calculated in chloroform solvent. <sup>d</sup>The <sup>77</sup>Se{<sup>1</sup>H} NMR value calculated in DMSO solvent.

**Formula used for Bond Dissociation Energy:-**

$$BDE_{N-H} = [\text{Energy (Molecule Radical)} + \text{Energy (H)}] - [\text{Energy (Molecule)}]$$

Formula used for calculation of 1-electron oxidation:-

$$[\text{Energy (Molecule Radical Cation)} + \text{Energy (electron)}] - [\text{Energy (Molecule)}]$$

**Table S6.** The calculated  $^{77}\text{Se}\{^1\text{H}\}$  NMR value of isolated compounds with isotropic and anisotropic values (ppm)

|                                                                                                                                     |                                                                                                                                     |
|-------------------------------------------------------------------------------------------------------------------------------------|-------------------------------------------------------------------------------------------------------------------------------------|
| <p><b>Compound 12</b></p> <p>SCF GIAO Magnetic shielding tensor (ppm):</p> <p>1 Se Isotropic = 691.1663 Anisotropy = 1312.2695</p>  | <p><b>Compound 17</b></p> <p>SCF GIAO Magnetic shielding tensor (ppm):</p> <p>1 Se Isotropic = 693.7769 Anisotropy = 1313.9572</p>  |
| <p><b>Compound 10</b></p> <p>SCF GIAO Magnetic shielding tensor (ppm):</p> <p>1 Se Isotropic = 1166.2349 Anisotropy = 1053.4431</p> | <p><b>Compound 16</b></p> <p>SCF GIAO Magnetic shielding tensor (ppm):</p> <p>1 Se Isotropic = 1181.7122 Anisotropy = 1053.3671</p> |
| <p><b>Compound 11</b></p> <p>SCF GIAO Magnetic shielding tensor (ppm):</p> <p>1 Se Isotropic = 1073.8904 Anisotropy = 1228.5857</p> |                                                                                                                                     |

The  $^{77}\text{Se}\{^1\text{H}\}$  NMR calculations were performed at B3LYP/6-311+G (d,p) level on B3LYP/6-311+G(d)-level-optimized geometries by using the gauge-including atomic orbital (GIAO) method (referenced with respect to the peak of  $\text{Me}_2\text{Se}$ ).

**Figure S57.** Spin density maps of the radical cations of **12** and **17** formed upon 1-electron oxidation calculated at the UB3LYP/6-311+G(d) level in gas phase.

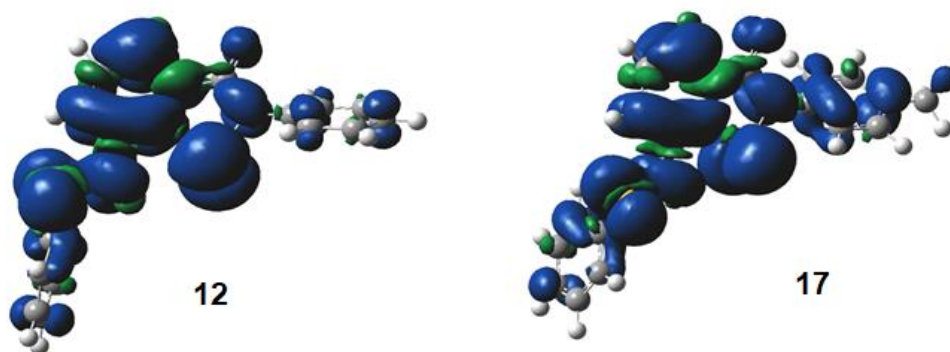



**Scheme S1:** Proposed mechanism for **12** from diselenide **9**

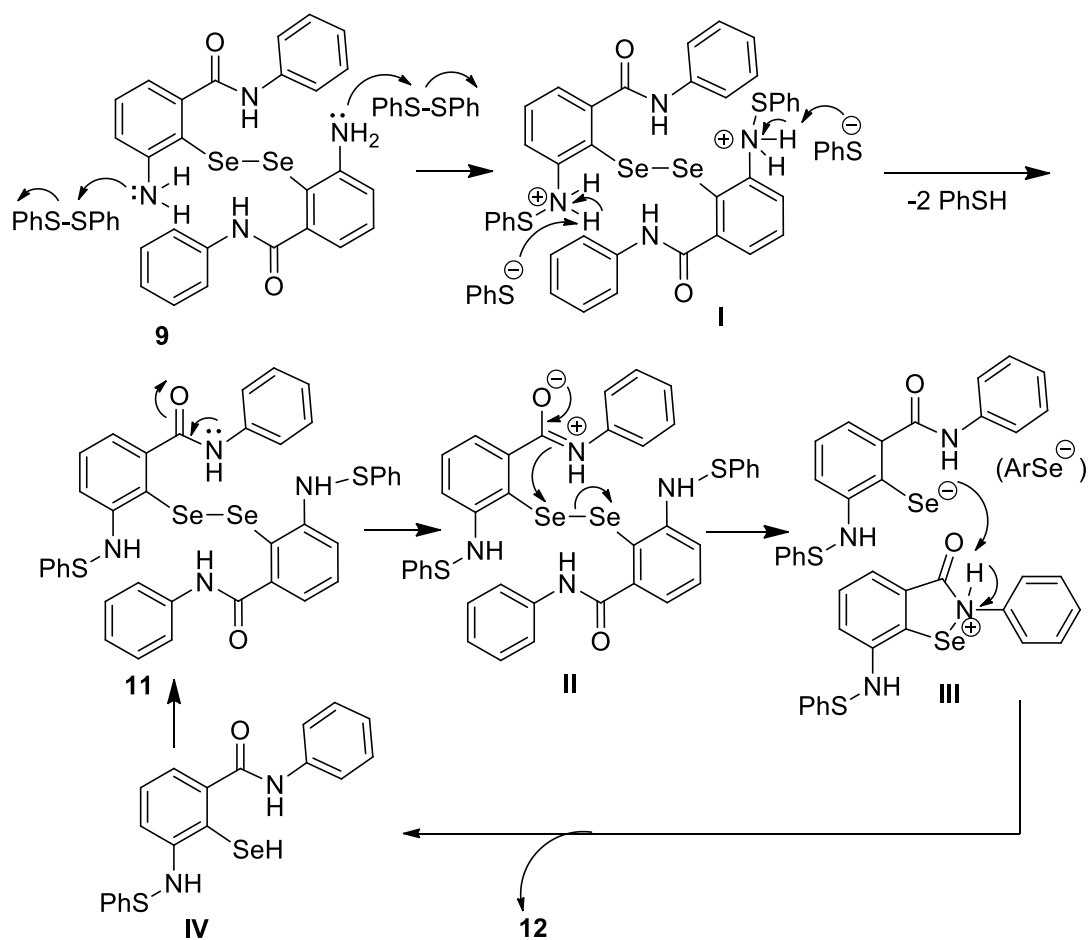

Supplement: d2nj01225a1.pdf [file d2nj01225a1.pdf]
